# Supplementary material
Source: publisher figshare collection journal article supplement (https://becaris.figshare.com/articles/dataset/_/25745760)
Supplement: Supplementary file 1 [file 1]

## Sheet: Variables definition
Supplementary Appendix B	Drugs
Supplement to: C.Foch, A. Allignol, T. Hohenberger, E. Boutmy, S. Schaefer, U. Hostalek, The effectiveness of bisoprolol versus other beta-blockers and other antihypertensive classes to treat high blood pressure: A cohort study using the UK Clinical Practice Research Datalink, Pharmacol. Res.	Aspirin (≥300 mg)
Variables definition Clinical measurements were defined using the most recent recorded within the baseline period. In addition, to avoid the effect of outliers in summary statistics for SBP, DBP, and BMI, the following realistic ranges of each of these variables were defined: - SBP: 60–250 mmHg - DBP: 30–150 mmHg - BMI: 15–45 kg/m2 Values recorded outside these ranges were deleted Impaired fastin…	Butylpyrazolidines: phenylbutazone
	Acetic acid derivates and related substances: indometacin, sulindac, diclofenac, etodolac, acemetacin, aceclofenac, diflunisal, etodolac, salsalate, mefenamic acid
Baseline co-medications:	Lornoxicam, Meloxicam, Piroxicam, Tenoxicam
Therapeutic class	Propionic acid derivates: ibuprofen, naproxen, ketoprofen, fenoprofen, fenbufen, flurbiprofen, tiaprofenic, dexibuprofen, dexketoprofen
Non-steroidal anti-inflammatory drugs	Coxib: celecoxib, rofecoxib, etoricoxib, lumiracoxib, valdecoxib
	Nabumetone
	Tricyclic and related antidepressant drugs: Amitriptyline, Amoxapine, Butriptyline, Clomipramine, Desipramine, Dosulepin, Doxepin, Fluphenazine, Imipramine, Iprindole, Lofepramine, Mianserin, Nortriptyline, Protriptyline, Trazodone, Trimipramine, Viloxazine.
	Selective Serotonin Re-Uptake Inhibitors: Citalopram, Escitalopram, Fluoxetine, Fluvoxamine, Nefazodone, Paroxetine, Sertraline.
	Monoamince-oxidase inhibitors: Iproniazide, Isocarboxazid, Moclobemide, Phenelzine, Tranylcypromine, Trifluoperazine.
	Other antidepressant drugs: Agomelatine, Duloxetine, Flupentixol, Mirtazapine, Nefazodone Hydrochloride, Pyridoxine, Reboxetine, Tryptophan, Venlafaxine, Vortioxetine
	Combined hormonal contraceptives: Cyproterone Acetate/Ethinylestradiol, Desogestrel/Ethinylestradiol, Drospirenone/Ethinylestradiol, Estradiol Valerate/Dienogest, Ethinylestradiol/Cyproterone acetate, Ethinylestradiol/Etonogestrel, Ethinylestradiol/Etynodiol, Ethinylestradiol/Gestodene, Ethinylestradiol/Levonorgestrel, Ethinylestradiol/Lynestrenol, Ethinylestradiol/Norelgestromin, Ethinylestradio…
Antidepressant drugs	Oestrogens and hormonal replacement therapy: Bazedoxifene acetate/Conjugated oestrogens, Clonidine hydrochloride, Conjugated oestrogens, Dienestrol, Drospirenone/Estradiol hemihydrate, Dydrogesterone/Estradiol, Dydrogesterone/Estradiol, Estradiol/Levonorgestrel, Estradiol/Norethisterone, Estradiol, Estradiol/Medroxyprogesterone, Estradiol /Norgestrel, Estradiol/Estriol/Estrone, Estriol, Ethinyles…
	Alfentanil, Alfentanil hydrochloride, Buclizine/Paracetamol/Codeine, Buprenorphine, Buprenorphine/Naloxone, Cocaine/Diamorphine, Codeine, Codeine/Papaverine/Morphine, Cyclizine/Dipipanone, Cyclizine/Morphine, Dextromoramide, Dextropropoxyphene, Diamorphine, Dihydrocodeine, Ethylmorphine, Fentanyl, Hydromorphone, Levorphanol, Meptazinol, Methadone, Morphine, Nalbuphine, Naloxone/Oxycodone, Oxycodo…
	Alfuzosin, Doxazosin, Indoramin, Metirosine, Phenoxybenzamine, Phentolamine, Prazosin, Tamsulosin, Terazosin, Terazosine
	Organic nitrates: isosorbide mononitrate, isosorbide dinitrate, glyceryl trinitrate, pentaerythrityl tetranitrate
Estrogens	Others: Nicorandil, ivabradine, ranolazine
	acetylsalicylic acid (aspirin < 300 mg)
Opioid analgesics	Prasugrel, clopidogrel, ticagrelor, ticlopidine
Alpha-blockers	Dipyridamole
Anti-anginals	Heparin: heparin, dalteparin, enoxaparin, danaparoid, tinzaparin
	Vitamin K antagonist: phenindione, warfarin, acenocoumarol
Platelet aggregation inhibitors	Direct thrombin inhibitors: dabigatran
	Direct factor Xa inhibitors: rivaroxaban, apixaban, edoxaban
	Other: fondaparinux
Anticoagulants	Amisulpride, Aripiprazole, Benperidol, Chlorpromazine, Chlorprothixene, Clozapine, Droperidol, Flupentixol, Fluphenazine, Haloperidol, Levomepromazine, Loxapine, Lurasidone, Olanzapine, Oxypertine, Paliperidone, Pericyazine, Perphenazine, Pimozide, Prochlorperazine, Promazine, Quetiapine, Remoxipride, Risperidone, Sertindole, Sulpiride, Thioridazine, Trifluoperazine, Trifluperidol, Zotepine, Zucl…
Antipsychotics

## Sheet: READ codes
Comorbidity	Med code	Read code	Read term
Acute Myocardial infarction	7783	323..00	ECG: myocardial infarction
Acute Myocardial infarction	26975	3233.00	ECG: antero-septal infarct.
Acute Myocardial infarction	26972	3234.00	ECG:posterior/inferior infarct
Acute Myocardial infarction	55401	3235.00	ECG: subendocardial infarct
Acute Myocardial infarction	52705	3236.00	ECG: lateral infarction
Acute Myocardial infarction	59032	323Z.00	ECG: myocardial infarct NOS
Acute Myocardial infarction	61670	889A.00	Diab mellit insulin-glucose infus acute myocardial infarct
Acute Myocardial infarction	241	G30..00	Acute myocardial infarction
Acute Myocardial infarction	13566	G30..11	Attack - heart
Acute Myocardial infarction	2491	G30..12	Coronary thrombosis
Acute Myocardial infarction	30421	G30..13	Cardiac rupture following myocardial infarction (MI)
Acute Myocardial infarction	1204	G30..14	Heart attack
Acute Myocardial infarction	1677	G30..15	MI - acute myocardial infarction
Acute Myocardial infarction	13571	G30..16	Thrombosis - coronary
Acute Myocardial infarction	17689	G30..17	Silent myocardial infarction
Acute Myocardial infarction	12139	G300.00	Acute anterolateral infarction
Acute Myocardial infarction	5387	G301.00	Other specified anterior myocardial infarction
Acute Myocardial infarction	40429	G301000	Acute anteroapical infarction
Acute Myocardial infarction	17872	G301100	Acute anteroseptal infarction
Acute Myocardial infarction	14897	G301z00	Anterior myocardial infarction NOS
Acute Myocardial infarction	8935	G302.00	Acute inferolateral infarction
Acute Myocardial infarction	29643	G303.00	Acute inferoposterior infarction
Acute Myocardial infarction	23892	G304.00	Posterior myocardial infarction NOS
Acute Myocardial infarction	14898	G305.00	Lateral myocardial infarction NOS
Acute Myocardial infarction	63467	G306.00	True posterior myocardial infarction
Acute Myocardial infarction	3704	G307.00	Acute subendocardial infarction
Acute Myocardial infarction	9507	G307000	Acute non-Q wave infarction
Acute Myocardial infarction	10562	G307100	Acute non-ST segment elevation myocardial infarction
Acute Myocardial infarction	1678	G308.00	Inferior myocardial infarction NOS
Acute Myocardial infarction	30330	G309.00	Acute Q-wave infarct
Acute Myocardial infarction	17133	G30A.00	Mural thrombosis
Acute Myocardial infarction	32854	G30B.00	Acute posterolateral myocardial infarction
Acute Myocardial infarction	29758	G30X.00	Acute transmural myocardial infarction of unspecif site
Acute Myocardial infarction	12229	G30X000	Acute ST segment elevation myocardial infarction
Acute Myocardial infarction	34803	G30y.00	Other acute myocardial infarction
Acute Myocardial infarction	28736	G30y000	Acute atrial infarction
Acute Myocardial infarction	62626	G30y100	Acute papillary muscle infarction
Acute Myocardial infarction	41221	G30y200	Acute septal infarction
Acute Myocardial infarction	46017	G30yz00	Other acute myocardial infarction NOS
Acute Myocardial infarction	14658	G30z.00	Acute myocardial infarction NOS
Acute Myocardial infarction	15661	G310.11	Dressler's syndrome
Acute Myocardial infarction	68357	G31y100	Microinfarction of heart
Acute Myocardial infarction	18842	G35..00	Subsequent myocardial infarction
Acute Myocardial infarction	45809	G350.00	Subsequent myocardial infarction of anterior wall
Acute Myocardial infarction	38609	G351.00	Subsequent myocardial infarction of inferior wall
Acute Myocardial infarction	72562	G353.00	Subsequent myocardial infarction of other sites
Acute Myocardial infarction	46166	G35X.00	Subsequent myocardial infarction of unspecified site
Acute Myocardial infarction	36423	G36..00	Certain current complication follow acute myocardial infarct
Acute Myocardial infarction	24126	G360.00	Haemopericardium/current comp folow acut myocard infarct
Acute Myocardial infarction	23708	G361.00	Atrial septal defect/curr comp folow acut myocardal infarct
Acute Myocardial infarction	37657	G362.00	Ventric septal defect/curr comp fol acut myocardal infarctn
Acute Myocardial infarction	59189	G363.00	Ruptur cardiac wall w'out haemopericard/cur comp fol ac MI
Acute Myocardial infarction	59940	G364.00	Ruptur chordae tendinae/curr comp fol acute myocard infarct
Acute Myocardial infarction	69474	G365.00	Rupture papillary muscle/curr comp fol acute myocard infarct
Acute Myocardial infarction	29553	G366.00	Thrombosis atrium,auric append&vent/curr comp foll acute MI
Acute Myocardial infarction	32272	G38..00	Postoperative myocardial infarction
Acute Myocardial infarction	46112	G380.00	Postoperative transmural myocardial infarction anterior wall
Acute Myocardial infarction	46276	G381.00	Postoperative transmural myocardial infarction inferior wall
Acute Myocardial infarction	106812	G383.00	Postoperative transmural myocardial infarction unspec site
Acute Myocardial infarction	41835	G384.00	Postoperative subendocardial myocardial infarction
Acute Myocardial infarction	68748	G38z.00	Postoperative myocardial infarction, unspecified
Acute Myocardial infarction	35119	G501.00	Post infarction pericarditis
Acute Myocardial infarction	96838	Gyu3400	[X]Acute transmural myocardial infarction of unspecif site
Angina	6336	14A5.00	H/O: angina pectoris
Angina	57062	14AJ.00	H/O: Angina in last year
Angina	13185	662K.00	Angina control
Angina	19542	662K000	Angina control - good
Angina	15373	662K100	Angina control - poor
Angina	14782	662K200	Angina control - improving
Angina	29300	662K300	Angina control - worsening
Angina	15349	662Kz00	Angina control NOS
Angina	45960	8B27.00	Antianginal therapy
Angina	4656	G311.11	Crescendo angina
Angina	1431	G311.13	Unstable angina
Angina	19655	G311.14	Angina at rest
Angina	7347	G311100	Unstable angina
Angina	17307	G311200	Angina at rest
Angina	34328	G311300	Refractory angina
Angina	18118	G311400	Worsening angina
Angina	9276	G31y000	Acute coronary insufficiency
Angina	1430	G33..00	Angina pectoris
Angina	20095	G330.00	Angina decubitus
Angina	18125	G330000	Nocturnal angina
Angina	29902	G330z00	Angina decubitus NOS
Angina	12986	G331.00	Prinzmetal's angina
Angina	11048	G331.11	Variant angina pectoris
Angina	36854	G332.00	Coronary artery spasm
Angina	25842	G33z.00	Angina pectoris NOS
Angina	66388	G33z000	Status anginosus
Angina	7696	G33z200	Syncope anginosa
Angina	1414	G33z300	Angina on effort
Angina	32450	G33z400	Ischaemic chest pain
Angina	9555	G33z500	Post infarct angina
Angina	26863	G33z600	New onset angina
Angina	12804	G33z700	Stable angina
Angina	28554	G33zz00	Angina pectoris NOS
Angina	5413	G340.00	Coronary atherosclerosis
Angina	1344	G340.12	Coronary artery disease
Angina	7320	G343.00	Ischaemic cardiomyopathy
Angina	24540	G34y000	Chronic coronary insufficiency
Angina	39546	Gyu3000	[X]Other forms of angina pectoris
Arrhythmia	17597	327..00	ECG: supraventricular arrhythmia
Arrhythmia	3757	3272.00	ECG: atrial fibrillation
Arrhythmia	19707	328..00	ECG: ventricular arrhythmia
Arrhythmia	4924	3282.00	ECG: ventricular tachycardia
Arrhythmia	31286	3283.00	ECG: ventricular fibrillation
Arrhythmia	29371	328Z.00	ECG: ventricular arrhythmia NOS
Arrhythmia	9479	7936A00	Implant intravenous pacemaker for atrial fibrillation
Arrhythmia	105554	8CMW200	Atrial fibrillation care pathway
Arrhythmia	104529	G55A.11	Tachycardia-induced cardiomyopathy
Arrhythmia	4044	G57..00	Cardiac dysrhythmias
Arrhythmia	6503	G57..11	Cardiac arrhythmias
Arrhythmia	4940	G570.00	Paroxysmal supraventricular tachycardia
Arrhythmia	1297	G570000	Paroxysmal atrial tachycardia
Arrhythmia	23647	G570100	Paroxysmal atrioventricular tachycardia
Arrhythmia	51845	G570200	Paroxysmal junctional tachycardia
Arrhythmia	29491	G570300	Paroxysmal nodal tachycardia
Arrhythmia	35124	G570z00	Paroxysmal supraventricular tachycardia NOS
Arrhythmia	3418	G571.00	Paroxysmal ventricular tachycardia
Arrhythmia	7794	G571.11	Ventricular tachycardia
Arrhythmia	25266	G572.00	Paroxysmal tachycardia unspecified
Arrhythmia	60047	G572000	Essential paroxysmal tachycardia
Arrhythmia	70366	G572100	Bouveret-Hoffmann syndrome
Arrhythmia	1381	G572z00	Paroxysmal tachycardia NOS
Arrhythmia	2212	G573.00	Atrial fibrillation and flutter
Arrhythmia	1664	G573000	Atrial fibrillation
Arrhythmia	1757	G573100	Atrial flutter
Arrhythmia	1268	G573200	Paroxysmal atrial fibrillation
Arrhythmia	35127	G573300	Non-rheumatic atrial fibrillation
Arrhythmia	96277	G573400	Permanent atrial fibrillation
Arrhythmia	96076	G573500	Persistent atrial fibrillation
Arrhythmia	107472	G573600	Paroxysmal atrial flutter
Arrhythmia	23437	G573z00	Atrial fibrillation and flutter NOS
Arrhythmia	4374	G574.00	Ventricular fibrillation and flutter
Arrhythmia	4827	G574000	Ventricular fibrillation
Arrhythmia	5484	G574100	Ventricular flutter
Arrhythmia	41916	G574z00	Ventricular fibrillation and flutter NOS
Arrhythmia	9023	G576300	Atrial premature depolarization
Arrhythmia	29654	G576400	Junctional premature depolarization
Arrhythmia	31809	G576500	Ventricular premature depolarization
Arrhythmia	8651	G57y600	Nodal rhythm disorder
Arrhythmia	1536	G57y900	Supraventricular tachycardia NOS
Arrhythmia	31690	G57yA00	Re-entry ventricular arrhythmia
Arrhythmia	53893	Gyu5a00	[X]Other specified cardiac arrhythmias
Chronic heart failure	15058	14A6.00	H/O: heart failure
Chronic heart failure	46912	14AM.00	H/O: heart failure in last year
Chronic heart failure	9913	1O1..00	Heart failure confirmed
Chronic heart failure	7251	33BA.00	Impaired Left Ventricular Function
Chronic heart failure	106198	661M500	Heart failure self-management plan agreed
Chronic heart failure	18853	662f.00	NYHA class f - i
Chronic heart failure	13189	662g.00	New York Heart Association classification - class II
Chronic heart failure	19066	662h.00	New York Heart Association classification - class III
Chronic heart failure	51214	662i.00	New York Heart Association classification - class IV
Chronic heart failure	83502	662p.00	Heart failure 6 month review
Chronic heart failure	12366	662T.00	Congestive heart failure monitoring
Chronic heart failure	30779	662W.00	Heart failure annual review
Chronic heart failure	105002	679W100	Education about deterioting heart failure
Chronic heart failure	24503	8B29.00	Cardiac failure therapy
Chronic heart failure	105542	8CeC.00	Preferred place of care for next exacerbation heart failure
Chronic heart failure	32945	8CL3.00	Heart failure care plan discussed with patient
Chronic heart failure	103732	8CMK.00	Has heart failure management plan
Chronic heart failure	17851	8HBE.00	Heart failure follow-up
Chronic heart failure	70619	8HHz.00	Referral to heart failure exercice programme
Chronic heart failure	48897	8HZL.00	Referral to heart failure clinic
Chronic heart failure	69062	9NT6T.00	Referred by heart failure nurse specialist
Chronic heart failure	52127	G211100	Benign hypertensive heart disease with CCF
Chronic heart failure	62718	G21z100	Hypertensive heart disease NOS with CCF
Chronic heart failure	21837	G232.00	Hypertensive heart&renal dis wth (congestive) heart failure
Chronic heart failure	57987	G234.00	Hyperten heat&renal dis+both(congestv)heart and renal fail
Chronic heart failure	3204	G55.00	Cardiomiopathy
Chronic heart failure	8010	G551.00	Hypertrophic obstructive cardiomyopathy
Chronic heart failure	7535	G554400	Primary dilated cardiomyopathy
Chronic heart failure	3499	G554300	Hypertrophic non-obstructive cardiomyopathy
Chronic heart failure	2062	G58..00	Heart failure
Chronic heart failure	1223	G58..11	Cardiac failure
Chronic heart failure	398	G580.00	Congestive heart failure
Chronic heart failure	2906	G580.11	Congestive cardiac failure
Chronic heart failure	10079	G580.12	Right heart failure
Chronic heart failure	10154	G580.13	Right ventricular failure
Chronic heart failure	9524	G580.14	Biventricular failure
Chronic heart failure	32671	G580100	Chronic congestive heart failure
Chronic heart failure	27884	G580200	Decompensated cardiac failure
Chronic heart failure	11424	G580300	Compensated cardiac failure
Chronic heart failure	94870	G580400	Congestive heart failure due to valvular disease
Chronic heart failure	884	G581.00	Left ventricular failure
Chronic heart failure	5942	G581.13	Impaired left ventricular function
Chronic heart failure	101138	G583.00	Heart failure with normal ejection fraction
Chronic heart failure	101137	G583.11	HFNEF - heart failure with normal ejection fraction
Chronic heart failure	106897	G583.12	Heart failure with preserved ejection fraction
Chronic heart failure	104275	G584.00	Right ventricular failure
Chronic heart failure	4024	G58z.00	Heart failure NOS
Chronic heart failure	17278	G58z.12	Cardiac failure NOS
Chronic heart failure	8966	G5yy900	Left ventricular systolic dysfunction
Chronic heart failure	12550	G5yyA00	Left ventricular diastolic dysfunction
Chronic heart failure	66306	SP11111	Heart failure as a complication of care
Diabetes type 1	102704	66At000	Type I diabetic dietary review
Diabetes type 1	104453	66At011	Type 1 diabetic dietary review
Diabetes type 2	101801	66At100	Type II diabetic dietary review
Diabetes type 2	102611	66At111	Type 2 diabetic dietary review
Diabetes type 2	110344	66o2.00	Diabetic on non-insulin injectable medication
Diabetes type 1	110379	66o5.00	Diabetic on oral treatment and glucagon-like peptide 1
Diabetes type 1	111483	66o6.00	Diabetic on insulin and glucagon-like peptide 1
Diabetes type 2	506	C100112	Non-insulin dependent diabetes mellitus
Diabetes type 1	17858	C108.12	Type 1 diabetes mellitus
Diabetes type 1	24423	C108.13	Type I diabetes mellitus
Diabetes type 1	61344	C108011	Type I diabetes mellitus with renal complications
Diabetes type 1	21983	C108012	Type 1 diabetes mellitus with renal complications
Diabetes type 1	102740	C108112	Type 1 diabetes mellitus with ophthalmic complications
Diabetes type 1	49146	C108211	Type I diabetes mellitus with neurological complications
Diabetes type 1	61829	C108212	Type 1 diabetes mellitus with neurological complications
Diabetes type 1	108007	C108311	Type I diabetes mellitus with multiple complications
Diabetes type 1	60107	C108411	Unstable type I diabetes mellitus
Diabetes type 1	97474	C108412	Unstable type 1 diabetes mellitus
Diabetes type 1	51957	C108511	Type I diabetes mellitus with ulcer
Diabetes type 1	68390	C108512	Type 1 diabetes mellitus with ulcer
Diabetes type 1	38161	C108711	Type I diabetes mellitus with retinopathy
Diabetes type 1	41049	C108712	Type 1 diabetes mellitus with retinopathy
Diabetes type 1	46850	C108811	Type I diabetes mellitus - poor control
Diabetes type 1	45914	C108812	Type 1 diabetes mellitus - poor control
Diabetes type 1	63017	C108911	Type I diabetes mellitus maturity onset
Diabetes type 1	97446	C108912	Type 1 diabetes mellitus maturity onset
Diabetes type 1	95992	C108A11	Type I diabetes mellitus without complication
Diabetes type 1	111106	C108A12	Type 1 diabetes mellitus without complication
Diabetes type 1	99231	C108B11	Type I diabetes mellitus with mononeuropathy
Diabetes type 1	66872	C108D11	Type I diabetes mellitus with nephropathy
Diabetes type 1	42729	C108E11	Type I diabetes mellitus with hypoglycaemic coma
Diabetes type 1	70766	C108E12	Type 1 diabetes mellitus with hypoglycaemic coma
Diabetes type 1	17545	C108F11	Type I diabetes mellitus with diabetic cataract
Diabetes type 1	110400	C108F12	Type 1 diabetes mellitus with diabetic cataract
Diabetes type 1	62352	C108H11	Type I diabetes mellitus with arthropathy
Diabetes type 1	60208	C108J11	Type I diabetes mellitus with neuropathic arthropathy
Diabetes type 1	18230	C108J12	Type 1 diabetes mellitus with neuropathic arthropathy
Diabetes type 2	4513	C109.00	Non-insulin dependent diabetes mellitus
Diabetes type 2	5884	C109.11	NIDDM - Non-insulin dependent diabetes mellitus
Diabetes type 2	17859	C109.12	Type 2 diabetes mellitus
Diabetes type 2	18219	C109.13	Type II diabetes mellitus
Diabetes type 2	52303	C109000	Non-insulin-dependent diabetes mellitus with renal comps
Diabetes type 2	50225	C109011	Type II diabetes mellitus with renal complications
Diabetes type 2	18209	C109012	Type 2 diabetes mellitus with renal complications
Diabetes type 2	50429	C109100	Non-insulin-dependent diabetes mellitus with ophthalm comps
Diabetes type 2	59725	C109111	Type II diabetes mellitus with ophthalmic complications
Diabetes type 2	70316	C109112	Type 2 diabetes mellitus with ophthalmic complications
Diabetes type 2	55842	C109200	Non-insulin-dependent diabetes mellitus with neuro comps
Diabetes type 2	67905	C109211	Type II diabetes mellitus with neurological complications
Diabetes type 2	45919	C109212	Type 2 diabetes mellitus with neurological complications
Diabetes type 2	62146	C109300	Non-insulin-dependent diabetes mellitus with multiple comps
Diabetes type 2	108005	C109312	Type 2 diabetes mellitus with multiple complications
Diabetes type 2	34912	C109400	Non-insulin dependent diabetes mellitus with ulcer
Diabetes type 2	55075	C109411	Type II diabetes mellitus with ulcer
Diabetes type 2	65704	C109412	Type 2 diabetes mellitus with ulcer
Diabetes type 2	40401	C109500	Non-insulin dependent diabetes mellitus with gangrene
Diabetes type 2	62107	C109511	Type II diabetes mellitus with gangrene
Diabetes type 2	46150	C109512	Type 2 diabetes mellitus with gangrene
Diabetes type 2	17262	C109600	Non-insulin-dependent diabetes mellitus with retinopathy
Diabetes type 2	58604	C109611	Type II diabetes mellitus with retinopathy
Diabetes type 2	42762	C109612	Type 2 diabetes mellitus with retinopathy
Diabetes type 2	8403	C109700	Non-insulin dependent diabetes mellitus - poor control
Diabetes type 2	24458	C109711	Type II diabetes mellitus - poor control
Diabetes type 2	45913	C109712	Type 2 diabetes mellitus - poor control
Diabetes type 2	29979	C109900	Non-insulin-dependent diabetes mellitus without complication
Diabetes type 2	109103	C109911	Type II diabetes mellitus without complication
Diabetes type 2	105784	C109912	Type 2 diabetes mellitus without complication
Diabetes type 2	72320	C109A00	Non-insulin dependent diabetes mellitus with mononeuropathy
Diabetes type 2	50813	C109A11	Type II diabetes mellitus with mononeuropathy
Diabetes type 2	45467	C109B00	Non-insulin dependent diabetes mellitus with polyneuropathy
Diabetes type 2	47409	C109B11	Type II diabetes mellitus with polyneuropathy
Diabetes type 2	109865	C109B12	Type 2 diabetes mellitus with polyneuropathy
Diabetes type 2	59365	C109C00	Non-insulin dependent diabetes mellitus with nephropathy
Diabetes type 2	64571	C109C11	Type II diabetes mellitus with nephropathy
Diabetes type 2	24836	C109C12	Type 2 diabetes mellitus with nephropathy
Diabetes type 2	43785	C109D00	Non-insulin dependent diabetes mellitus with hypoglyca coma
Diabetes type 2	56268	C109D11	Type II diabetes mellitus with hypoglycaemic coma
Diabetes type 2	61071	C109D12	Type 2 diabetes mellitus with hypoglycaemic coma
Diabetes type 2	69278	C109E00	Non-insulin depend diabetes mellitus with diabetic cataract
Diabetes type 2	48192	C109E11	Type II diabetes mellitus with diabetic cataract
Diabetes type 2	44779	C109E12	Type 2 diabetes mellitus with diabetic cataract
Diabetes type 2	54899	C109F11	Type II diabetes mellitus with peripheral angiopathy
Diabetes type 2	60699	C109F12	Type 2 diabetes mellitus with peripheral angiopathy
Diabetes type 2	24693	C109G00	Non-insulin dependent diabetes mellitus with arthropathy
Diabetes type 2	18143	C109G11	Type II diabetes mellitus with arthropathy
Diabetes type 2	49869	C109G12	Type 2 diabetes mellitus with arthropathy
Diabetes type 2	47816	C109H11	Type II diabetes mellitus with neuropathic arthropathy
Diabetes type 2	66965	C109H12	Type 2 diabetes mellitus with neuropathic arthropathy
Diabetes type 2	18278	C109J00	Insulin treated Type 2 diabetes mellitus
Diabetes type 2	37648	C109J11	Insulin treated non-insulin dependent diabetes mellitus
Diabetes type 2	18264	C109J12	Insulin treated Type II diabetes mellitus
Diabetes type 2	36633	C109K00	Hyperosmolar non-ketotic state in type 2 diabetes mellitus
Diabetes type 1	98392	C10C.12	Maturity onset diabetes in youth type 1
Diabetes type 2	36695	C10D.00	Diabetes mellitus autosomal dominant type 2
Diabetes type 2	59991	C10D.11	Maturity onset diabetes in youth type 2
Diabetes type 1	1549	C10E.00	Type 1 diabetes mellitus
Diabetes type 1	12455	C10E.11	Type I diabetes mellitus
Diabetes type 1	47582	C10E000	Type 1 diabetes mellitus with renal complications
Diabetes type 1	109837	C10E011	Type I diabetes mellitus with renal complications
Diabetes type 1	47649	C10E100	Type 1 diabetes mellitus with ophthalmic complications
Diabetes type 1	99311	C10E111	Type I diabetes mellitus with ophthalmic complications
Diabetes type 1	42831	C10E200	Type 1 diabetes mellitus with neurological complications
Diabetes type 1	47650	C10E300	Type 1 diabetes mellitus with multiple complications
Diabetes type 1	91942	C10E311	Type I diabetes mellitus with multiple complications
Diabetes type 1	43921	C10E400	Unstable type 1 diabetes mellitus
Diabetes type 1	49949	C10E411	Unstable type I diabetes mellitus
Diabetes type 1	18683	C10E500	Type 1 diabetes mellitus with ulcer
Diabetes type 1	93878	C10E511	Type I diabetes mellitus with ulcer
Diabetes type 1	69993	C10E600	Type 1 diabetes mellitus with gangrene
Diabetes type 1	102112	C10E611	Type I diabetes mellitus with gangrene
Diabetes type 1	18387	C10E700	Type 1 diabetes mellitus with retinopathy
Diabetes type 1	95343	C10E711	Type I diabetes mellitus with retinopathy
Diabetes type 1	35288	C10E800	Type 1 diabetes mellitus - poor control
Diabetes type 1	105337	C10E811	Type I diabetes mellitus - poor control
Diabetes type 1	40682	C10E900	Type 1 diabetes mellitus maturity onset
Diabetes type 1	96235	C10E911	Type I diabetes mellitus maturity onset
Diabetes type 1	69676	C10EA00	Type 1 diabetes mellitus without complication
Diabetes type 1	62613	C10EA11	Type I diabetes mellitus without complication
Diabetes type 1	68105	C10EB00	Type 1 diabetes mellitus with mononeuropathy
Diabetes type 1	46301	C10EC00	Type 1 diabetes mellitus with polyneuropathy
Diabetes type 1	91943	C10EC11	Type I diabetes mellitus with polyneuropathy
Diabetes type 1	10418	C10ED00	Type 1 diabetes mellitus with nephropathy
Diabetes type 1	39070	C10EE00	Type 1 diabetes mellitus with hypoglycaemic coma
Diabetes type 1	49554	C10EF00	Type 1 diabetes mellitus with diabetic cataract
Diabetes type 1	93468	C10EG00	Type 1 diabetes mellitus with peripheral angiopathy
Diabetes type 1	18642	C10EH00	Type 1 diabetes mellitus with arthropathy
Diabetes type 1	54008	C10EJ00	Type 1 diabetes mellitus with neuropathic arthropathy
Diabetes type 1	30323	C10EK00	Type 1 diabetes mellitus with persistent proteinuria
Diabetes type 1	30294	C10EL00	Type 1 diabetes mellitus with persistent microalbuminuria
Diabetes type 1	102620	C10EL11	Type I diabetes mellitus with persistent microalbuminuria
Diabetes type 1	10692	C10EM00	Type 1 diabetes mellitus with ketoacidosis
Diabetes type 1	62209	C10EM11	Type I diabetes mellitus with ketoacidosis
Diabetes type 1	40837	C10EN00	Type 1 diabetes mellitus with ketoacidotic coma
Diabetes type 1	66145	C10EN11	Type I diabetes mellitus with ketoacidotic coma
Diabetes type 1	22871	C10EP00	Type 1 diabetes mellitus with exudative maculopathy
Diabetes type 1	97894	C10EP11	Type I diabetes mellitus with exudative maculopathy
Diabetes type 1	55239	C10EQ00	Type 1 diabetes mellitus with gastroparesis
Diabetes type 1	108724	C10EQ11	Type I diabetes mellitus with gastroparesis
Diabetes type 2	758	C10F.00	Type 2 diabetes mellitus
Diabetes type 2	22884	C10F.11	Type II diabetes mellitus
Diabetes type 2	18777	C10F000	Type 2 diabetes mellitus with renal complications
Diabetes type 2	57278	C10F011	Type II diabetes mellitus with renal complications
Diabetes type 2	47321	C10F100	Type 2 diabetes mellitus with ophthalmic complications
Diabetes type 2	100964	C10F111	Type II diabetes mellitus with ophthalmic complications
Diabetes type 2	34268	C10F200	Type 2 diabetes mellitus with neurological complications
Diabetes type 2	98616	C10F211	Type II diabetes mellitus with neurological complications
Diabetes type 2	65267	C10F300	Type 2 diabetes mellitus with multiple complications
Diabetes type 2	43227	C10F311	Type II diabetes mellitus with multiple complications
Diabetes type 2	49074	C10F400	Type 2 diabetes mellitus with ulcer
Diabetes type 2	91646	C10F411	Type II diabetes mellitus with ulcer
Diabetes type 2	12736	C10F500	Type 2 diabetes mellitus with gangrene
Diabetes type 2	104323	C10F511	Type II diabetes mellitus with gangrene
Diabetes type 2	18496	C10F600	Type 2 diabetes mellitus with retinopathy
Diabetes type 2	49655	C10F611	Type II diabetes mellitus with retinopathy
Diabetes type 2	25627	C10F700	Type 2 diabetes mellitus - poor control
Diabetes type 2	47315	C10F711	Type II diabetes mellitus - poor control
Diabetes type 2	47954	C10F900	Type 2 diabetes mellitus without complication
Diabetes type 2	53392	C10F911	Type II diabetes mellitus without complication
Diabetes type 2	62674	C10FA00	Type 2 diabetes mellitus with mononeuropathy
Diabetes type 2	95351	C10FA11	Type II diabetes mellitus with mononeuropathy
Diabetes type 2	18425	C10FB00	Type 2 diabetes mellitus with polyneuropathy
Diabetes type 2	50527	C10FB11	Type II diabetes mellitus with polyneuropathy
Diabetes type 2	12640	C10FC00	Type 2 diabetes mellitus with nephropathy
Diabetes type 2	102201	C10FC11	Type II diabetes mellitus with nephropathy
Diabetes type 2	46917	C10FD00	Type 2 diabetes mellitus with hypoglycaemic coma
Diabetes type 2	98723	C10FD11	Type II diabetes mellitus with hypoglycaemic coma
Diabetes type 2	44982	C10FE00	Type 2 diabetes mellitus with diabetic cataract
Diabetes type 2	93727	C10FE11	Type II diabetes mellitus with diabetic cataract
Diabetes type 2	37806	C10FF00	Type 2 diabetes mellitus with peripheral angiopathy
Diabetes type 2	104639	C10FF11	Type II diabetes mellitus with peripheral angiopathy
Diabetes type 2	59253	C10FG00	Type 2 diabetes mellitus with arthropathy
Diabetes type 2	103902	C10FG11	Type II diabetes mellitus with arthropathy
Diabetes type 2	35385	C10FH00	Type 2 diabetes mellitus with neuropathic arthropathy
Diabetes type 2	109197	C10FH11	Type II diabetes mellitus with neuropathic arthropathy
Diabetes type 2	1407	C10FJ00	Insulin treated Type 2 diabetes mellitus
Diabetes type 2	64668	C10FJ11	Insulin treated Type II diabetes mellitus
Diabetes type 2	34450	C10FK00	Hyperosmolar non-ketotic state in type 2 diabetes mellitus
Diabetes type 2	107701	C10FK11	Hyperosmolar non-ketotic state in type II diabetes mellitus
Diabetes type 2	26054	C10FL00	Type 2 diabetes mellitus with persistent proteinuria
Diabetes type 2	60796	C10FL11	Type II diabetes mellitus with persistent proteinuria
Diabetes type 2	18390	C10FM00	Type 2 diabetes mellitus with persistent microalbuminuria
Diabetes type 2	85991	C10FM11	Type II diabetes mellitus with persistent microalbuminuria
Diabetes type 2	32627	C10FN00	Type 2 diabetes mellitus with ketoacidosis
Diabetes type 2	106528	C10FN11	Type II diabetes mellitus with ketoacidosis
Diabetes type 2	51756	C10FP00	Type 2 diabetes mellitus with ketoacidotic coma
Diabetes type 2	106061	C10FP11	Type II diabetes mellitus with ketoacidotic coma
Diabetes type 2	25591	C10FQ00	Type 2 diabetes mellitus with exudative maculopathy
Diabetes type 2	111798	C10FQ11	Type II diabetes mellitus with exudative maculopathy
Diabetes type 2	63690	C10FR00	Type 2 diabetes mellitus with gastroparesis
Diabetes type 1	108360	C10P000	Type I diabetes mellitus in remission
Diabetes type 1	109628	C10P011	Type 1 diabetes mellitus in remission
Diabetes type 2	107824	C10P100	Type II diabetes mellitus in remission
Diabetes type 2	110611	C10P111	Type 2 diabetes mellitus in remission
Dyslipidemia	14781	44O4.00	Serum lipids high
Dyslipidemia	856	44O6.00	Lipids abnormal
Dyslipidemia	2493	44P3.00	Serum cholesterol raised
Dyslipidemia	35720	44P4.00	Serum cholesterol very high
Dyslipidemia	26941	44Q3.00	Serum triglycerides raised
Dyslipidemia	104226	66X0.00	Lipid disorder treatment started
Dyslipidemia	110480	66X1.00	Lipid disorder treatment stopped
Dyslipidemia	105093	66X2.00	Lipid disorder treatment changed
Dyslipidemia	16937	8B28.00	Lipid lowering therapy
Dyslipidemia	10783	8BAG.00	Cholesterol reduction programme
Dyslipidemia	39147	8BAG000	Cholesterol reduction programme - invited
Dyslipidemia	51023	8BAG100	Cholesterol reduction program - attended
Dyslipidemia	10899	8BAG200	Cholesterol reduction program - declined
Dyslipidemia	32244	8BG2.00	Lipid lowering therapy indicated
Dyslipidemia	12111	8BL1.00	Patient on maximal tolerated lipid lowering therapy
Dyslipidemia	71747	8CR3.00	Hyperlipidaemia clinical management plan
Dyslipidemia	45020	8I2C.00	Lipid lowering therapy contraindicated
Dyslipidemia	36806	9Oc..00	Lipid disorder monitoring administration
Dyslipidemia	18708	C32..11	Disorder of cholesterol metabolism
Dyslipidemia	339	C320.00	Pure hypercholesterolaemia
Dyslipidemia	3484	C320.11	Familial hypercholesterolaemia
Dyslipidemia	55855	C320.12	Fredrickson type IIa lipidaemia
Dyslipidemia	59095	C320.13	Low density lipoproteinaemia
Dyslipidemia	3386	C320000	Familial hypercholesterolaemia
Dyslipidemia	34825	C320100	Hyperbetalipoproteinaemia
Dyslipidemia	26019	C320200	Hyperlipidaemia, group A
Dyslipidemia	34224	C320300	Low-density-lipoprotein-type (LDL) hyperlipoproteinaemia
Dyslipidemia	37273	C320400	Fredrickson's hyperlipoproteinaemia, type IIa
Dyslipidemia	97989	C320500	Familial defective apolipoprotein B-100
Dyslipidemia	102958	C320600	Polygenic hypercholesterolaemia
Dyslipidemia	53091	C320y00	Other specified pure hypercholesterolaemia
Dyslipidemia	7447	C320z00	Pure hypercholesterolaemia NOS
Dyslipidemia	1173	C321.00	Pure hyperglyceridaemia
Dyslipidemia	54499	C321.11	Fredrickson type IV lipidaemia
Dyslipidemia	99456	C321.12	Very low density lipoprotinaemia
Dyslipidemia	12439	C321000	Hypertriglyceridaemia
Dyslipidemia	5791	C322.00	Mixed hyperlipidaemia
Dyslipidemia	52992	C322.11	Fredrickson type IIb lipidaemia
Dyslipidemia	59564	C322.12	Fredrickson type III lipidaemia
Dyslipidemia	4833	C322.13	Xanthoma tuberosum
Dyslipidemia	102390	C322000	Familial combined hyperlipidaemia
Dyslipidemia	35063	C323.00	Hyperchylomicronaemia
Dyslipidemia	64718	C323.11	Burger - Grute syndrome
Dyslipidemia	69881	C323.12	Fredrickson type I lipaemia
Dyslipidemia	104941	C323.13	Fredrickson type V lipaemia
Dyslipidemia	637	C324.00	Hyperlipidaemia NOS
Dyslipidemia	107252	C329.00	Hypercholesterolaemia
Dyslipidemia	66240	Cyu8D00	[X]Other hyperlipidaemia
Dyslipidemia	50923	U60C600	[X]Antihyperlipidaem/antiarterioscl drg caus adv ef ther use
Dyslipidemia	46286	U60C900	[X]Lipid-lowering drug adverse reaction
Hypertension	32976	6146200	Hypertension induced by oral contraceptive pill
Hypertension	16565	6627.00	Good hypertension control
Hypertension	27511	6628.00	Poor hypertension control
Hypertension	18590	662b.00	Moderate hypertension control
Hypertension	21826	662F.00	Hypertension treatm. started
Hypertension	13188	662G.00	Hypertensive treatm.changed
Hypertension	12948	662H.00	Hypertension treatm.stopped
Hypertension	3425	662O.00	On treatment for hypertension
Hypertension	85944	7Q01.00	High cost hypertension drugs
Hypertension	101649	7Q01y00	Other specified high cost hypertension drugs
Hypertension	18057	8B26.00	Antihypertensive therapy
Hypertension	11056	8BL0.00	Patient on maximal tolerated antihypertensive therapy
Hypertension	204	G2...00	Hypertensive disease
Hypertension	8732	G2...11	BP - hypertensive disease
Hypertension	799	G20..00	Essential hypertension
Hypertension	351	G20..11	High blood pressure
Hypertension	107704	G20..12	Primary hypertension
Hypertension	15377	G200.00	Malignant essential hypertension
Hypertension	1894	G201.00	Benign essential hypertension
Hypertension	4372	G202.00	Systolic hypertension
Hypertension	83473	G203.00	Diastolic hypertension
Hypertension	10818	G20z.00	Essential hypertension NOS
Hypertension	3712	G20z.11	Hypertension NOS
Hypertension	7329	G24..00	Secondary hypertension
Hypertension	31755	G240.00	Secondary malignant hypertension
Hypertension	59383	G240000	Secondary malignant renovascular hypertension
Hypertension	73293	G240z00	Secondary malignant hypertension NOS
Hypertension	57288	G241.00	Secondary benign hypertension
Hypertension	25371	G241000	Secondary benign renovascular hypertension
Hypertension	51635	G241z00	Secondary benign hypertension NOS
Hypertension	34744	G244.00	Hypertension secondary to endocrine disorders
Hypertension	16059	G24z.00	Secondary hypertension NOS
Hypertension	31387	G24z000	Secondary renovascular hypertension NOS
Hypertension	31341	G24z100	Hypertension secondary to drug
Hypertension	42229	G24zz00	Secondary hypertension NOS
Hypertension	105371	G25..00	Stage 1 hypertension (NICE - Nat Ins for Hth Clin Excl 2011)
Hypertension	105316	G25..11	Stage 1 hypertension
Hypertension	105989	G26..00	Severe hypertension (Nat Inst for Health Clinical Ex 2011)
Hypertension	105487	G26..11	Severe hypertension
Hypertension	105480	G27..00	Hypertension resistant to drug therapy
Hypertension	105274	G28..00	Stage 2 hypertension (NICE - Nat Ins for Hth Clin Excl 2011)
Hypertension	18765	G2y..00	Other specified hypertensive disease
Hypertension	7057	G2z..00	Hypertensive disease NOS
Hypertension	69753	Gyu2.00	[X]Hypertensive diseases
Hypertension	102458	Gyu2000	[X]Other secondary hypertension
Hypertension	97533	Gyu2100	[X]Hypertension secondary to other renal disorders
Peripheral vascular disease	18499	662U.00	Peripheral vascular disease monitoring
Peripheral vascular disease	106224	9m1..00	Peripheral vascular disease monitoring invitation
Peripheral vascular disease	106260	9m10.00	Peripheral vascular disease monitoring first letter
Peripheral vascular disease	106660	9m11.00	Peripheral vascular disease monitoring second letter
Peripheral vascular disease	106855	9m12.00	Peripheral vascular disease monitoring third letter
Peripheral vascular disease	5943	G73..00	Other peripheral vascular disease
Peripheral vascular disease	5702	G73..11	Peripheral ischaemic vascular disease
Peripheral vascular disease	1826	G73..12	Ischaemia of legs
Peripheral vascular disease	6827	G73..13	Peripheral ischaemia
Peripheral vascular disease	1231	G730.00	Raynaud's syndrome
Peripheral vascular disease	1002	G730000	Raynaud's disease
Peripheral vascular disease	5595	G730100	Raynaud's phenomenon
Peripheral vascular disease	23880	G730111	Vibratory white finger
Peripheral vascular disease	39097	G730z00	Raynaud's syndrome NOS
Peripheral vascular disease	34638	G731.00	Thromboangiitis obliterans
Peripheral vascular disease	23497	G731000	Buerger's disease
Peripheral vascular disease	40068	G731100	Presenile gangrene
Peripheral vascular disease	67401	G731z00	Thromboangiitis obliterans NOS
Peripheral vascular disease	98174	G733.00	Ischaemic foot
Peripheral vascular disease	105317	G734.00	Peripheral arterial disease
Peripheral vascular disease	3530	G73z.00	Peripheral vascular disease NOS
Peripheral vascular disease	1517	G73z000	Intermittent claudication
Peripheral vascular disease	101866	G73z012	Vascular claudication
Peripheral vascular disease	2760	G73zz00	Peripheral vascular disease NOS
Chronic renal failure	29013	1Z10.00	Chronic kidney disease stage 1
Chronic renal failure	12586	1Z11.00	Chronic kidney disease stage 2
Chronic renal failure	12566	1Z12.00	Chronic kidney disease stage 3
Chronic renal failure	12479	1Z13.00	Chronic kidney disease stage 4
Chronic renal failure	12585	1Z14.00	Chronic kidney disease stage 5
Chronic renal failure	71271	9Ot..00	Chronic kidney disease monitoring administration
Chronic renal failure	30739	9Ot0.00	Chronic kidney disease monitoring first letter
Chronic renal failure	72962	9Ot1.00	Chronic kidney disease monitoring second letter
Chronic renal failure	72964	9Ot2.00	Chronic kidney disease monitoring third letter
Chronic renal failure	88494	9Ot3.00	Chronic kidney disease monitoring verbal invite
Chronic renal failure	69679	9Ot4.00	Chronic kidney disease monitoring telephone invite
Chronic renal failure	2475	C104.11	Diabetic nephropathy
Chronic renal failure	35107	C104z00	Diabetes mellitus with nephropathy NOS
Chronic renal failure	16929	D215.00	Anaemia secondary to renal failure
Chronic renal failure	25394	D215000	Anaemia secondary to chronic renal failure
Chronic renal failure	32423	G222.00	Hypertensive renal disease with renal failure
Chronic renal failure	28684	G233.00	Hypertensive heart and renal disease with renal failure
Chronic renal failure	112548	K01w111	Nephrotic syndrome with pseudohermaphroditism
Chronic renal failure	512	K05..00	Chronic renal failure
Chronic renal failure	53852	K05..12	End stage renal failure
Chronic renal failure	104981	K05..13	Chronic kidney disease
Chronic renal failure	6712	K050.00	End stage renal failure
Chronic renal failure	105392	K051.00	Chronic kidney disease stage 1
Chronic renal failure	105383	K052.00	Chronic kidney disease stage 2
Chronic renal failure	104619	K053.00	Chronic kidney disease stage 3
Chronic renal failure	104963	K054.00	Chronic kidney disease stage 4
Chronic renal failure	105151	K055.00	Chronic kidney disease stage 5
Chronic renal failure	350	K06..00	Renal failure unspecified
Chronic renal failure	107771	K06..12	Kidney failure unspecified
Chronic renal failure	11787	K060.00	Renal impairment
Chronic renal failure	6842	K060.11	Impaired renal function
Chronic renal failure	8919	K08..00	Impaired renal function disorder
Chronic renal failure	29638	K080.00	Renal osteodystrophy
Chronic renal failure	34637	K080z00	Renal osteodystrophy NOS
Chronic renal failure	30310	K081.00	Nephrogenic diabetes insipidus
Chronic renal failure	110481	K081000	Acquired nephrogenic diabetes insipidus
Chronic renal failure	39840	K08y.00	Other impaired renal function disorder
Chronic renal failure	41013	K08y300	Renal function impairment with growth failure
Chronic renal failure	105302	K08yA00	Proteinuric diabetic nephropathy
Chronic renal failure	107881	K08yA11	Clinical diabetic nephropathy
Chronic renal failure	50804	K08yz00	Other impaired renal function disorder NOS
Chronic renal failure	25980	K08z.00	Impaired renal function disorder NOS
Chronic renal failure	8330	K0D..00	End-stage renal disease
Chronic renal failure	100205	K0E..00	Acute-on-chronic renal failure
Chronic renal failure	61930	Kyu2.00	[X]Renal failure
Chronic renal failure	53940	Kyu2100	[X]Other chronic renal failure
Chronic renal failure	96819	Kyu4000	[X]Other disorders resulting/impaired renal tubular function
Smoking	54	137..00	Tobacco consumption
Smoking	93	137P.00	Cigarette smoker
Smoking	1822	1376.00	Very heavy smoker - 40+cigs/d
Smoking	1823	137P.11	Smoker
Smoking	1878	1374.00	Moderate smoker - 10-19 cigs/d
Smoking	2111	6791.00	Health ed. - smoking
Smoking	3568	1375.00	Heavy smoker - 20-39 cigs/day
Smoking	10558	137R.00	Current smoker
Smoking	31114	137b.00	Ready to stop smoking
Smoking	12964	137C.00	Keeps trying to stop smoking
Smoking	12240	137G.00	Trying to give up smoking
Smoking	12941	1372.11	Occasional smoker
Smoking	12942	137..11	Smoker - amount smoked
Smoking	12943	137J.00	Cigar smoker
Smoking	12944	1373.00	Light smoker - 1-9 cigs/day
Smoking	12945	137M.00	Rolls own cigarettes
Smoking	12947	137H.00	Pipe smoker
Smoking	12951	137Q.11	Smoking restarted
Smoking	12952	137Q.00	Smoking started
Smoking	12954	ZV4K000	[V]Tobacco use
Smoking	99838	137K000	Recently stopped smoking
Smoking	12958	1372.00	Trivial smoker - < 1 cig/day
Smoking	12960	137Z.00	Tobacco consumption NOS
Smoking	12963	137Y.00	Cigar consumption
Smoking	12965	137X.00	Cigarette consumption
Smoking	12966	137V.00	Smoking reduced
Smoking	12967	137a.00	Pipe tobacco consumption
Smoking	16717	H310100	Smokers' cough
Smoking	10211	13p..00	Smoking cessation milestones
Smoking	34126	13p0.00	Negotiated date for cessation of smoking
Smoking	18926	67H1.00	Lifestyle advice regarding smoking
Smoking	38112	13p5.00	Smoking cessation programme start date
Smoking	102951	13p8.00	Lost to smoking cessation follow-up
Smoking	30423	137c.00	Thinking about stopping smoking
Smoking	30762	137d.00	Not interested in stopping smoking
Smoking	32687	E251.00	Tobacco dependence
Smoking	32973	137W.00	Chews tobacco
Smoking	98137	67H6.00	Brief intervention for smoking cessation
Smoking	41979	137e.00	Smoking restarted
Smoking	74907	745H.00	Smoking cessation therapy
Smoking	94958	745H400	Smoking cessation drug therapy
Smoking	91708	745Hy00	Other specified smoking cessation therapy
Smoking	46300	137g.00	Cigarette pack-years
Smoking	46321	137f.00	Reason for restarting smoking
Smoking	90522	745Hz00	Smoking cessation therapy NOS
Smoking	110692	8B31G00	Varenicline smoking cessation therapy offered
Smoking	41042	8CAg.00	Smoking cessation advice provided by community pharmacist
Smoking	7622	8CAL.00	Smoking cessation advice
Smoking	103507	8CdB.00	Stop smoking service opportunity signposted
Smoking	18573	8H7i.00	Referral to smoking cessation advisor
Smoking	98245	8HBM.00	Stop smoking face to face follow-up
Smoking	98154	8HkQ.00	Referral to NHS stop smoking service
Smoking	10742	8HTK.00	Referral to stop-smoking clinic
Smoking	106359	8T08.00	Referral to smoking cessation service
Smoking	96992	9kc..00	Smoking cessation - enhanced services administration
Smoking	62686	137h.00	Minutes from waking to first tobacco consumption
Smoking	68658	E251z00	Tobacco dependence NOS
Smoking	70746	E251100	Tobacco dependence, continuous
Smoking	98347	9ko..00	Current smoker annual review - enhanced services admin
Smoking	104310	9ko..11	Current smoker annual review
Smoking	11356	9N2k.00	Seen by smoking cessation advisor
Smoking	101385	9Ndf.00	Consent given for follow-up by smoking cessation team
Smoking	101634	9NdV.00	Consent given follow-up after smoking cessation intervention
Smoking	95610	E251000	Tobacco dependence, unspecified
Smoking	101210	9NdW.00	Consent given for smoking cessation data sharing
Smoking	102361	9NS0200	Referral for smoking cessation service offered
Smoking	28834	9OO..00	Anti-smoking monitoring admin.
Smoking	32083	9OO..11	Stop smoking clinic admin.
Smoking	7130	9OO..12	Stop smoking monitoring admin.
Smoking	12953	9OO1.00	Attends stop smoking monitor.
Smoking	40417	9OO3.00	Stop smoking monitor default
Smoking	42722	9OO4.00	Stop smoking monitor 1st lettr
Smoking	60720	9OO5.00	Stop smoking monitor 2nd lettr
Smoking	66387	9OO6.00	Stop smoking monitor 3rd lettr
Smoking	53101	9OO7.00	Stop smoking monitor verb.inv.
Smoking	58597	9OO8.00	Stop smoking monitor phone inv
Smoking	19485	9OOA.00	Stop smoking monitor.chck done
Smoking	105572	9OOB.00	Stop smoking invitation short message service text message
Smoking	104086	9OOB000	Stop smoking invitation first SMS text message
Smoking	106384	9OOB100	Stop smoking invitation second SMS text message
Smoking	106385	9OOB200	Stop smoking invitation third SMS text message
Smoking	21637	9OOZ.00	Stop smoking monitor admin.NOS
Smoking	101338	137m.00	Failed attempt to stop smoking
Smoking	105999	1V08.00	Smokes drugs in cigarette form
Smoking	107593	1V09.00	Smokes drugs through a pipe
Smoking	9045	ZG23300	Advice on smoking
Smoking	107939	38Gb.00	Dyspnoea,obstruction, smoking, exacerbation frequency index
Smoking	108835	E251200	Tobacco dependence, episodic
Smoking	49418	ZRh4.11	RFS - Reasons for smoking scale
Stroke	104505	662M200	Stroke initial post discharge review
Stroke	55351	7P24200	Delivery of rehabilitation for stroke
Stroke	1786	G60..00	Subarachnoid haemorrhage
Stroke	29939	G600.00	Ruptured berry aneurysm
Stroke	56007	G601.00	Subarachnoid haemorrhage from carotid siphon and bifurcation
Stroke	19412	G602.00	Subarachnoid haemorrhage from middle cerebral artery
Stroke	42331	G603.00	Subarachnoid haemorrhage from anterior communicating artery
Stroke	9696	G604.00	Subarachnoid haemorrhage from posterior communicating artery
Stroke	41910	G605.00	Subarachnoid haemorrhage from basilar artery
Stroke	60692	G606.00	Subarachnoid haemorrhage from vertebral artery
Stroke	17326	G60X.00	Subarachnoid haemorrh from intracranial artery, unspecif
Stroke	23580	G60z.00	Subarachnoid haemorrhage NOS
Stroke	5051	G61..00	Intracerebral haemorrhage
Stroke	6960	G61..11	CVA - cerebrovascular accid due to intracerebral haemorrhage
Stroke	18604	G61..12	Stroke due to intracerebral haemorrhage
Stroke	31595	G610.00	Cortical haemorrhage
Stroke	40338	G611.00	Internal capsule haemorrhage
Stroke	46316	G612.00	Basal nucleus haemorrhage
Stroke	13564	G613.00	Cerebellar haemorrhage
Stroke	7912	G614.00	Pontine haemorrhage
Stroke	62342	G615.00	Bulbar haemorrhage
Stroke	30045	G616.00	External capsule haemorrhage
Stroke	30202	G617.00	Intracerebral haemorrhage, intraventricular
Stroke	57315	G618.00	Intracerebral haemorrhage, multiple localized
Stroke	107440	G619.00	Lobar cerebral haemorrhage
Stroke	31060	G61X.00	Intracerebral haemorrhage in hemisphere, unspecified
Stroke	28314	G61X000	Left sided intracerebral haemorrhage, unspecified
Stroke	19201	G61X100	Right sided intracerebral haemorrhage, unspecified
Stroke	3535	G61z.00	Intracerebral haemorrhage NOS
Stroke	31805	G62..00	Other and unspecified intracranial haemorrhage
Stroke	36178	G620.00	Extradural haemorrhage - nontraumatic
Stroke	4273	G621.00	Subdural haemorrhage - nontraumatic
Stroke	17734	G622.00	Subdural haematoma - nontraumatic
Stroke	18912	G623.00	Subdural haemorrhage NOS
Stroke	20284	G62z.00	Intracranial haemorrhage NOS
Stroke	23671	G63y000	Cerebral infarct due to thrombosis of precerebral arteries
Stroke	24446	G63y100	Cerebral infarction due to embolism of precerebral arteries
Stroke	8837	G64..00	Cerebral arterial occlusion
Stroke	5363	G64..11	CVA - cerebral artery occlusion
Stroke	569	G64..12	Infarction - cerebral
Stroke	6155	G64..13	Stroke due to cerebral arterial occlusion
Stroke	16517	G640.00	Cerebral thrombosis
Stroke	36717	G640000	Cerebral infarction due to thrombosis of cerebral arteries
Stroke	15019	G641.00	Cerebral embolism
Stroke	34758	G641.11	Cerebral embolus
Stroke	27975	G641000	Cerebral infarction due to embolism of cerebral arteries
Stroke	3149	G64z.00	Cerebral infarction NOS
Stroke	15252	G64z.11	Brainstem infarction NOS
Stroke	5602	G64z.12	Cerebellar infarction
Stroke	25615	G64z000	Brainstem infarction
Stroke	9985	G64z200	Left sided cerebral infarction
Stroke	10504	G64z300	Right sided cerebral infarction
Stroke	26424	G64z400	Infarction of basal ganglia
Stroke	1469	G66..00	Stroke and cerebrovascular accident unspecified
Stroke	1298	G66..11	CVA unspecified
Stroke	6253	G66..12	Stroke unspecified
Stroke	6116	G66..13	CVA - Cerebrovascular accident unspecified
Stroke	8443	G663.00	Brain stem stroke syndrome
Stroke	17322	G664.00	Cerebellar stroke syndrome
Stroke	7780	G667.00	Left sided CVA
Stroke	12833	G668.00	Right sided CVA
Stroke	40053	G671.00	Generalised ischaemic cerebrovascular disease NOS
Stroke	70536	G671000	Acute cerebrovascular insufficiency NOS
Stroke	12555	G671z00	Generalised ischaemic cerebrovascular disease NOS
Stroke	39344	G676000	Cereb infarct due cerebral venous thrombosis, nonpyogenic
Stroke	51759	G677000	Occlusion and stenosis of middle cerebral artery
Stroke	57527	G677100	Occlusion and stenosis of anterior cerebral artery
Stroke	65770	G677200	Occlusion and stenosis of posterior cerebral artery
Stroke	55602	G677300	Occlusion and stenosis of cerebellar arteries
Stroke	71274	G677400	Occlusion+stenosis of multiple and bilat cerebral arteries
Stroke	101733	G67A.00	Cerebral vein thrombosis
Peripheral vascular disease	5943	G73..00	Other peripheral vascular disease
Peripheral vascular disease	5702	G73..11	Peripheral ischaemic vascular disease
Peripheral vascular disease	1826	G73..12	Ischaemia of legs
Peripheral vascular disease	6827	G73..13	Peripheral ischaemia
Peripheral vascular disease	1231	G730.00	Raynaud's syndrome
Peripheral vascular disease	1002	G730000	Raynaud's disease
Peripheral vascular disease	5595	G730100	Raynaud's phenomenon
Peripheral vascular disease	23880	G730111	Vibratory white finger
Peripheral vascular disease	39097	G730z00	Raynaud's syndrome NOS
Peripheral vascular disease	34638	G731.00	Thromboangiitis obliterans
Peripheral vascular disease	23497	G731000	Buerger's disease
Peripheral vascular disease	40068	G731100	Presenile gangrene
Peripheral vascular disease	67401	G731z00	Thromboangiitis obliterans NOS
Peripheral vascular disease	98174	G733.00	Ischaemic foot
Peripheral vascular disease	105317	G734.00	Peripheral arterial disease
Peripheral vascular disease	3530	G73z.00	Peripheral vascular disease NOS
Peripheral vascular disease	1517	G73z000	Intermittent claudication
Peripheral vascular disease	101866	G73z012	Vascular claudication
Peripheral vascular disease	2760	G73zz00	Peripheral vascular disease NOS
Peripheral vascular disease	7975	16I..00	Claudication distance
Peripheral vascular disease	68475	7808300	Percutaneous transluminal angioplasty of blood vessel liver
Peripheral vascular disease	89355	790N200	Repair of right ventricular aneurysm
Peripheral vascular disease	87869	790N300	Repair of left ventricular aneurysm
Peripheral vascular disease	91467	791B500	Repair of aortic sinus of Valsalva aneurysm
Peripheral vascular disease	19164	7927100	Repair of aneurysm of coronary artery
Peripheral vascular disease	34963	792D.00	Other bypass of coronary artery
Peripheral vascular disease	3159	792Dy00	Other specified other bypass of coronary artery
Peripheral vascular disease	33471	792Dz00	Other bypass of coronary artery NOS
Peripheral vascular disease	23352	7A10100	Bypass aorta by anastomosis axillary to femoral artery NEC
Peripheral vascular disease	102684	7A10400	Bypass aorta anastomosis axillary artery bi femoral arteries
Peripheral vascular disease	52358	7A11.00	Replacement of aneurysmal bifurcation of aorta
Peripheral vascular disease	96654	7A11000	Emerg repl aneurysm bifurc aorta by anast aorta to fem art
Peripheral vascular disease	56495	7A11100	Replace aneurysm bifurc aorta by anast aorta to femoral art
Peripheral vascular disease	69922	7A11200	Emerg repl aneurysm bifurc aorta by anast aorta to iliac a
Peripheral vascular disease	92925	7A11211	Y graft of abdominal Aortic aneurysm (emergency)
Peripheral vascular disease	56510	7A11300	Replace aneurysm bifurc aorta by anast aorta to iliac artery
Peripheral vascular disease	51166	7A11311	Y graft abdominal Aortic aneurysm
Peripheral vascular disease	62301	7A11y00	Replacement of aneurysmal bifurcation of aorta OS
Peripheral vascular disease	66761	7A11z00	Replacement of aneurysmal bifurcation of aorta NOS
Peripheral vascular disease	36952	7A12.00	Other bypass of bifurcation of aorta
Peripheral vascular disease	48755	7A12000	Emerg bypass bifurc aorta by anast aorta to femoral artery
Peripheral vascular disease	2761	7A12100	Bypass bifurc aorta by anastom aorta to femoral artery NEC
Peripheral vascular disease	55825	7A12y00	Other specified other bypass of bifurcation of aorta
Peripheral vascular disease	64798	7A12z00	Other bypass of bifurcation of aorta NOS
Peripheral vascular disease	31613	7A13.00	Emergency replacement of aneurysmal segment of aorta
Peripheral vascular disease	99722	7A13000	Emerg replace aneurysm asc aorta by anastom aorta to aorta
Peripheral vascular disease	93060	7A13100	Emerg replace aneurysm thor aorta by anastom aorta to aorta
Peripheral vascular disease	17220	7A13.11	Emergency repair of aortic aneurysm
Peripheral vascular disease	66232	7A13300	Emerg replace aneurysm infrarenal aorta by anast aorta/aorta
Peripheral vascular disease	54192	7A13400	Emerg replace aneurysm abdom aorta by anast aorta/aorta NEC
Peripheral vascular disease	63408	7A13411	Tube graft abdominal Aortic aneurysm (emergency)
Peripheral vascular disease	45477	7A13y00	Emergency replacement of aneurysmal segment of aorta OS
Peripheral vascular disease	45474	7A13z00	Emergency replacement of aneurysmal segment of aorta NOS
Peripheral vascular disease	43108	7A14.00	Other replacement of aneurysmal segment of aorta
Peripheral vascular disease	64961	7A14000	Replace aneurysm ascend aorta by anast of aorta/aorta NEC
Peripheral vascular disease	42444	7A14100	Replace aneurysm thoracic aorta by anast of aorta/aorta NEC
Peripheral vascular disease	1736	7A14.11	Aortic aneurysm repair
Peripheral vascular disease	19996	7A14400	Replace aneurysm abdominal aorta by anast aorta to aorta NEC
Peripheral vascular disease	26232	7A14411	Tube graft of Abdominal aortic aneurysm
Peripheral vascular disease	55445	7A14y00	Other replacement of aneurysmal segment of aorta OS
Peripheral vascular disease	36651	7A14z00	Other replacement of aneurysmal segment of aorta NOS
Peripheral vascular disease	31822	7A15.00	Other emergency bypass of segment of aorta
Peripheral vascular disease	101835	7A15y00	Other specified other emergency bypass of segment of aorta
Peripheral vascular disease	104815	7A15z00	Other emergency bypass of segment of aorta NOS
Peripheral vascular disease	37639	7A16.00	Other bypass of segment of aorta
Peripheral vascular disease	59518	7A16y00	Other specified other bypass of segment of aorta
Peripheral vascular disease	42751	7A16z00	Other bypass of segment of aorta NOS
Peripheral vascular disease	66316	7A17100	Revision of prosthesis of bifurcation of aorta
Peripheral vascular disease	55402	7A19200	Open embolectomy of bifurcation of aorta
Peripheral vascular disease	33430	7A19400	Operation on aneurysm of aorta NEC
Peripheral vascular disease	30466	7A1A100	Percutaneous transluminal angioplasty of aorta NEC
Peripheral vascular disease	93959	7A1B.00	Transluminal operations on aneurysmal segment of aorta
Peripheral vascular disease	70446	7A1B000	Endovascular stenting infrarenal abdominal aortic aneurysm
Peripheral vascular disease	97030	7A1B100	Endovascular stenting of suprarenal aortic aneurysm
Peripheral vascular disease	51061	7A1B200	Endovascular stenting of thoracic aortic aneurysm
Peripheral vascular disease	95976	7A1B500	Endovascular stenting of aorto-uniiliac aneurysm
Peripheral vascular disease	100195	7A1B600	Endovascular stenting for aortic aneurysm of bifurcation NEC
Peripheral vascular disease	97109	7A1B700	Endovascular stenting for aorto-uniiliac aneurysm
Peripheral vascular disease	97217	7A1B800	Endovascul insert stent infrarenal abdominal aortic aneurysm
Peripheral vascular disease	106780	7A1B900	Endovascular insertion stent for suprarenal aortic aneurysm
Peripheral vascular disease	98542	7A1BA00	Endovascular insertion of stent for thoracic aortic aneurysm
Peripheral vascular disease	99859	7A1BC00	Endovas insert stent for aortic aneurysm of bifurcation NEC
Peripheral vascular disease	98175	7A1BD00	Endovascular insertion of stent for aorto-uniiliac aneurysm
Peripheral vascular disease	90861	7A1Bz00	Transluminal operations on aneurysmal segment of aorta NOS
Peripheral vascular disease	94331	7A1C.00	Translum insert stent graft for aneurysmal segment of aorta
Peripheral vascular disease	83577	7A1C000	Endovas ins stent graft for infrarenal abdom aortic aneurysm
Peripheral vascular disease	94682	7A1C100	Endovas insert of stent graft for suprarenal aortic aneurysm
Peripheral vascular disease	91462	7A1C200	Endov insertion of stent graft for thoracic aortic aneurysm
Peripheral vascular disease	103427	7A1C500	Endovas insertion of stent graft for aorto-uniiliac aneurysm
Peripheral vascular disease	98565	7A1Cy00	OS translum ins stent graft for aneurysmal segment of aorta
Peripheral vascular disease	93627	7A1Cz00	Translum ins stent graft for aneurysmal segment of aorta NOS
Peripheral vascular disease	36145	7A21400	Operation on aneurysm of carotid artery
Peripheral vascular disease	29973	7A22000	Percutaneous transluminal angioplasty of carotid artery
Peripheral vascular disease	53999	7A23.00	Cerebral artery and circle of Willis aneurysm operations
Peripheral vascular disease	45897	7A23000	Excision of aneurysm of cerebral artery
Peripheral vascular disease	71034	7A23100	Excision of aneurysm of circle of Willis
Peripheral vascular disease	5365	7A23.11	Cerebral artery aneurysm operations
Peripheral vascular disease	50929	7A23.12	Circle of Willis aneurysm operations
Peripheral vascular disease	10625	7A23200	Clipping of aneurysm of cerebral artery
Peripheral vascular disease	45450	7A23300	Clipping of aneurysm of circle of Willis
Peripheral vascular disease	37823	7A23400	Ligation of aneurysm of cerebral artery NEC
Peripheral vascular disease	97937	7A23500	Ligation of aneurysm of circle of Willis NEC
Peripheral vascular disease	58757	7A23600	Obliteration of aneurysm of cerebral artery NEC
Peripheral vascular disease	94491	7A23700	Obliteration of aneurysm of circle of Willis NEC
Peripheral vascular disease	30415	7A23800	Percutaneous coil embolisation of cerebral artery aneurysm
Peripheral vascular disease	63903	7A23y00	Operation on cerebral artery/ circle of Willis aneurysm OS
Peripheral vascular disease	50260	7A23z00	Operation on cerebral artery/ circle of Willis aneurysm NOS
Peripheral vascular disease	45308	7A27C00	Operation on aneurysm of subclavian artery
Peripheral vascular disease	106096	7A27D00	Operation on aneurysm of axillary artery
Peripheral vascular disease	47618	7A27E00	Operation on aneurysm of brachial artery
Peripheral vascular disease	49255	7A27F00	Operation on aneurysm of vertebral artery
Peripheral vascular disease	31723	7A28000	Percutaneous transluminal angioplasty of subclavian artery
Peripheral vascular disease	37465	7A28100	Percutaneous transluminal angioplasty of brachial artery
Peripheral vascular disease	55074	7A28200	Percutaneous transluminal angioplasty of vertebral artery
Peripheral vascular disease	60370	7A28C00	Percutaneous transluminal angioplasty of axillary artery
Peripheral vascular disease	24684	7A31300	Operation on aneurysm of renal artery
Peripheral vascular disease	25844	7A32000	Percutaneous transluminal angioplasty of renal artery
Peripheral vascular disease	91084	7A34D00	Operation on aneurysm of superior mesenteric artery NEC
Peripheral vascular disease	61042	7A34E00	Operation on aneurysm of inferior mesenteric artery NEC
Peripheral vascular disease	100025	7A34F00	Operation on aneurysm of suprarenal artery NEC
Peripheral vascular disease	66633	7A34K00	Operation on aneurysm visceral branch of abdominal aorta NEC
Peripheral vascular disease	46164	7A35000	Percutaneous transluminal angioplasty of coeliac artery NEC
Peripheral vascular disease	22880	7A35100	Percutaneous transluminal angioplasty sup mesenteric art NEC
Peripheral vascular disease	71414	7A35200	Percutaneous transluminal angioplasty inf mesenteric art NEC
Peripheral vascular disease	41220	7A35300	Percutaneous transluminal angioplasty suprarenal artery NEC
Peripheral vascular disease	59756	7A40.00	Replacement of aneurysmal iliac artery
Peripheral vascular disease	96699	7A40000	Emerg replace aneurysm iliac art by iliac/femoral art anast
Peripheral vascular disease	103347	7A40.11	Replacement of aneurysmal iliac artery by anastomosis
Peripheral vascular disease	99727	7A40A00	Replace aneurysm iliac art by aorta/ext iliac art anast NEC
Peripheral vascular disease	106488	7A40y00	Other specified replacement of aneurysmal iliac artery
Peripheral vascular disease	95503	7A40z00	Replacement of aneurysmal iliac artery NOS
Peripheral vascular disease	21927	7A41.00	Other bypass of iliac artery
Peripheral vascular disease	44250	7A41000	Emerg bypass iliac art by iliac/femoral art anastomosis NEC
Peripheral vascular disease	28616	7A41100	Bypass iliac artery by iliac/femoral artery anastomosis NEC
Peripheral vascular disease	101910	7A41.11	Other bypass of iliac artery by anastomosis
Peripheral vascular disease	72448	7A41200	Emerg bypass iliac artery by femoral/femoral art anast NEC
Peripheral vascular disease	36443	7A41300	Bypass iliac artery by femoral/femoral art anastomosis NEC
Peripheral vascular disease	32492	7A41900	Bypass common iliac artery by aorta/com iliac art anast NEC
Peripheral vascular disease	100036	7A41D00	Bypass iliac artery by iliac/iliac artery anastomosis NEC
Peripheral vascular disease	52357	7A41y00	Other specified other bypass of iliac artery
Peripheral vascular disease	38921	7A41z00	Other bypass of iliac artery NOS
Peripheral vascular disease	36065	7A42011	Endarterectomy and patch repair of common iliac artery
Peripheral vascular disease	63280	7A42.11	Reconstruction of common iliac artery
Peripheral vascular disease	44430	7A42111	Endarterectomy of common iliac artery NEC
Peripheral vascular disease	66437	7A43011	Repair of common iliac artery NEC
Peripheral vascular disease	53580	7A43.11	Other open operations on common iliac artery
Peripheral vascular disease	47562	7A43111	Open embolectomy of common iliac artery
Peripheral vascular disease	39749	7A43200	Operation on aneurysm of iliac artery NEC
Peripheral vascular disease	10827	7A44000	Percutaneous transluminal angioplasty of iliac artery
Peripheral vascular disease	59187	7A44.11	Transluminal operations on common iliac artery
Peripheral vascular disease	37577	7A44211	Arteriography of common iliac artery
Peripheral vascular disease	61666	7A45.00	Emergency replacement of aneurysmal femoral/popliteal artery
Peripheral vascular disease	55476	7A45000	Emerg replace aneurysm fem art by fem/pop art anast c prosth
Peripheral vascular disease	103988	7A45.12	Emergency replacement of aneurysmal common femoral artery
Peripheral vascular disease	46125	7A45.14	Emergency replacement of aneurysmal popliteal artery
Peripheral vascular disease	94784	7A45.15	Emergency replacement aneurysmal superficial femoral artery
Peripheral vascular disease	62025	7A45200	Emerg replace aneurysm fem art by fem/pop anast c vein graft
Peripheral vascular disease	89470	7A45700	Emerg replace aneurysm pop art by pop/tib anast c vein graft
Peripheral vascular disease	55394	7A45D00	Emerg replace aneurysm pop artery by pop/fem art anastomosis
Peripheral vascular disease	103044	7A45y00	Emergency replacement aneurysmal femoral/popliteal artery OS
Peripheral vascular disease	69346	7A46.00	Other replacement of aneurysmal femoral artery
Peripheral vascular disease	96472	7A46000	Replace aneurysm fem art by fem/pop art anastom c prosth NEC
Peripheral vascular disease	58092	7A46100	Replace aneurysm pop art by pop/pop art anastom c prosth NEC
Peripheral vascular disease	68385	7A46.11	Other replacement aneurysmal femoral artery by anastomosis
Peripheral vascular disease	44439	7A46.14	Other replacement of aneurysmal popliteal artery
Peripheral vascular disease	103731	7A46.15	Other replacement of aneurysmal superficial femoral artery
Peripheral vascular disease	71141	7A46300	Replace aneurysm pop art by pop/pop a anast c vein graft NEC
Peripheral vascular disease	97661	7A46C00	Replace aneurysm fem artery by fem/fem art anastomosis NEC
Peripheral vascular disease	95416	7A46D00	Replace aneurysm popliteal artery by pop/fem anastomosis NEC
Peripheral vascular disease	94556	7A46y00	Other replacement of aneurysmal femoral/popliteal artery OS
Peripheral vascular disease	96656	7A46z00	Other replacement of aneurysmal femoral/popliteal artery NOS
Peripheral vascular disease	9099	7A47.00	Other emergency bypass of femoral artery or popliteal artery
Peripheral vascular disease	100113	7A47.12	Other emergency bypass of common femoral artery
Peripheral vascular disease	63238	7A47.13	Other emergency bypass of deep femoral artery
Peripheral vascular disease	39776	7A47.14	Other emergency bypass of popliteal artery
Peripheral vascular disease	97606	7A47.15	Other emergency bypass of superficial femoral artery
Peripheral vascular disease	11766	7A47.16	Other emergency bypass of femoral artery
Peripheral vascular disease	48939	7A47C00	Emerg bypass femoral artery by fem/fem art anastomosis NEC
Peripheral vascular disease	65692	7A47y00	Other emergency bypass of femoral or popliteal artery OS
Peripheral vascular disease	68320	7A47z00	Other emergency bypass of femoral or popliteal artery NOS
Peripheral vascular disease	24692	7A48.00	Other bypass of femoral artery or popliteal artery
Peripheral vascular disease	27580	7A48000	Bypass femoral artery by fem/pop art anast c prosthesis NEC
Peripheral vascular disease	61974	7A48.11	Other bypass of femoral or popliteal artery by anastomosis
Peripheral vascular disease	37787	7A48.12	Other bypass of common femoral artery
Peripheral vascular disease	18060	7A48.14	Other bypass of femoral artery
Peripheral vascular disease	12331	7A48.15	Other bypass of popliteal artery
Peripheral vascular disease	40732	7A48.16	Other bypass of superficial femoral artery
Peripheral vascular disease	28030	7A48200	Bypass femoral artery by fem/pop art anast c vein graft NEC
Peripheral vascular disease	39877	7A48400	Bypass femoral artery by fem/tib art anast c prosthesis NEC
Peripheral vascular disease	41823	7A48600	Bypass femoral artery by fem/tib art anast c vein graft NEC
Peripheral vascular disease	67982	7A48800	Bypass femoral artery by fem/peron a anast c prosthesis NEC
Peripheral vascular disease	53675	7A48A00	Bypass femoral artery by fem/peron a anast c vein graft NEC
Peripheral vascular disease	45428	7A48C00	Bypass femoral artery by femoral/femoral art anastomosis NEC
Peripheral vascular disease	42640	7A48y00	Other bypass of femoral artery or popliteal artery OS
Peripheral vascular disease	2066	7A48z00	Other bypass of femoral artery or popliteal artery NOS
Peripheral vascular disease	51124	7A4A400	Ligation of aneurysm of popliteal artery
Peripheral vascular disease	28840	7A4A500	Operation on aneurysm of femoral artery NEC
Peripheral vascular disease	6356	7A4B000	Percutaneous transluminal angioplasty of femoral artery
Peripheral vascular disease	29112	7A4B100	Percutaneous transluminal angioplasty of popliteal artery
Peripheral vascular disease	3589	7A53400	Operation on aneurysm of artery NEC
Peripheral vascular disease	733	7A54000	Percutaneous transluminal angioplasty of artery NEC
Peripheral vascular disease	55604	7A58.00	Transluminal coil embolisation of aneurysm
Peripheral vascular disease	96562	7A58000	Percutaneous transluminal coil embolisation aneurysm small
Peripheral vascular disease	102306	7A58100	Percutaneous transluminal coil embolisation aneurysm medium
Peripheral vascular disease	95577	7A58300	Percutaneous transluminal coil embolisation aneurysm giant
Peripheral vascular disease	95170	7A58y00	Other specified transluminal coil embolisation of aneurysm
Peripheral vascular disease	94155	7A58z00	Transluminal coil embolisation of aneurysm NOS
Peripheral vascular disease	88788	7A59.00	Transluminal balloon assisted coil embolisation of aneurysm
Peripheral vascular disease	105179	7A59200	Perc translum balloon assist coil embolisat single aneurysm
Peripheral vascular disease	97645	7A59z00	Transluminal balloon assisted coil embolisation aneurysm NOS
Peripheral vascular disease	93083	7A5A.00	Transluminal stent assisted coil embolisation of aneurysm
Peripheral vascular disease	105868	7A5A200	Perc trans stent assisted coil embolisation single aneurysm
Peripheral vascular disease	101797	7A5Az00	Transluminal stent assisted coil embolisation aneurysm NOS
Peripheral vascular disease	89456	7A5B.00	Other transluminal embolisation of aneurysm
Peripheral vascular disease	103431	7A5B000	Percutaneous translumin liquid polymer embolisation aneurysm
Peripheral vascular disease	91887	7A5By00	Other specified other transluminal embolisation of aneurysm
Peripheral vascular disease	86065	7A5Bz00	Other transluminal embolisation of aneurysm NOS
Peripheral vascular disease	43874	7A66111	Cockett subfascial ligation of perforating varicose vein
Peripheral vascular disease	52097	7A66112	Subfascial ligation of varicose veins
Peripheral vascular disease	3654	7A67.00	Ligation of varicose vein of leg
Peripheral vascular disease	28286	7A67200	Ligation of recurrent varicose vein of leg
Peripheral vascular disease	38557	7A67300	Ligation of perforating varicose vein of leg
Peripheral vascular disease	106076	7A67311	Linton ligation of perforating varicose vein of leg
Peripheral vascular disease	25923	7A67y00	Other specified ligation of varicose vein of leg
Peripheral vascular disease	1205	7A67z00	Ligation of varicose vein of leg NOS
Peripheral vascular disease	4308	7A68.00	Injection into varicose vein of leg
Peripheral vascular disease	913	7A68000	Injection of sclerosing substance into varicose vein of leg
Peripheral vascular disease	63117	7A68200	Ultrasound guided foam sclerotherapy for varicose vein leg
Peripheral vascular disease	58984	7A68300	Transilluminated powered phlebectomy of varicose vein of leg
Peripheral vascular disease	66147	7A68400	Injection of sclerosing substance into varicose vein leg NEC
Peripheral vascular disease	63112	7A68y00	Other specified injection into varicose vein of leg
Peripheral vascular disease	29677	7A68z00	Injection into varicose vein of leg NOS
Peripheral vascular disease	905	7A69.00	Other operations on varicose vein of leg
Peripheral vascular disease	627	7A69200	Stripping of varicose vein of leg NEC
Peripheral vascular disease	57506	7A69211	Mayo stripping of varicose vein
Peripheral vascular disease	6461	7A69300	Avulsion of varicose vein of leg
Peripheral vascular disease	24519	7A69311	Babcock subcutaneous enucleation of varicose veins
Peripheral vascular disease	2148	7A69400	Local excision of varicose vein of leg
Peripheral vascular disease	49328	7A69500	Incision of varicose vein of leg
Peripheral vascular disease	63617	7A69600	Endovascular radiofrequency ablation of varicose vein of leg
Peripheral vascular disease	28898	7A69700	Endovascular laser ablation of varicose vein of leg
Peripheral vascular disease	41788	7A69y00	Other specified other operation on varicose vein of leg
Peripheral vascular disease	1773	7A69z00	Other operation on varicose vein of leg NOS
Peripheral vascular disease	92986	7A6G800	Thrombin injection for pseudoaneurysm
Peripheral vascular disease	66921	7A6H400	Percutaneous transluminal angioplasty of vascular graft
Peripheral vascular disease	69286	7A6L.00	Combined operations on varicose vein of leg
Peripheral vascular disease	96479	7A6Ly00	Other specified combined operations on varicose vein of leg
Peripheral vascular disease	89018	7A6Lz00	Combined operations on varicose vein of leg NOS
Peripheral vascular disease	90928	7A6M.00	Transluminal operations on varicose vein of leg
Peripheral vascular disease	66665	7A6M100	Radiofrequency ablation of varicose vein of leg
Peripheral vascular disease	87004	7A6M300	Perc transluminal laser ablation of varicose vein of leg NEC
Peripheral vascular disease	94913	7A6My00	Other specified transluminal operations on varicose vein leg
Peripheral vascular disease	85498	7A6Mz00	Transluminal operations on varicose vein of leg NOS
Peripheral vascular disease	90552	7A6S000	Percutaneous transluminal angioplasty of vein NEC
Peripheral vascular disease	93267	7A6T000	Duplex ultrasound guided compression of pseudoaneurysm
Peripheral vascular disease	51204	A3A0.00	Gas gangrene
Peripheral vascular disease	99592	A3A0000	Gas gangrene caused by clostridium histolyticum
Peripheral vascular disease	105609	A3A0100	Gas gangrene caused by clostridium oedematiens
Peripheral vascular disease	99978	A3A0200	Gas gangrene caused by clostridium perfringens
Peripheral vascular disease	27349	A3A0500	Gas gangrene
Peripheral vascular disease	105581	A3A0B00	Gas gangrene-hand
Peripheral vascular disease	99616	A3A0E00	Gas gangrene-leg
Peripheral vascular disease	72632	A3A0F00	Gas gangrene-foot
Peripheral vascular disease	62061	A930.00	Syphilitic aortic aneurysm
Peripheral vascular disease	31941	A94y600	Rupture of syphilitic cerebral aneurysm
Peripheral vascular disease	49715	F05..00	Phlebitis and thrombophlebitis of intracranial sinuses
Peripheral vascular disease	1266	G401.00	Pulmonary embolism
Peripheral vascular disease	96209	G401100	Recurrent pulmonary embolism
Peripheral vascular disease	22781	G421.00	Aneurysm of pulmonary artery
Peripheral vascular disease	1318	G700.00	Aortic atherosclerosis
Peripheral vascular disease	16284	G701.00	Renal artery atherosclerosis
Peripheral vascular disease	107071	G701011	ARAS - Atherosclerotic renal artery stenosis
Peripheral vascular disease	37199	G70y000	Carotid artery atherosclerosis
Peripheral vascular disease	1735	G71..00	Aortic aneurysm
Peripheral vascular disease	16521	G710.00	Dissecting aortic aneurysm
Peripheral vascular disease	27563	G711.00	Thoracic aortic aneurysm which has ruptured
Peripheral vascular disease	16800	G711.11	Ruptured thoracic aortic aneurysm
Peripheral vascular disease	23532	G712.00	Thoracic aortic aneurysm without mention of rupture
Peripheral vascular disease	17767	G713.00	Abdominal aortic aneurysm which has ruptured
Peripheral vascular disease	63920	G713000	Ruptured suprarenal aortic aneurysm
Peripheral vascular disease	13572	G713.11	Ruptured abdominal aortic aneurysm
Peripheral vascular disease	1867	G714.00	Abdominal aortic aneurysm without mention of rupture
Peripheral vascular disease	45521	G714000	Juxtarenal aortic aneurysm
Peripheral vascular disease	28109	G714100	Inflammatory abdominal aortic aneurysm
Peripheral vascular disease	17345	G714.11	AAA - Abdominal aortic aneurysm without mention of rupture
Peripheral vascular disease	101379	G714200	Infrarenal abdominal aortic aneurysm
Peripheral vascular disease	101195	G714300	Aneurysm of suprarenal aorta
Peripheral vascular disease	15304	G715.00	Ruptured aortic aneurysm NOS
Peripheral vascular disease	11430	G715000	Thoracoabdominal aortic aneurysm; ruptured
Peripheral vascular disease	16034	G716.00	Aortic aneurysm without mention of rupture NOS
Peripheral vascular disease	40787	G716000	Thoracoabdominal aortic aneurysm; without mention of rupture
Peripheral vascular disease	70260	G717.00	Aortic aneurysm - syphilitic
Peripheral vascular disease	9759	G718.00	Leaking abdominal aortic aneurysm
Peripheral vascular disease	6872	G71z.00	Aortic aneurysm NOS
Peripheral vascular disease	9454	G72..00	Other aneurysm
Peripheral vascular disease	59492	G720.00	Aneurysm of artery of arm
Peripheral vascular disease	33613	G720000	Aneurysm of brachial artery
Peripheral vascular disease	25438	G720100	Aneurysm of radial artery
Peripheral vascular disease	30248	G720200	Aneurysm of ulnar artery
Peripheral vascular disease	94408	G720z00	Aneurysm of arm artery NOS
Peripheral vascular disease	18478	G721.00	Aneurysm of renal artery
Peripheral vascular disease	17560	G722.00	Aneurysm of iliac artery
Peripheral vascular disease	16395	G722000	Aneurysm of common iliac artery
Peripheral vascular disease	60879	G722100	Aneurysm of external iliac artery
Peripheral vascular disease	58794	G722200	Aneurysm of internal iliac artery
Peripheral vascular disease	59671	G722z00	Aneurysm of iliac artery NOS
Peripheral vascular disease	45000	G723.00	Aneurysm of leg artery
Peripheral vascular disease	6684	G723000	Aneurysm of femoral artery
Peripheral vascular disease	16366	G723100	Aneurysm of popliteal artery
Peripheral vascular disease	67026	G723200	Aneurysm of anterior tibial artery
Peripheral vascular disease	69847	G723300	Aneurysm of dorsalis pedis artery
Peripheral vascular disease	72062	G723400	Aneurysm of posterior tibial artery
Peripheral vascular disease	31055	G723500	Ruptured popliteal artery aneurysm
Peripheral vascular disease	40524	G723600	Post radiological femoral false aneurysm
Peripheral vascular disease	63059	G723z00	Aneurysm of leg artery NOS
Peripheral vascular disease	28573	G724.00	Arterial false aneurysm
Peripheral vascular disease	18012	G724.11	False aneurysm
Peripheral vascular disease	105760	G72C.00	Ruptured aneurysm of dialysis vascular access
Peripheral vascular disease	107188	G72D.00	Aneurysm of dialysis arteriovenous fistula
Peripheral vascular disease	107220	G72D100	Aneurysm of needle site of dialysis arteriovenous fistula
Peripheral vascular disease	105742	G72D200	Aneurysm of anastomotic site of dialysis AV fistula
Peripheral vascular disease	41171	G72y.00	Aneurysm of other artery
Peripheral vascular disease	31876	G72y000	Aneurysm of common carotid art
Peripheral vascular disease	50678	G72y100	Aneurysm of external carotid artery
Peripheral vascular disease	36390	G72y200	Aneurysm of internal carotid artery
Peripheral vascular disease	58698	G72y300	Aneurysm of neck artery NOS
Peripheral vascular disease	35529	G72y400	Aneurysm of subclavian artery
Peripheral vascular disease	38732	G72y500	Aneurysm of splenic artery
Peripheral vascular disease	52549	G72y600	Aneurysm of axillary artery
Peripheral vascular disease	66823	G72y700	Aneurysm of coeliac artery
Peripheral vascular disease	59538	G72y800	Aneurysm of superior mesenteric artery
Peripheral vascular disease	57135	G72y900	Aneurysm of inferior mesenteric artery
Peripheral vascular disease	27389	G72yA00	Aneurysm of hepatic artery
Peripheral vascular disease	59536	G72yB00	Aneurysm of other visceral artery
Peripheral vascular disease	16068	G72yz00	Other aneurysm NOS
Peripheral vascular disease	3588	G72z.00	Aneurysm NOS
Peripheral vascular disease	5943	G73..00	Other peripheral vascular disease
Peripheral vascular disease	1231	G730.00	Raynaud's syndrome
Peripheral vascular disease	1002	G730000	Raynaud's disease
Peripheral vascular disease	5595	G730100	Raynaud's phenomenon
Peripheral vascular disease	39097	G730z00	Raynaud's syndrome NOS
Peripheral vascular disease	34638	G731.00	Thromboangiitis obliterans
Peripheral vascular disease	23497	G731000	Buerger's disease
Peripheral vascular disease	5702	G73..11	Peripheral ischaemic vascular disease
Peripheral vascular disease	40068	G731100	Presenile gangrene
Peripheral vascular disease	1826	G73..12	Ischaemia of legs
Peripheral vascular disease	67401	G731z00	Thromboangiitis obliterans NOS
Peripheral vascular disease	9204	G732.00	Peripheral gangrene
Peripheral vascular disease	5414	G732000	Gangrene of toe
Peripheral vascular disease	12735	G732100	Gangrene of foot
Peripheral vascular disease	39949	G732200	Gangrene of finger
Peripheral vascular disease	51057	G732300	Gangrene of thumb
Peripheral vascular disease	23672	G732400	Gangrene of hand
Peripheral vascular disease	105317	G734.00	Peripheral arterial disease
Peripheral vascular disease	38907	G73y.00	Other specified peripheral vascular disease
Peripheral vascular disease	4325	G73yz00	Other specified peripheral vascular disease NOS
Peripheral vascular disease	3530	G73z.00	Peripheral vascular disease NOS
Peripheral vascular disease	1517	G73z000	Intermittent claudication
Peripheral vascular disease	6853	G73z011	Claudication
Peripheral vascular disease	101866	G73z012	Vascular claudication
Peripheral vascular disease	2760	G73zz00	Peripheral vascular disease NOS
Peripheral vascular disease	4289	G74..00	Arterial embolism and thrombosis
Peripheral vascular disease	15253	G740.00	Embolism and thrombosis of the abdominal aorta
Peripheral vascular disease	45645	G741.00	Embolism and thrombosis of the thoracic aorta
Peripheral vascular disease	44085	G742.00	Embolism and thrombosis of an arm or leg artery
Peripheral vascular disease	34159	G742000	Embolism and thrombosis of the brachial artery
Peripheral vascular disease	29372	G742100	Embolism and thrombosis of the radial artery
Peripheral vascular disease	62368	G742200	Embolism and thrombosis of the ulnar artery
Peripheral vascular disease	30495	G742300	Embolism and thrombosis of an arm artery NOS
Peripheral vascular disease	2065	G742400	Embolism and thrombosis of the femoral artery
Peripheral vascular disease	4539	G742500	Embolism and thrombosis of the popliteal artery
Peripheral vascular disease	69232	G742600	Embolism and thrombosis of the anterior tibial artery
Peripheral vascular disease	71860	G742700	Embolism and thrombosis of the dorsalis pedis artery
Peripheral vascular disease	99532	G742800	Embolism and thrombosis of the posterior tibial artery
Peripheral vascular disease	44835	G742900	Embolism and thrombosis of a leg artery NOS
Peripheral vascular disease	15302	G742z00	Peripheral arterial embolism and thrombosis NOS
Peripheral vascular disease	28062	G743.00	Embolism and thrombosis of other and unspec parts aorta
Peripheral vascular disease	32235	G74y.00	Embolism and thrombosis of other specified artery
Peripheral vascular disease	54865	G74y000	Embolism and/or thrombosis of the common iliac artery
Peripheral vascular disease	27494	G74y300	Embolism and thrombosis of the iliac artery unspecified
Peripheral vascular disease	6900	G74y500	Embolism and thrombosis of the subclavian artery
Peripheral vascular disease	66981	G74y600	Embolism and thrombosis of the splenic artery
Peripheral vascular disease	31460	G74y700	Embolism and thrombosis of the axillary artery
Peripheral vascular disease	47665	G74y800	Embolism and thrombosis of the coeliac artery
Peripheral vascular disease	49490	G74y900	Embolism and thrombosis of the hepatic artery
Peripheral vascular disease	41597	G74yz00	Embolism and thrombosis of other arteries NOS
Peripheral vascular disease	3714	G74z.00	Arterial embolism and thrombosis NOS
Peripheral vascular disease	18423	G76A.00	Arterial insufficiency
Peripheral vascular disease	5822	G80..00	Phlebitis and thrombophlebitis
Peripheral vascular disease	9737	G800.00	Superficial vessel phlebitis and/or thrombophlebitis of leg
Peripheral vascular disease	22540	G800000	Phlebitis of the long saphenous vein
Peripheral vascular disease	25926	G800100	Phlebitis of the short saphenous vein
Peripheral vascular disease	11472	G800.11	Saphenous vein phlebitis
Peripheral vascular disease	17452	G800.12	Saphenous vein thrombophlebitis
Peripheral vascular disease	20740	G800200	Phlebitis of a superficial leg vein NOS
Peripheral vascular disease	24737	G800300	Thrombophlebitis of the long saphenous vein
Peripheral vascular disease	38527	G800400	Thrombophlebitis of the short saphenous vein
Peripheral vascular disease	11031	G800500	Thrombophlebitis of a superficial leg vein NOS
Peripheral vascular disease	28404	G800z00	Superficial phlebitis and thrombophlebitis of the leg NOS
Peripheral vascular disease	3576	G801.00	Deep vein phlebitis and thrombophlebitis of the leg
Peripheral vascular disease	30743	G801000	Phlebitis of the femoral vein
Peripheral vascular disease	54663	G801100	Phlebitis of the popliteal vein
Peripheral vascular disease	824	G801.11	Deep vein thrombosis
Peripheral vascular disease	25478	G801.12	Deep vein thrombosis; leg
Peripheral vascular disease	3392	G801.13	DVT - Deep vein thrombosis
Peripheral vascular disease	67653	G801200	Phlebitis of the anterior tibial vein
Peripheral vascular disease	41095	G801400	Phlebitis of the posterior tibial vein
Peripheral vascular disease	42158	G801500	Deep vein phlebitis of the leg unspecified
Peripheral vascular disease	15382	G801600	Thrombophlebitis of the femoral vein
Peripheral vascular disease	55661	G801700	Thrombophlebitis of the popliteal vein
Peripheral vascular disease	95077	G801800	Thrombophlebitis of the anterior tibial vein
Peripheral vascular disease	106482	G801900	Thrombophlebitis of the dorsalis pedis vein
Peripheral vascular disease	61760	G801A00	Thrombophlebitis of the posterior tibial vein
Peripheral vascular disease	32002	G801B00	Deep vein thrombophlebitis of the leg unspecified
Peripheral vascular disease	42506	G801C00	Deep vein thrombosis of leg related to air travel
Peripheral vascular disease	22038	G801D00	Deep vein thrombosis of lower limb
Peripheral vascular disease	48920	G801E00	Deep vein thrombosis of leg related to intravenous drug use
Peripheral vascular disease	98526	G801F00	Deep vein thrombosis of peroneal vein
Peripheral vascular disease	104342	G801G00	Recurrent deep vein thrombosis
Peripheral vascular disease	27284	G801z00	Deep vein phlebitis and thrombophlebitis of the leg NOS
Peripheral vascular disease	3466	G802.00	Phlebitis and thrombophlebitis of the leg NOS
Peripheral vascular disease	42435	G80y.00	Other phlebitis and thrombophlebitis
Peripheral vascular disease	106495	G80y000	Phlebitis of the common iliac vein
Peripheral vascular disease	38099	G80y.11	Phlebitis and/or thrombophlebitis of iliac vein
Peripheral vascular disease	71813	G80y200	Phlebitis of the external iliac vein
Peripheral vascular disease	54152	G80y300	Phlebitis of the iliac vein unspecified
Peripheral vascular disease	58166	G80y400	Thrombophlebitis of the common iliac vein
Peripheral vascular disease	94496	G80y500	Thrombophlebitis of the internal iliac vein
Peripheral vascular disease	58023	G80y600	Thrombophlebitis of the external iliac vein
Peripheral vascular disease	91282	G80y700	Thrombophlebitis of the iliac vein unspecified
Peripheral vascular disease	70467	G80y800	Phlebitis and thrombophlebitis of the iliac vein NOS
Peripheral vascular disease	59865	G80y900	Thrombophlebitis of the breast - Mondor's disease
Peripheral vascular disease	14657	G80yz00	Other phlebitis and thrombophlebitis NOS
Peripheral vascular disease	14742	G80z.00	Phlebitis and thrombophlebitis NOS
Peripheral vascular disease	431	G80z000	Phlebitis NOS
Peripheral vascular disease	1264	G80z100	Thrombophlebitis NOS
Peripheral vascular disease	44100	G80zz00	Phlebitis and thrombophlebitis NOS
Peripheral vascular disease	8769	G81..00	Portal vein thrombosis
Peripheral vascular disease	26650	G82..00	Other venous embolism and thrombosis
Peripheral vascular disease	20676	G820.00	Budd - Chiari syndrome (hepatic vein thrombosis)
Peripheral vascular disease	57100	G820.11	Hepatic vein thrombosis
Peripheral vascular disease	16446	G821.00	Thrombophlebitis migrans
Peripheral vascular disease	43555	G822.00	Embolism and thrombosis of the vena cava
Peripheral vascular disease	5503	G823.00	Embolism and thrombosis of the renal vein
Peripheral vascular disease	100103	G824.00	Axillary vein thrombosis
Peripheral vascular disease	35297	G82y.00	Other embolism and thrombosis
Peripheral vascular disease	27688	G82z.00	Embolism and thrombosis NOS
Peripheral vascular disease	23765	G82z111	Penis vein thrombosis
Peripheral vascular disease	2199	G82zz00	Embolism and thrombosis NOS
Peripheral vascular disease	742	G83..00	Varicose veins of the legs
Peripheral vascular disease	1913	G830.00	Varicose veins of the leg with ulcer
Peripheral vascular disease	5983	G831.00	Varicose veins of the leg with eczema
Peripheral vascular disease	16079	G832.00	Varicose veins of the leg with ulcer and eczema
Peripheral vascular disease	18216	G833.00	Varicose veins of the leg with rupture
Peripheral vascular disease	3072	G834.00	Varicose veins of leg without mention of complications
Peripheral vascular disease	85663	G834000	Varicose veins of leg with long saphenous vein distribution
Peripheral vascular disease	89157	G834100	Varicose veins of leg with short saphenous vein distribution
Peripheral vascular disease	17431	G836.00	Varicose vein of leg with phlebitis
Peripheral vascular disease	3214	G83z.00	Varicose veins of the leg NOS
Peripheral vascular disease	29476	G85..00	Other varicose veins
Peripheral vascular disease	25397	G85y.00	Other specified varicose veins
Peripheral vascular disease	32019	G85z.00	Other varicose veins NOS
Peripheral vascular disease	100579	Gyu7000	[X]Atherosclerosis of other arteries
Peripheral vascular disease	102725	Gyu7100	[X]Aortic aneurysm of unspecified site; ruptured
Peripheral vascular disease	102719	Gyu7200	[X]Aortic aneurysm of unspecified site; nonruptured
Peripheral vascular disease	95381	Gyu7300	[X]Aneurysm of other specified arteries
Peripheral vascular disease	73961	Gyu7400	[X]Other specified peripheral vascular diseases
Peripheral vascular disease	105621	Gyu7800	[X]Aneurysm of aorta in diseases classified elsewhere
Peripheral vascular disease	97853	Gyu8000	[X]Phlebitis+thrombophlebitis/oth deep vessls/low extremites
Peripheral vascular disease	52798	Gyu8100	[X]Phlebitis and thombophlebitis of other sites
Peripheral vascular disease	62855	Gyu8200	[X]Embolism and thrombosis of other specified veins
Peripheral vascular disease	93973	Gyu8600	[X]Varicose veins of other specified sites
Peripheral vascular disease	48597	J021000	Pulp gangrene
Peripheral vascular disease	72299	J062000	Aneurysmal cyst of jaw
Peripheral vascular disease	64521	J300.00	Inguinal hernia with gangrene
Peripheral vascular disease	63166	J300000	Unilateral inguinal hernia with gangrene
Peripheral vascular disease	97892	J300300	Bilateral recurrent inguinal hernia with gangrene
Peripheral vascular disease	2230	J300z00	Inguinal hernia with gangrene NOS
Peripheral vascular disease	70641	J310.00	Femoral hernia with gangrene
Peripheral vascular disease	69934	J310000	Unilateral femoral hernia with gangrene
Peripheral vascular disease	99212	J310z00	Femoral hernia with gangrene NOS
Peripheral vascular disease	102024	J320100	Paraumbilical hernia with gangrene
Peripheral vascular disease	105280	J320z00	Umbilical hernia with gangrene NOS
Peripheral vascular disease	93234	J330.00	Ventral hernia with gangrene
Peripheral vascular disease	65147	J330100	Incisional hernia with gangrene
Peripheral vascular disease	71798	J330200	Epigastric hernia with gangrene
Peripheral vascular disease	100575	J330z00	Ventral hernia with gangrene NOS
Peripheral vascular disease	24703	J340.00	Diaphragmatic hernia with gangrene
Peripheral vascular disease	68880	J344.00	Hiatus hernia with gangrene
Peripheral vascular disease	108531	J3C0.00	Spigelian hernia with gangrene
Peripheral vascular disease	65608	J3y0.00	Other specified abdominal cavity hernia with gangrene
Peripheral vascular disease	2987	J3z0.00	Unspecified abdominal cavity hernia with gangrene
Peripheral vascular disease	24720	J420.13	Gangrene - intestine
Peripheral vascular disease	46278	J621.11	Phlebitis of portal vein
Peripheral vascular disease	97851	Jyu3000	[X]Other specified abdominal hernia+obstruction;w'o gangrene
Peripheral vascular disease	53798	Jyu3200	[X]Oth spcfd abdominal hernia without obstructn or gangrene
Peripheral vascular disease	32437	K284600	Fournier's gangrene of scrotum
Peripheral vascular disease	49474	P72z000	Aneurysm of sinus of Valsalva
Peripheral vascular disease	56200	P72z100	Congenital aneurysm of aorta
Peripheral vascular disease	96225	P736.00	Pulmonary arterio-venous aneurysm
Peripheral vascular disease	65029	P737.00	Pulmonary artery aneurysm
Peripheral vascular disease	45384	P76..00	Other peripheral vascular system anomalies
Peripheral vascular disease	18269	P766.00	Peripheral arterio-venous aneurysm
Peripheral vascular disease	61062	P767.00	Congenital peripheral aneurysm
Peripheral vascular disease	40430	P767.11	Cirsoid aneurysm
Peripheral vascular disease	108675	P76y.00	Congenital anomaly of peripheral vascular system OS
Peripheral vascular disease	73738	P76yz00	Other congenital anomaly of peripheral vascular system NOS
Peripheral vascular disease	56429	P76z.00	Peripheral vascular system anomaly NOS
Peripheral vascular disease	63173	P7yz000	Congenital aneurysm NEC
Peripheral vascular disease	4970	R054.00	[D]Gangrene
Peripheral vascular disease	51634	R054000	[D]Gangrene; spreading cutaneous
Peripheral vascular disease	53634	R054200	[D]Gangrene of toe in diabetic
Peripheral vascular disease	31053	R054300	[D]Widespread diabetic foot gangrene
Peripheral vascular disease	37750	R054z00	[D]Gangrene NOS
Peripheral vascular disease	16148	SP12.00	Peripheral vascular complications of care
Peripheral vascular disease	49476	SP12000	Phlebitis as a complication of care
Peripheral vascular disease	44589	SP12100	Thrombophlebitis as a complication of care
Peripheral vascular disease	1224	SP12200	Post operative deep vein thrombosis
Peripheral vascular disease	44528	SP12z00	Peripheral vascular complications of care NOS
Peripheral vascular disease	30194	SP32000	Phlebitis after infusion
Peripheral vascular disease	25161	SP32200	Thrombophlebitis after infusion
Peripheral vascular disease	73179	Z9K4.00	Deep vein thrombosis prevention
Peripheral vascular disease	19562	ZV12800	[V] Personal history deep vein thrombosis
Peripheral vascular disease	17847	ZV12811	[V] Personal history DVT- deep vein thrombosis
Peripheral vascular disease	16976	ZV12900	[V] Personal history of pulmonary embolism
Diabete gestational	2664	L180900	Gestational diabetes mellitus
Diabete gestational	8446	L180811	Gestational diabetes mellitus
Diabete gestational	10278	L180800	Diabetes mellitus arising in pregnancy
Diabete gestational	11359	L180.00	Diabetes mellitus during pregnancy/childbirth/puerperium
Diabete gestational	34639	L180100	Diabetes mellitus during pregnancy - baby delivered
Diabete gestational	49559	L180300	Diabetes mellitus during pregnancy - baby not yet delivered
Diabete gestational	64384	L180z00	Diabetes mellitus in pregnancy/childbirth/puerperium NOS
Diabete gestational	67635	L180000	Diabetes mellitus - unspec whether in pregnancy/puerperium
Diabete gestational	96823	L180400	Diabetes mellitus in pueperium - baby previously delivered
Erectile dysfunction	94343	1ABC.00	Cannot sustain an erection
Erectile dysfunction	94821	1ABC.00	Cannot get an erection
Erectile dysfunction	102274	1D1B.00	C/O erectile dysfunction
Erectile dysfunction	10648	67IA.00	Advice about impotence
Erectile dysfunction	37391	7A6G000	Revascularisation for impotence
Erectile dysfunction	41382	7A6G500	Ligation of penile veins for impotence
Erectile dysfunction	20833	7C25B00	Penile injection to produce erection
Erectile dysfunction	12867	7C25E00	Treatment of erectile dysfunction NEC
Erectile dysfunction	81439	7C25F00	Operations on penis for erectile dysfunction NEC
Erectile dysfunction	710	E227300	Impotence
Erectile dysfunction	3838	E227311	Erectile dysfunction
Erectile dysfunction	12066	Eu52212	[X]Male erectile disorder
Erectile dysfunction	17639	Eu52213	[X]Psychogenic impotence
Erectile dysfunction	17894	K27y100	Impotence of organic origin
Erectile dysfunction	106360	K27y700	Erectile dysfunction due to diabetes mellitus
Erectile dysfunction	92310	Z9E9.00	Provision of device for impotence
Erectile dysfunction	40725	ZG43600	Advice on technique for impotence
Hyperglycemia events	96118	C113z00	Postsurgical hyperglycaemia NOS
Hyperglycemia events	94904	R10D100	[D]Stress induced hyperglycaemia
Hyperglycemia events	65171	R105711	[D]Drug induced hyperglycaemia
Hyperglycemia events	30205	R10C.00	[D]Drug induced hyperglycaemia
Hyperglycemia events	22959	66AJ000	Chronic hyperglycaemia
Hyperglycemia events	11050	44Uz.11	Blood hyperglycaemia NOS
Hyperglycemia events	9310	Ryu8A00	[X]Hyperglycaemia, unspecified
Hyperglycemia events	1789	R105712	[D]Hyperglycaemia
Hyperglycemia events	1173	C321.00	Pure hyperglyceridaemia
Hypoglycemia events	18583	66Ad.00	Hypoglycaemic attack requiring 3rd party assistance
Hypoglycemia events	44440	C108E00	Insulin dependent diabetes mellitus with hypoglycaemic coma
Hypoglycemia events	43785	C109D00	Non-insulin dependent diabetes mellitus with hypoglyca coma
Hypoglycemia events	56268	C109D11	Type II diabetes mellitus with hypoglycaemic coma
Hypoglycemia events	61071	C109D12	Type 2 diabetes mellitus with hypoglycaemic coma
Hypoglycemia events	99716	C10EE12	Insulin dependent diabetes mellitus with hypoglycaemic coma
Hypoglycemia events	46917	C10FD00	Type 2 diabetes mellitus with hypoglycaemic coma
Hypoglycemia events	98723	C10FD11	Type II diabetes mellitus with hypoglycaemic coma
Hypoglycemia events	2472	C110.00	Hypoglycaemic coma
Hypoglycemia events	51371	C110z00	Hypoglycaemic coma NOS
Hypoglycemia events	1410	C112.00	Hypoglycaemia unspecified
Hypoglycemia events	4563	C112000	Reactive hypoglycaemia NOS
Hypoglycemia events	24405	C112100	Spontaneous hypoglycaemia NOS
Hypoglycemia events	20368	C112z00	Hypoglycaemia unspecified NOS
Hypoglycemia events	95920	C116.00	Other hypoglycaemia
Hypoglycemia events	96942	C116000	Post-prandial hypoglycaemia
Hypoglycemia events	32885	C11y100	Drug-induced hypoglycaemia without coma
Hypoglycemia events	52409	Cyu3000	[X]Other hypoglycaemia
Sleep apnea	2506	R005311	[D]Sleep apnoea syndrome
Sleep apnea	7603	Fy03.00	Sleep apnoea
Sleep apnea	8148	Fy03.11	Obstructive sleep apnoea
Sleep apnea	20438	R005312	[D]Syndrome sleep apnoea
Sleep apnea	20748	H5B0.00	Obstructive sleep apnoea
Sleep apnea	23779	H5B..00	Sleep apnoea
Sleep apnea	36301	R005300	[D]Hypersomnia with sleep apnoea
Sleep apnea	48539	R005100	[D]Insomnia with sleep apnoea
Alcohol Dependence	2083	8BA8.00	Alcohol detoxification
Alcohol Dependence	21650	8H35.00	Admitted to alcohol detoxification centre
Alcohol Dependence	11107	C253.00	Wernicke's encephalopathy
Alcohol Dependence	16225	E010.00	Alcohol withdrawal delirium
Alcohol Dependence	1476	E010.12	Delirium tremens
Alcohol Dependence	22277	E010.11	DTs - delirium tremens
Alcohol Dependence	11106	E011100	Korsakov's alcoholic psychosis with peripheral neuritis
Alcohol Dependence	4500	E011000	Korsakov's alcoholic psychosis
Alcohol Dependence	37946	E012000	Chronic alcoholic brain syndrome
Alcohol Dependence	25110	E013.00	Alcohol withdrawal hallucinosis
Alcohol Dependence	2082	E01y000	Alcohol withdrawal syndrome
Alcohol Dependence	24485	E231300	Chronic alcoholism in remission
Alcohol Dependence	40530	E230000	Acute alcoholic intoxication, unspecified, in alcoholism
Alcohol Dependence	33635	E231z00	Chronic alcoholism NOS
Alcohol Dependence	26106	E231200	Episodic chronic alcoholism
Alcohol Dependence	5740	E230.00	Acute alcoholic intoxication in alcoholism
Alcohol Dependence	56947	E230100	Continuous acute alcoholic intoxication in alcoholism
Alcohol Dependence	31443	E231.00	Chronic alcoholism
Alcohol Dependence	57714	E230.11	Alcohol dependence with acute alcoholic intoxication
Alcohol Dependence	21624	E230200	Episodic acute alcoholic intoxication in alcoholism
Alcohol Dependence	43193	E231000	Unspecified chronic alcoholism
Alcohol Dependence	37605	E231.11	Dipsomania
Alcohol Dependence	59574	E230300	Acute alcoholic intoxication in remission, in alcoholism
Alcohol Dependence	2081	E23..11	Alcoholism
Alcohol Dependence	1399	E23..12	Alcohol problem drinking
Alcohol Dependence	36296	E230z00	Acute alcoholic intoxication in alcoholism NOS
Alcohol Dependence	2084	E23..00	Alcohol dependence syndrome
Alcohol Dependence	6169	E23z.00	Alcohol dependence syndrome NOS
Alcohol Dependence	24064	E231100	Continuous chronic alcoholism
Alcohol Dependence	69691	Eu10213	[X]Dipsomania
Alcohol Dependence	5758	Eu10212	[X]Chronic alcoholism
Alcohol Dependence	39327	Eu10200	[X]Mental and behav dis due to use alcohol: dependence syndr
Alcohol Dependence	28780	Eu10211	[X]Alcohol addiction
Alcohol Dependence	20514	Eu10300	[X]Mental and behav dis due to use alcohol: withdrawal state
Alcohol Dependence	64101	Eu10400	[X]Men & behav dis due alcohl: withdrawl state with delirium
Alcohol Dependence	17259	Eu10411	[X]Delirium tremens, alcohol induced
Alcohol Dependence	37691	Eu10712	[X]Chronic alcoholic brain syndrome
Alcohol Dependence	32927	Eu10800	[X]Alcohol withdrawal-induced seizure
Alcohol Dependence	36748	F11x011	Alcoholic encephalopathy
Alcohol Dependence	47555	F11x000	Cerebral degeneration due to alcoholism
Alcohol Dependence	2925	F375.00	Alcoholic polyneuropathy
Alcohol Dependence	31742	F394100	Alcoholic myopathy
Alcohol Dependence	4915	G555.00	Alcoholic cardiomyopathy
Alcohol Dependence	8363	G852300	Oesophageal varices in alcoholic cirrhosis of the liver
Alcohol Dependence	4743	J612.00	Alcoholic cirrhosis of liver
Alcohol Dependence	7943	J617.00	Alcoholic hepatitis
Alcohol Dependence	24984	J671000	Alcohol-induced chronic pancreatitis
Alcohol Dependence	41983	Z191.00	Alcohol detoxification
Diabetes	109760	1M8..00	Diabetic peripheral neuropathic pain
Diabetes	22967	2BBF.00	Retinal abnormality - diabetes related
Diabetes	47328	2BBk.00	O/E - right eye stable treated prolif diabetic retinopathy
Diabetes	9835	2BBL.00	O/E - diabetic maculopathy present both eyes
Diabetes	52041	2BBl.00	O/E - left eye stable treated prolif diabetic retinopathy
Diabetes	52630	2BBo.00	O/E - sight threatening diabetic retinopathy
Diabetes	11433	2BBP.00	O/E - right eye background diabetic retinopathy
Diabetes	11129	2BBQ.00	O/E - left eye background diabetic retinopathy
Diabetes	13099	2BBR.00	O/E - right eye preproliferative diabetic retinopathy
Diabetes	101881	2BBr.00	Impaired vision due to diabetic retinopathy
Diabetes	13103	2BBS.00	O/E - left eye preproliferative diabetic retinopathy
Diabetes	13097	2BBT.00	O/E - right eye proliferative diabetic retinopathy
Diabetes	13101	2BBV.00	O/E - left eye proliferative diabetic retinopathy
Diabetes	13102	2BBW.00	O/E - right eye diabetic maculopathy
Diabetes	13108	2BBX.00	O/E - left eye diabetic maculopathy
Diabetes	27921	2G51000	Foot abnormality - diabetes related
Diabetes	17095	2G5A.00	O/E - Right diabetic foot at risk
Diabetes	26664	2G5B.00	O/E - Left diabetic foot at risk
Diabetes	18056	2G5C.00	Foot abnormality - diabetes related
Diabetes	105740	2G5d.00	O/E - Left diabetic foot at increased risk
Diabetes	26666	2G5E.00	O/E - Right diabetic foot at low risk
Diabetes	105741	2G5e.00	O/E - Right diabetic foot at increased risk
Diabetes	31157	2G5F.00	O/E - Right diabetic foot at moderate risk
Diabetes	31171	2G5G.00	O/E - Right diabetic foot at high risk
Diabetes	35316	2G5H.00	O/E - Right diabetic foot - ulcerated
Diabetes	26667	2G5I.00	O/E - Left diabetic foot at low risk
Diabetes	31156	2G5J.00	O/E - Left diabetic foot at moderate risk
Diabetes	31172	2G5K.00	O/E - Left diabetic foot at high risk
Diabetes	35116	2G5L.00	O/E - Left diabetic foot - ulcerated
Diabetes	62384	2G5V.00	O/E - right chronic diabetic foot ulcer
Diabetes	49640	2G5W.00	O/E - left chronic diabetic foot ulcer
Diabetes	1684	66A4.00	Diabetic on oral treatment
Diabetes	8842	66A5.00	Diabetic on insulin
Diabetes	53238	66AG.00	Diabetic drug side effects
Diabetes	16490	66AH.00	Diabetic treatment changed
Diabetes	107508	66AH200	Conversion to insulin by diabetes specialist nurse
Diabetes	22023	66AJz00	Diabetic - poor control NOS
Diabetes	29041	66AN.00	Date diabetic treatment start
Diabetes	55123	66AO.00	Date diabetic treatment stopp.
Diabetes	101728	66As.00	Diabetic on subcutaneous treatment
Diabetes	102704	66At000	Type I diabetic dietary review
Diabetes	104453	66At011	Type 1 diabetic dietary review
Diabetes	101801	66At100	Type II diabetic dietary review
Diabetes	102611	66At111	Type 2 diabetic dietary review
Diabetes	28769	66AV.00	Diabetic on insulin and oral treatment
Diabetes	110344	66o2.00	Diabetic on non-insulin injectable medication
Diabetes	110379	66o5.00	Diabetic on oral treatment and glucagon-like peptide 1
Diabetes	111483	66o6.00	Diabetic on insulin and glucagon-like peptide 1
Diabetes	108890	679L300	Diabetic foot care education
Diabetes	11471	8B3l.00	Diabetes medication review
Diabetes	12213	8BL2.00	Patient on maximal tolerated therapy for diabetes
Diabetes	11018	8HBG.00	Diabetic retinopathy 12 month review
Diabetes	18662	8HBH.00	Diabetic retinopathy 6 month review
Diabetes	103798	9b92000	Diabetic medicine
Diabetes	711	C10..00	Diabetes mellitus
Diabetes	38986	C100.00	Diabetes mellitus with no mention of complication
Diabetes	24490	C100000	Diabetes mellitus, juvenile type, no mention of complication
Diabetes	1038	C100011	Insulin dependent diabetes mellitus
Diabetes	14803	C100100	Diabetes mellitus, adult onset, no mention of complication
Diabetes	14889	C100111	Maturity onset diabetes
Diabetes	506	C100112	Non-insulin dependent diabetes mellitus
Diabetes	50972	C100z00	Diabetes mellitus NOS with no mention of complication
Diabetes	1682	C101.00	Diabetes mellitus with ketoacidosis
Diabetes	53200	C101000	Diabetes mellitus, juvenile type, with ketoacidosis
Diabetes	54856	C101100	Diabetes mellitus, adult onset, with ketoacidosis
Diabetes	38617	C101y00	Other specified diabetes mellitus with ketoacidosis
Diabetes	42505	C101z00	Diabetes mellitus NOS with ketoacidosis
Diabetes	21482	C102.00	Diabetes mellitus with hyperosmolar coma
Diabetes	40023	C102000	Diabetes mellitus, juvenile type, with hyperosmolar coma
Diabetes	43139	C102100	Diabetes mellitus, adult onset, with hyperosmolar coma
Diabetes	72345	C102z00	Diabetes mellitus NOS with hyperosmolar coma
Diabetes	15690	C103.00	Diabetes mellitus with ketoacidotic coma
Diabetes	42567	C103000	Diabetes mellitus, juvenile type, with ketoacidotic coma
Diabetes	68843	C103100	Diabetes mellitus, adult onset, with ketoacidotic coma
Diabetes	59288	C103y00	Other specified diabetes mellitus with coma
Diabetes	65062	C103z00	Diabetes mellitus NOS with ketoacidotic coma
Diabetes	16502	C104.00	Diabetes mellitus with renal manifestation
Diabetes	2475	C104.11	Diabetic nephropathy
Diabetes	93922	C104000	Diabetes mellitus, juvenile type, with renal manifestation
Diabetes	35105	C104100	Diabetes mellitus, adult onset, with renal manifestation
Diabetes	13279	C104y00	Other specified diabetes mellitus with renal complications
Diabetes	35107	C104z00	Diabetes mellitus with nephropathy NOS
Diabetes	33254	C105.00	Diabetes mellitus with ophthalmic manifestation
Diabetes	69748	C105000	Diabetes mellitus, juvenile type, + ophthalmic manifestation
Diabetes	41389	C105100	Diabetes mellitus, adult onset, + ophthalmic manifestation
Diabetes	47377	C105y00	Other specified diabetes mellitus with ophthalmic complicatn
Diabetes	34283	C105z00	Diabetes mellitus NOS with ophthalmic manifestation
Diabetes	16230	C106.00	Diabetes mellitus with neurological manifestation
Diabetes	59903	C106.11	Diabetic amyotrophy
Diabetes	7795	C106.12	Diabetes mellitus with neuropathy
Diabetes	16491	C106.13	Diabetes mellitus with polyneuropathy
Diabetes	67853	C106000	Diabetes mellitus, juvenile, + neurological manifestation
Diabetes	39317	C106100	Diabetes mellitus, adult onset, + neurological manifestation
Diabetes	61523	C106y00	Other specified diabetes mellitus with neurological comps
Diabetes	22573	C106z00	Diabetes mellitus NOS with neurological manifestation
Diabetes	35399	C107.00	Diabetes mellitus with peripheral circulatory disorder
Diabetes	32403	C107.11	Diabetes mellitus with gangrene
Diabetes	32556	C107.12	Diabetes with gangrene
Diabetes	70448	C107000	Diabetes mellitus, juvenile +peripheral circulatory disorder
Diabetes	63357	C107100	Diabetes mellitus, adult, + peripheral circulatory disorder
Diabetes	33807	C107200	Diabetes mellitus, adult with gangrene
Diabetes	112402	C107y00	Other specified diabetes mellitus with periph circ comps
Diabetes	65025	C107z00	Diabetes mellitus NOS with peripheral circulatory disorder
Diabetes	1647	C108.00	Insulin dependent diabetes mellitus
Diabetes	18505	C108.11	IDDM-Insulin dependent diabetes mellitus
Diabetes	17858	C108.12	Type 1 diabetes mellitus
Diabetes	24423	C108.13	Type I diabetes mellitus
Diabetes	46963	C108000	Insulin-dependent diabetes mellitus with renal complications
Diabetes	61344	C108011	Type I diabetes mellitus with renal complications
Diabetes	21983	C108012	Type 1 diabetes mellitus with renal complications
Diabetes	49276	C108100	Insulin-dependent diabetes mellitus with ophthalmic comps
Diabetes	102740	C108112	Type 1 diabetes mellitus with ophthalmic complications
Diabetes	52283	C108200	Insulin-dependent diabetes mellitus with neurological comps
Diabetes	49146	C108211	Type I diabetes mellitus with neurological complications
Diabetes	61829	C108212	Type 1 diabetes mellitus with neurological complications
Diabetes	52104	C108300	Insulin dependent diabetes mellitus with multiple complicatn
Diabetes	108007	C108311	Type I diabetes mellitus with multiple complications
Diabetes	26855	C108400	Unstable insulin dependent diabetes mellitus
Diabetes	60107	C108411	Unstable type I diabetes mellitus
Diabetes	97474	C108412	Unstable type 1 diabetes mellitus
Diabetes	44443	C108500	Insulin dependent diabetes mellitus with ulcer
Diabetes	51957	C108511	Type I diabetes mellitus with ulcer
Diabetes	68390	C108512	Type 1 diabetes mellitus with ulcer
Diabetes	60499	C108600	Insulin dependent diabetes mellitus with gangrene
Diabetes	6509	C108700	Insulin dependent diabetes mellitus with retinopathy
Diabetes	38161	C108711	Type I diabetes mellitus with retinopathy
Diabetes	41049	C108712	Type 1 diabetes mellitus with retinopathy
Diabetes	6791	C108800	Insulin dependent diabetes mellitus - poor control
Diabetes	46850	C108811	Type I diabetes mellitus - poor control
Diabetes	45914	C108812	Type 1 diabetes mellitus - poor control
Diabetes	31310	C108900	Insulin dependent diabetes maturity onset
Diabetes	63017	C108911	Type I diabetes mellitus maturity onset
Diabetes	97446	C108912	Type 1 diabetes mellitus maturity onset
Diabetes	56448	C108A00	Insulin-dependent diabetes without complication
Diabetes	95992	C108A11	Type I diabetes mellitus without complication
Diabetes	111106	C108A12	Type 1 diabetes mellitus without complication
Diabetes	24694	C108B00	Insulin dependent diabetes mellitus with mononeuropathy
Diabetes	99231	C108B11	Type I diabetes mellitus with mononeuropathy
Diabetes	41716	C108C00	Insulin dependent diabetes mellitus with polyneuropathy
Diabetes	57621	C108D00	Insulin dependent diabetes mellitus with nephropathy
Diabetes	66872	C108D11	Type I diabetes mellitus with nephropathy
Diabetes	44440	C108E00	Insulin dependent diabetes mellitus with hypoglycaemic coma
Diabetes	42729	C108E11	Type I diabetes mellitus with hypoglycaemic coma
Diabetes	70766	C108E12	Type 1 diabetes mellitus with hypoglycaemic coma
Diabetes	44260	C108F00	Insulin dependent diabetes mellitus with diabetic cataract
Diabetes	17545	C108F11	Type I diabetes mellitus with diabetic cataract
Diabetes	110400	C108F12	Type 1 diabetes mellitus with diabetic cataract
Diabetes	65616	C108H00	Insulin dependent diabetes mellitus with arthropathy
Diabetes	62352	C108H11	Type I diabetes mellitus with arthropathy
Diabetes	60208	C108J11	Type I diabetes mellitus with neuropathic arthropathy
Diabetes	18230	C108J12	Type 1 diabetes mellitus with neuropathic arthropathy
Diabetes	46290	C108y00	Other specified diabetes mellitus with multiple comps
Diabetes	64449	C108z00	Unspecified diabetes mellitus with multiple complications
Diabetes	4513	C109.00	Non-insulin dependent diabetes mellitus
Diabetes	5884	C109.11	NIDDM - Non-insulin dependent diabetes mellitus
Diabetes	17859	C109.12	Type 2 diabetes mellitus
Diabetes	18219	C109.13	Type II diabetes mellitus
Diabetes	52303	C109000	Non-insulin-dependent diabetes mellitus with renal comps
Diabetes	50225	C109011	Type II diabetes mellitus with renal complications
Diabetes	18209	C109012	Type 2 diabetes mellitus with renal complications
Diabetes	50429	C109100	Non-insulin-dependent diabetes mellitus with ophthalm comps
Diabetes	59725	C109111	Type II diabetes mellitus with ophthalmic complications
Diabetes	70316	C109112	Type 2 diabetes mellitus with ophthalmic complications
Diabetes	55842	C109200	Non-insulin-dependent diabetes mellitus with neuro comps
Diabetes	67905	C109211	Type II diabetes mellitus with neurological complications
Diabetes	45919	C109212	Type 2 diabetes mellitus with neurological complications
Diabetes	62146	C109300	Non-insulin-dependent diabetes mellitus with multiple comps
Diabetes	108005	C109312	Type 2 diabetes mellitus with multiple complications
Diabetes	34912	C109400	Non-insulin dependent diabetes mellitus with ulcer
Diabetes	55075	C109411	Type II diabetes mellitus with ulcer
Diabetes	65704	C109412	Type 2 diabetes mellitus with ulcer
Diabetes	40401	C109500	Non-insulin dependent diabetes mellitus with gangrene
Diabetes	62107	C109511	Type II diabetes mellitus with gangrene
Diabetes	46150	C109512	Type 2 diabetes mellitus with gangrene
Diabetes	17262	C109600	Non-insulin-dependent diabetes mellitus with retinopathy
Diabetes	58604	C109611	Type II diabetes mellitus with retinopathy
Diabetes	42762	C109612	Type 2 diabetes mellitus with retinopathy
Diabetes	8403	C109700	Non-insulin dependent diabetes mellitus - poor control
Diabetes	24458	C109711	Type II diabetes mellitus - poor control
Diabetes	45913	C109712	Type 2 diabetes mellitus - poor control
Diabetes	29979	C109900	Non-insulin-dependent diabetes mellitus without complication
Diabetes	109103	C109911	Type II diabetes mellitus without complication
Diabetes	105784	C109912	Type 2 diabetes mellitus without complication
Diabetes	72320	C109A00	Non-insulin dependent diabetes mellitus with mononeuropathy
Diabetes	50813	C109A11	Type II diabetes mellitus with mononeuropathy
Diabetes	45467	C109B00	Non-insulin dependent diabetes mellitus with polyneuropathy
Diabetes	47409	C109B11	Type II diabetes mellitus with polyneuropathy
Diabetes	109865	C109B12	Type 2 diabetes mellitus with polyneuropathy
Diabetes	59365	C109C00	Non-insulin dependent diabetes mellitus with nephropathy
Diabetes	64571	C109C11	Type II diabetes mellitus with nephropathy
Diabetes	24836	C109C12	Type 2 diabetes mellitus with nephropathy
Diabetes	43785	C109D00	Non-insulin dependent diabetes mellitus with hypoglyca coma
Diabetes	56268	C109D11	Type II diabetes mellitus with hypoglycaemic coma
Diabetes	61071	C109D12	Type 2 diabetes mellitus with hypoglycaemic coma
Diabetes	69278	C109E00	Non-insulin depend diabetes mellitus with diabetic cataract
Diabetes	48192	C109E11	Type II diabetes mellitus with diabetic cataract
Diabetes	44779	C109E12	Type 2 diabetes mellitus with diabetic cataract
Diabetes	54899	C109F11	Type II diabetes mellitus with peripheral angiopathy
Diabetes	60699	C109F12	Type 2 diabetes mellitus with peripheral angiopathy
Diabetes	24693	C109G00	Non-insulin dependent diabetes mellitus with arthropathy
Diabetes	18143	C109G11	Type II diabetes mellitus with arthropathy
Diabetes	49869	C109G12	Type 2 diabetes mellitus with arthropathy
Diabetes	47816	C109H11	Type II diabetes mellitus with neuropathic arthropathy
Diabetes	66965	C109H12	Type 2 diabetes mellitus with neuropathic arthropathy
Diabetes	18278	C109J00	Insulin treated Type 2 diabetes mellitus
Diabetes	37648	C109J11	Insulin treated non-insulin dependent diabetes mellitus
Diabetes	18264	C109J12	Insulin treated Type II diabetes mellitus
Diabetes	36633	C109K00	Hyperosmolar non-ketotic state in type 2 diabetes mellitus
Diabetes	52236	C10A.00	Malnutrition-related diabetes mellitus
Diabetes	66675	C10A000	Malnutrition-related diabetes mellitus with coma
Diabetes	33969	C10A100	Malnutrition-related diabetes mellitus with ketoacidosis
Diabetes	100347	C10A500	Malnutritn-relat diabetes melitus wth periph circul complctn
Diabetes	11551	C10B.00	Diabetes mellitus induced by steroids
Diabetes	26108	C10B000	Steroid induced diabetes mellitus without complication
Diabetes	43453	C10C.00	Diabetes mellitus autosomal dominant
Diabetes	46624	C10C.11	Maturity onset diabetes in youth
Diabetes	98392	C10C.12	Maturity onset diabetes in youth type 1
Diabetes	36695	C10D.00	Diabetes mellitus autosomal dominant type 2
Diabetes	59991	C10D.11	Maturity onset diabetes in youth type 2
Diabetes	1549	C10E.00	Type 1 diabetes mellitus
Diabetes	12455	C10E.11	Type I diabetes mellitus
Diabetes	51261	C10E.12	Insulin dependent diabetes mellitus
Diabetes	47582	C10E000	Type 1 diabetes mellitus with renal complications
Diabetes	109837	C10E011	Type I diabetes mellitus with renal complications
Diabetes	102946	C10E012	Insulin-dependent diabetes mellitus with renal complications
Diabetes	47649	C10E100	Type 1 diabetes mellitus with ophthalmic complications
Diabetes	99311	C10E111	Type I diabetes mellitus with ophthalmic complications
Diabetes	98071	C10E112	Insulin-dependent diabetes mellitus with ophthalmic comps
Diabetes	42831	C10E200	Type 1 diabetes mellitus with neurological complications
Diabetes	101735	C10E212	Insulin-dependent diabetes mellitus with neurological comps
Diabetes	47650	C10E300	Type 1 diabetes mellitus with multiple complications
Diabetes	91942	C10E311	Type I diabetes mellitus with multiple complications
Diabetes	45276	C10E312	Insulin dependent diabetes mellitus with multiple complicat
Diabetes	43921	C10E400	Unstable type 1 diabetes mellitus
Diabetes	49949	C10E411	Unstable type I diabetes mellitus
Diabetes	54600	C10E412	Unstable insulin dependent diabetes mellitus
Diabetes	18683	C10E500	Type 1 diabetes mellitus with ulcer
Diabetes	93878	C10E511	Type I diabetes mellitus with ulcer
Diabetes	98704	C10E512	Insulin dependent diabetes mellitus with ulcer
Diabetes	69993	C10E600	Type 1 diabetes mellitus with gangrene
Diabetes	102112	C10E611	Type I diabetes mellitus with gangrene
Diabetes	109051	C10E612	Insulin dependent diabetes mellitus with gangrene
Diabetes	18387	C10E700	Type 1 diabetes mellitus with retinopathy
Diabetes	95343	C10E711	Type I diabetes mellitus with retinopathy
Diabetes	93875	C10E712	Insulin dependent diabetes mellitus with retinopathy
Diabetes	35288	C10E800	Type 1 diabetes mellitus - poor control
Diabetes	105337	C10E811	Type I diabetes mellitus - poor control
Diabetes	72702	C10E812	Insulin dependent diabetes mellitus - poor control
Diabetes	40682	C10E900	Type 1 diabetes mellitus maturity onset
Diabetes	96235	C10E911	Type I diabetes mellitus maturity onset
Diabetes	97849	C10E912	Insulin dependent diabetes maturity onset
Diabetes	69676	C10EA00	Type 1 diabetes mellitus without complication
Diabetes	62613	C10EA11	Type I diabetes mellitus without complication
Diabetes	99719	C10EA12	Insulin-dependent diabetes without complication
Diabetes	68105	C10EB00	Type 1 diabetes mellitus with mononeuropathy
Diabetes	46301	C10EC00	Type 1 diabetes mellitus with polyneuropathy
Diabetes	91943	C10EC11	Type I diabetes mellitus with polyneuropathy
Diabetes	101311	C10EC12	Insulin dependent diabetes mellitus with polyneuropathy
Diabetes	10418	C10ED00	Type 1 diabetes mellitus with nephropathy
Diabetes	102163	C10ED12	Insulin dependent diabetes mellitus with nephropathy
Diabetes	39070	C10EE00	Type 1 diabetes mellitus with hypoglycaemic coma
Diabetes	99716	C10EE12	Insulin dependent diabetes mellitus with hypoglycaemic coma
Diabetes	49554	C10EF00	Type 1 diabetes mellitus with diabetic cataract
Diabetes	100770	C10EF12	Insulin dependent diabetes mellitus with diabetic cataract
Diabetes	93468	C10EG00	Type 1 diabetes mellitus with peripheral angiopathy
Diabetes	18642	C10EH00	Type 1 diabetes mellitus with arthropathy
Diabetes	54008	C10EJ00	Type 1 diabetes mellitus with neuropathic arthropathy
Diabetes	30323	C10EK00	Type 1 diabetes mellitus with persistent proteinuria
Diabetes	30294	C10EL00	Type 1 diabetes mellitus with persistent microalbuminuria
Diabetes	102620	C10EL11	Type I diabetes mellitus with persistent microalbuminuria
Diabetes	10692	C10EM00	Type 1 diabetes mellitus with ketoacidosis
Diabetes	62209	C10EM11	Type I diabetes mellitus with ketoacidosis
Diabetes	40837	C10EN00	Type 1 diabetes mellitus with ketoacidotic coma
Diabetes	66145	C10EN11	Type I diabetes mellitus with ketoacidotic coma
Diabetes	22871	C10EP00	Type 1 diabetes mellitus with exudative maculopathy
Diabetes	97894	C10EP11	Type I diabetes mellitus with exudative maculopathy
Diabetes	55239	C10EQ00	Type 1 diabetes mellitus with gastroparesis
Diabetes	108724	C10EQ11	Type I diabetes mellitus with gastroparesis
Diabetes	95636	C10ER00	Latent autoimmune diabetes mellitus in adult
Diabetes	758	C10F.00	Type 2 diabetes mellitus
Diabetes	22884	C10F.11	Type II diabetes mellitus
Diabetes	18777	C10F000	Type 2 diabetes mellitus with renal complications
Diabetes	57278	C10F011	Type II diabetes mellitus with renal complications
Diabetes	47321	C10F100	Type 2 diabetes mellitus with ophthalmic complications
Diabetes	100964	C10F111	Type II diabetes mellitus with ophthalmic complications
Diabetes	34268	C10F200	Type 2 diabetes mellitus with neurological complications
Diabetes	98616	C10F211	Type II diabetes mellitus with neurological complications
Diabetes	65267	C10F300	Type 2 diabetes mellitus with multiple complications
Diabetes	43227	C10F311	Type II diabetes mellitus with multiple complications
Diabetes	49074	C10F400	Type 2 diabetes mellitus with ulcer
Diabetes	91646	C10F411	Type II diabetes mellitus with ulcer
Diabetes	12736	C10F500	Type 2 diabetes mellitus with gangrene
Diabetes	104323	C10F511	Type II diabetes mellitus with gangrene
Diabetes	18496	C10F600	Type 2 diabetes mellitus with retinopathy
Diabetes	49655	C10F611	Type II diabetes mellitus with retinopathy
Diabetes	25627	C10F700	Type 2 diabetes mellitus - poor control
Diabetes	47315	C10F711	Type II diabetes mellitus - poor control
Diabetes	47954	C10F900	Type 2 diabetes mellitus without complication
Diabetes	53392	C10F911	Type II diabetes mellitus without complication
Diabetes	62674	C10FA00	Type 2 diabetes mellitus with mononeuropathy
Diabetes	95351	C10FA11	Type II diabetes mellitus with mononeuropathy
Diabetes	18425	C10FB00	Type 2 diabetes mellitus with polyneuropathy
Diabetes	50527	C10FB11	Type II diabetes mellitus with polyneuropathy
Diabetes	12640	C10FC00	Type 2 diabetes mellitus with nephropathy
Diabetes	102201	C10FC11	Type II diabetes mellitus with nephropathy
Diabetes	46917	C10FD00	Type 2 diabetes mellitus with hypoglycaemic coma
Diabetes	98723	C10FD11	Type II diabetes mellitus with hypoglycaemic coma
Diabetes	44982	C10FE00	Type 2 diabetes mellitus with diabetic cataract
Diabetes	93727	C10FE11	Type II diabetes mellitus with diabetic cataract
Diabetes	37806	C10FF00	Type 2 diabetes mellitus with peripheral angiopathy
Diabetes	104639	C10FF11	Type II diabetes mellitus with peripheral angiopathy
Diabetes	59253	C10FG00	Type 2 diabetes mellitus with arthropathy
Diabetes	103902	C10FG11	Type II diabetes mellitus with arthropathy
Diabetes	35385	C10FH00	Type 2 diabetes mellitus with neuropathic arthropathy
Diabetes	109197	C10FH11	Type II diabetes mellitus with neuropathic arthropathy
Diabetes	1407	C10FJ00	Insulin treated Type 2 diabetes mellitus
Diabetes	64668	C10FJ11	Insulin treated Type II diabetes mellitus
Diabetes	34450	C10FK00	Hyperosmolar non-ketotic state in type 2 diabetes mellitus
Diabetes	107701	C10FK11	Hyperosmolar non-ketotic state in type II diabetes mellitus
Diabetes	26054	C10FL00	Type 2 diabetes mellitus with persistent proteinuria
Diabetes	60796	C10FL11	Type II diabetes mellitus with persistent proteinuria
Diabetes	18390	C10FM00	Type 2 diabetes mellitus with persistent microalbuminuria
Diabetes	85991	C10FM11	Type II diabetes mellitus with persistent microalbuminuria
Diabetes	32627	C10FN00	Type 2 diabetes mellitus with ketoacidosis
Diabetes	106528	C10FN11	Type II diabetes mellitus with ketoacidosis
Diabetes	51756	C10FP00	Type 2 diabetes mellitus with ketoacidotic coma
Diabetes	106061	C10FP11	Type II diabetes mellitus with ketoacidotic coma
Diabetes	25591	C10FQ00	Type 2 diabetes mellitus with exudative maculopathy
Diabetes	111798	C10FQ11	Type II diabetes mellitus with exudative maculopathy
Diabetes	63690	C10FR00	Type 2 diabetes mellitus with gastroparesis
Diabetes	95539	C10FS00	Maternally inherited diabetes mellitus
Diabetes	51697	C10G.00	Secondary pancreatic diabetes mellitus
Diabetes	96506	C10G000	Secondary pancreatic diabetes mellitus without complication
Diabetes	61122	C10H.00	Diabetes mellitus induced by non-steroid drugs
Diabetes	43857	C10M.00	Lipoatrophic diabetes mellitus
Diabetes	22487	C10N.00	Secondary diabetes mellitus
Diabetes	94383	C10N000	Secondary diabetes mellitus without complication
Diabetes	93380	C10N100	Cystic fibrosis related diabetes mellitus
Diabetes	107603	C10P.00	Diabetes mellitus in remission
Diabetes	108360	C10P000	Type I diabetes mellitus in remission
Diabetes	109628	C10P011	Type 1 diabetes mellitus in remission
Diabetes	107824	C10P100	Type II diabetes mellitus in remission
Diabetes	110611	C10P111	Type 2 diabetes mellitus in remission
Diabetes	33343	C10y.00	Diabetes mellitus with other specified manifestation
Diabetes	110997	C10y000	Diabetes mellitus, juvenile, + other specified manifestation
Diabetes	63371	C10y100	Diabetes mellitus, adult, + other specified manifestation
Diabetes	10098	C10yy00	Other specified diabetes mellitus with other spec comps
Diabetes	70821	C10yz00	Diabetes mellitus NOS with other specified manifestation
Diabetes	45491	C10z.00	Diabetes mellitus with unspecified complication
Diabetes	68792	C10z000	Diabetes mellitus, juvenile type, + unspecified complication
Diabetes	63762	C10z100	Diabetes mellitus, adult onset, + unspecified complication
Diabetes	64283	C10zy00	Other specified diabetes mellitus with unspecified comps
Diabetes	64357	C10zz00	Diabetes mellitus NOS with unspecified complication
Diabetes	32193	C11y000	Steroid induced diabetes
Diabetes	52212	Cyu2.00	[X]Diabetes mellitus
Diabetes	41686	Cyu2000	[X]Other specified diabetes mellitus
Diabetes	100292	Cyu2300	[X]Unspecified diabetes mellitus with renal complications
Diabetes	17067	F171100	Autonomic neuropathy due to diabetes
Diabetes	44033	F345000	Diabetic mononeuritis multiplex
Diabetes	17247	F35z000	Diabetic mononeuritis NOS
Diabetes	31790	F372.00	Polyneuropathy in diabetes
Diabetes	5002	F372.11	Diabetic polyneuropathy
Diabetes	2342	F372.12	Diabetic neuropathy
Diabetes	48078	F372000	Acute painful diabetic neuropathy
Diabetes	35785	F372100	Chronic painful diabetic neuropathy
Diabetes	24571	F372200	Asymptomatic diabetic neuropathy
Diabetes	39420	F381300	Myasthenic syndrome due to diabetic amyotrophy
Diabetes	2340	F381311	Diabetic amyotrophy
Diabetes	37315	F3y0.00	Diabetic mononeuropathy
Diabetes	1323	F420.00	Diabetic retinopathy
Diabetes	7069	F420000	Background diabetic retinopathy
Diabetes	3286	F420100	Proliferative diabetic retinopathy
Diabetes	2986	F420200	Preproliferative diabetic retinopathy
Diabetes	10099	F420300	Advanced diabetic maculopathy
Diabetes	3837	F420400	Diabetic maculopathy
Diabetes	47584	F420500	Advanced diabetic retinal disease
Diabetes	10755	F420600	Non proliferative diabetic retinopathy
Diabetes	30477	F420700	High risk proliferative diabetic retinopathy
Diabetes	65463	F420800	High risk non proliferative diabetic retinopathy
Diabetes	11626	F420z00	Diabetic retinopathy NOS
Diabetes	17313	F440700	Diabetic iritis
Diabetes	10659	F464000	Diabetic cataract
Diabetes	34152	G73y000	Diabetic peripheral angiopathy
Diabetes	2471	K01x100	Nephrotic syndrome in diabetes mellitus
Diabetes	30310	K081.00	Nephrogenic diabetes insipidus
Diabetes	110481	K081000	Acquired nephrogenic diabetes insipidus
Diabetes	105302	K08yA00	Proteinuric diabetic nephropathy
Diabetes	107881	K08yA11	Clinical diabetic nephropathy
Diabetes	106360	K27y700	Erectile dysfunction due to diabetes mellitus
Diabetes	99628	Kyu0300	[X]Glomerular disorders in diabetes mellitus
Diabetes	7328	M037200	Cellulitis in diabetic foot
Diabetes	24327	M271000	Ischaemic ulcer diabetic foot
Diabetes	11663	M271100	Neuropathic diabetic ulcer - foot
Diabetes	9881	M271200	Mixed diabetic ulcer - foot
Diabetes	18142	N030000	Diabetic cheiroarthropathy
Diabetes	57333	N030011	Diabetic cheiropathy
Diabetes	27891	N030100	Diabetic Charcot arthropathy
Diabetes	68928	TJ23.00	Adverse reaction to insulins and antidiabetic agents
Diabetes	61210	TJ23z00	Adverse reaction to insulins and antidiabetic agents NOS
Diabetes	65684	U602311	[X] Adverse reaction to insulins and antidiabetic agents
Diabetes	100033	U60231E	[X] Adverse reaction to insulins and antidiabetic agents NOS
Depression	10438	1B1U.11	Depressive symptoms
Depression	10015	1BT..00	Depressed mood
Depression	100977	1JJ..00	Suspected depression
Depression	108741	6658000	Antidepressant drug treatment changed
Depression	102632	6659000	Antidepressant drug treatment started
Depression	46244	E02y300	Drug-induced depressive state
Depression	2560	E11..12	Depressive psychoses
Depression	10610	E112.00	Single major depressive episode
Depression	5879	E112.11	Agitated depression
Depression	6546	E112.12	Endogenous depression first episode
Depression	6950	E112.13	Endogenous depression first episode
Depression	595	E112.14	Endogenous depression
Depression	34390	E112000	Single major depressive episode, unspecified
Depression	16506	E112100	Single major depressive episode, mild
Depression	15155	E112200	Single major depressive episode, moderate
Depression	15219	E112300	Single major depressive episode, severe, without psychosis
Depression	32159	E112400	Single major depressive episode, severe, with psychosis
Depression	43324	E112500	Single major depressive episode, partial or unspec remission
Depression	57409	E112600	Single major depressive episode, in full remission
Depression	7011	E112z00	Single major depressive episode NOS
Depression	15099	E113.00	Recurrent major depressive episode
Depression	6932	E113.11	Endogenous depression - recurrent
Depression	35671	E113000	Recurrent major depressive episodes, unspecified
Depression	29342	E113100	Recurrent major depressive episodes, mild
Depression	14709	E113200	Recurrent major depressive episodes, moderate
Depression	25697	E113300	Recurrent major depressive episodes, severe, no psychosis
Depression	24171	E113400	Recurrent major depressive episodes, severe, with psychosis
Depression	56273	E113500	Recurrent major depressive episodes,partial/unspec remission
Depression	55384	E113600	Recurrent major depressive episodes, in full remission
Depression	6482	E113700	Recurrent depression
Depression	25563	E113z00	Recurrent major depressive episode NOS
Depression	17385	E114.11	Manic-depressive - now manic
Depression	4677	E115.00	Bipolar affective disorder, currently depressed
Depression	12831	E115.11	Manic-depressive - now depressed
Depression	15923	E115000	Bipolar affective disorder, currently depressed, unspecified
Depression	35734	E115100	Bipolar affective disorder, currently depressed, mild
Depression	27890	E115200	Bipolar affective disorder, currently depressed, moderate
Depression	35607	E115300	Bipolar affect disord, now depressed, severe, no psychosis
Depression	63701	E115400	Bipolar affect disord, now depressed, severe with psychosis
Depression	72026	E115500	Bipolar affect disord, now depressed, part/unspec remission
Depression	57465	E115600	Bipolar affective disorder, now depressed, in full remission
Depression	37296	E115z00	Bipolar affective disorder, currently depressed, NOS
Depression	60178	E11y.00	Other and unspecified manic-depressive psychoses
Depression	11596	E11y000	Unspecified manic-depressive psychoses
Depression	27491	E11y200	Atypical depressive disorder
Depression	70399	E11y300	Other mixed manic-depressive psychoses
Depression	33426	E11yz00	Other and unspecified manic-depressive psychoses NOS
Depression	9183	E11z200	Masked depression
Depression	8478	E130.00	Reactive depressive psychosis
Depression	17770	E130.11	Psychotic reactive depression
Depression	1055	E135.00	Agitated depression
Depression	655	E200300	Anxiety with depression
Depression	1131	E204.00	Neurotic depression reactive type
Depression	16632	E291.00	Prolonged depressive reaction
Depression	324	E2B..00	Depressive disorder NEC
Depression	2972	E2B0.00	Postviral depression
Depression	4323	E2B1.00	Chronic depression
Depression	10667	Eu32400	[X]Mild depression
Depression	98346	Eu32500	[X]Major depression, mild
Depression	98252	Eu32600	[X]Major depression, moderately severe
Depression	98414	Eu32700	[X]Major depression, severe without psychotic symptoms
Depression	98417	Eu32800	[X]Major depression, severe with psychotic symptoms
Depression	6854	Eu32y00	[X]Other depressive episodes
Depression	10720	Eu32y11	[X]Atypical depression
Depression	56609	Eu32y12	[X]Single episode of masked depression NOS
Depression	2970	Eu32z00	[X]Depressive episode, unspecified
Depression	543	Eu32z11	[X]Depression NOS
Depression	3291	Eu32z12	[X]Depressive disorder NOS
Depression	28248	Eu32z13	[X]Prolonged single episode of reactive depression
Depression	5987	Eu32z14	[X] Reactive depression NOS
Depression	3292	Eu33.00	[X]Recurrent depressive disorder
Depression	8851	Eu33.11	[X]Recurrent episodes of depressive reaction
Depression	19696	Eu33.12	[X]Recurrent episodes of psychogenic depression
Depression	8902	Eu33.13	[X]Recurrent episodes of reactive depression
Depression	28756	Eu33.14	[X]Seasonal depressive disorder
Depression	29784	Eu33000	[X]Recurrent depressive disorder, current episode mild
Depression	29520	Eu33100	[X]Recurrent depressive disorder, current episode moderate
Depression	33469	Eu33200	[X]Recurr depress disorder cur epi severe without psyc sympt
Depression	11329	Eu33211	[X]Endogenous depression without psychotic symptoms
Depression	11252	Eu33212	[X]Major depression, recurrent without psychotic symptoms
Depression	29451	Eu33213	[X]Manic-depress psychosis,depressd,no psychotic symptoms
Depression	73991	Eu33214	[X]Vital depression, recurrent without psychotic symptoms
Depression	47009	Eu33300	[X]Recurrent depress disorder cur epi severe with psyc symp
Depression	23731	Eu33311	[X]Endogenous depression with psychotic symptoms
Depression	28677	Eu33312	[X]Manic-depress psychosis,depressed type+psychotic symptoms
Depression	32941	Eu33313	[X]Recurr severe episodes/major depression+psychotic symptom
Depression	31757	Eu33314	[X]Recurr severe episodes/psychogenic depressive psychosis
Depression	16861	Eu33315	[X]Recurrent severe episodes of psychotic depression
Depression	37764	Eu33316	[X]Recurrent severe episodes/reactive depressive psychosis
Depression	22116	Eu33400	[X]Recurrent depressive disorder, currently in remission
Depression	47731	Eu33y00	[X]Other recurrent depressive disorders
Depression	44300	Eu33z00	[X]Recurrent depressive disorder, unspecified
Depression	36616	Eu33z11	[X]Monopolar depression NOS
Depression	8584	Eu34111	[X]Depressive neurosis
Depression	10290	Eu34112	[X]Depressive personality disorder
Depression	7737	Eu34113	[X]Neurotic depression
Depression	15220	Eu34114	[X]Persistant anxiety depression
Depression	19054	Eu3y111	[X]Recurrent brief depressive episodes
Depression	11913	Eu41200	[X]Mixed anxiety and depressive disorder
Depression	7749	Eu41211	[X]Mild anxiety depression
Depression	13307	Eu53011	[X]Postnatal depression NOS
Depression	4979	Eu53012	[X]Postpartum depression NOS
Depression	32845	Eu92000	[X]Depressive conduct disorder
Depression	46796	U609211	[X] Adverse reaction to antidepressant
Depression	55631	U609213	[X] Adverse reaction to antidepressants NOS
Depression	9796	1B1U.00	Symptoms of depression
Depression	1996	1B17.00	Depressed
Depression	4824	1B17.11	C/O - feeling depressed
Depression	2639	E204.11	Postnatal depression
Depression	10455	E211200	Depressive personality disorder
Depression	7569	TJ90.00	Adverse reaction to antidepressants
Depression	39808	TJ90z00	Adverse reaction to antidepressants NOS
Depression	11717	Eu32000	[X]Mild depressive episode
Depression	9211	Eu32100	[X]Moderate depressive episode

## Sheet: Product codes
Product class	Product code	Gemscript code	Product name	Drug substance name
Antidepressant Drugs	57978	47285020	Trimipramine 25mg tablets (Waymade Healthcare Plc)	Trimipramine maleate
Antidepressant Drugs	41681	49845020	Imipramine 10mg tablets (A A H Pharmaceuticals Ltd)	Imipramine hydrochloride
Antidepressant Drugs	1809	59430020	Imipramine 25mg tablets	Imipramine hydrochloride
Antidepressant Drugs	34355	49842020	Imipramine 25mg tablets (Actavis UK Ltd)	Imipramine hydrochloride
Antidepressant Drugs	34872	49838020	Imipramine 25mg Tablet (C P Pharmaceuticals Ltd)	Imipramine hydrochloride
Antidepressant Drugs	1310	59429020	Imipramine 10mg tablets	Imipramine hydrochloride
Antidepressant Drugs	4404	55404020	Tofranil 25mg/5ml syrup (Novartis Pharmaceuticals UK Ltd)	Imipramine hydrochloride
Antidepressant Drugs	2532	55417020	Surmontil 25mg tablets (Sanofi)	Trimipramine maleate
Antidepressant Drugs	33074	59528020	Praminil 10mg Tablet (DDSA Pharmaceuticals Ltd)	Imipramine hydrochloride
Antidepressant Drugs	66493	34984020	Trimipramine 25mg/5ml oral suspension	Trimipramine maleate
Antidepressant Drugs	8928	55416020	Surmontil 10mg tablets (Sanofi)	Trimipramine maleate
Antidepressant Drugs	8055	63537020	Imipramine 25mg/5ml oral solution	Imipramine hydrochloride
Antidepressant Drugs	42228	71733020	Trimipramine 10mg tablets (A A H Pharmaceuticals Ltd)	Trimipramine maleate
Antidepressant Drugs	3196	67282020	Trimipramine 50mg capsules	Trimipramine maleate
Antidepressant Drugs	66919	47283020	Trimipramine 50mg capsules (Waymade Healthcare Plc)	Trimipramine maleate
Antidepressant Drugs	2579	55402020	Tofranil 10mg Tablet (Novartis Pharmaceuticals UK Ltd)	Imipramine hydrochloride
Antidepressant Drugs	4310	67280020	Trimipramine 10mg tablets	Trimipramine maleate
Antidepressant Drugs	32863	68803020	Imipramine 10mg tablets (Teva UK Ltd)	Imipramine hydrochloride
Antidepressant Drugs	56501	3734020	Tofranil 25mg tablets (Lexon (UK) Ltd)	Imipramine hydrochloride
Antidepressant Drugs	65213	34986020	Trimipramine 50mg/5ml oral solution	Trimipramine maleate
Antidepressant Drugs	7910	55403020	Tofranil 25mg tablets (Novartis Pharmaceuticals UK Ltd)	Imipramine hydrochloride
Antidepressant Drugs	65445	71739020	Trimipramine 50mg capsules (A A H Pharmaceuticals Ltd)	Trimipramine maleate
Antidepressant Drugs	67935	75460020	Imipramine 10mg tablets (Almus Pharmaceuticals Ltd)	Imipramine hydrochloride
Antidepressant Drugs	34222	49841020	Imipramine 10mg tablets (Actavis UK Ltd)	Imipramine hydrochloride
Antidepressant Drugs	42247	97872020	Imipramine 25mg/5ml oral solution sugar free	Imipramine hydrochloride
Antidepressant Drugs	53808	3784020	Trimipramine 10mg tablets (Phoenix Healthcare Distribution Ltd)	Trimipramine maleate
Antidepressant Drugs	41408	55369020	Imipramine 25mg tablets (Teva UK Ltd)	Imipramine hydrochloride
Antidepressant Drugs	71253	21765021	Imipramine 10mg tablets (DE Pharmaceuticals)	Imipramine hydrochloride
Antidepressant Drugs	34813	49846020	Imipramine 25mg tablets (A A H Pharmaceuticals Ltd)	Imipramine hydrochloride
Antidepressant Drugs	45226	71736020	Trimipramine 25mg tablets (A A H Pharmaceuticals Ltd)	Trimipramine maleate
Antidepressant Drugs	2039	67281020	Trimipramine 25mg tablets	Trimipramine maleate
Antidepressant Drugs	2531	55418020	Surmontil 50mg capsules (Sanofi)	Trimipramine maleate
Antidepressant Drugs	70287	52720021	Imipramine 10mg tablets (Sigma Pharmaceuticals Plc)	Imipramine hydrochloride
Antidepressant Drugs	73419	65757020	Trazodone 150mg tablets (A A H Pharmaceuticals Ltd)	Trazodone hydrochloride
Antidepressant Drugs	64458	19449020	Clomipramine 25mg/5ml oral suspension	Clomipramine hydrochloride
Antidepressant Drugs	35493	92459020	Sinepin 50mg capsules (Marlborough Pharmaceuticals Ltd)	Doxepin hydrochloride
Antidepressant Drugs	21820	57110020	Prepadine 25mg capsules (Teva UK Ltd)	Dosulepin hydrochloride
Antidepressant Drugs	12309	65411020	Viloxazine hcl 50mg tablets	Viloxazine Hydrochloride
Antidepressant Drugs	55139	3675020	Amitriptyline 25mg tablets (Alliance Healthcare (Distribution) Ltd)	Amitriptyline hydrochloride
Antidepressant Drugs	3842	62850020	Doxepin 10mg capsules	Doxepin hydrochloride
Antidepressant Drugs	2525	60224020	Amitriptyline 75mg modified-release capsules	Amitriptyline Hydrochloride
Antidepressant Drugs	24723	71173020	Asendis 150mg Tablet (Wyeth Pharmaceuticals)	Amoxapine
Antidepressant Drugs	55970	3751020	Nortriptyline 10mg tablets (King Pharmaceuticals Ltd)	Nortriptyline hydrochloride
Antidepressant Drugs	35258	92457020	Sinepin 25mg capsules (Marlborough Pharmaceuticals Ltd)	Doxepin hydrochloride
Antidepressant Drugs	40396	48491020	Amitriptyline 50mg Tablet (Berk Pharmaceuticals Ltd)	Amitriptyline hydrochloride
Antidepressant Drugs	52867	3674020	Amitriptyline 10mg tablets (Accord Healthcare Ltd)	Amitriptyline hydrochloride
Antidepressant Drugs	61835	16423021	Amitriptyline 10mg tablets (DE Pharmaceuticals)	Amitriptyline hydrochloride
Antidepressant Drugs	56703	60806020	Lofepramine 70mg tablets (Sandoz Ltd)	Lofepramine hydrochloride
Antidepressant Drugs	65987	48019021	Amitriptyline 25mg tablets (Crescent Pharma Ltd)	Amitriptyline hydrochloride
Antidepressant Drugs	19779	60229020	Amitriptyline 10mg/ml injection	Amitriptyline Hydrochloride
Antidepressant Drugs	62681	66768020	Dosulepin 75mg tablets (Sandoz Ltd)	Dosulepin hydrochloride
Antidepressant Drugs	73639	77033020	Trazodone 100mg capsules (Actavis UK Ltd)	Trazodone hydrochloride
Antidepressant Drugs	46801	503021	Amitriptyline 10mg/5ml oral solution	Amitriptyline hydrochloride
Antidepressant Drugs	8831	55446020	Tryptizol mr 75mg Modified-release capsule (Merck Sharp & Dohme Ltd)	Amitriptyline Hydrochloride
Antidepressant Drugs	26213	55362020	Domical 10mg Tablet (Berk Pharmaceuticals Ltd)	Amitriptyline hydrochloride
Antidepressant Drugs	34578	56517020	Lofepramine 70mg tablets (IVAX Pharmaceuticals UK Ltd)	Lofepramine hydrochloride
Antidepressant Drugs	33624	48481020	Amitriptyline 50mg tablets (Teva UK Ltd)	Amitriptyline hydrochloride
Antidepressant Drugs	34470	62276020	Trazodone 150mg tablets (Zentiva)	Trazodone hydrochloride
Antidepressant Drugs	32439	48534020	Amitriptyline 25mg Tablet (Sussex Pharmaceutical Ltd)	Amitriptyline hydrochloride
Antidepressant Drugs	66579	53398021	Amitriptyline 25mg tablets (Mawdsley-Brooks & Company Ltd)	Amitriptyline hydrochloride
Antidepressant Drugs	66749	34730020	Trazodone 10mg/5ml oral solution	Trazodone hydrochloride
Antidepressant Drugs	31672	63629020	Prondol 30mg Tablet (Wyeth Pharmaceuticals)	Iprindole
Antidepressant Drugs	41609	62361020	Trazodone 50mg capsules (Teva UK Ltd)	Trazodone hydrochloride
Antidepressant Drugs	7059	62857020	Doxepin 75mg capsules	Doxepin hydrochloride
Antidepressant Drugs	57107	3673020	Amitriptyline 10mg tablets (Phoenix Healthcare Distribution Ltd)	Amitriptyline hydrochloride
Antidepressant Drugs	41628	57824020	Clomipramine 10mg capsules (IVAX Pharmaceuticals UK Ltd)	Clomipramine hydrochloride
Antidepressant Drugs	45350	54670020	Clomipramine 25mg capsules (Teva UK Ltd)	Clomipramine hydrochloride
Antidepressant Drugs	60355	3678020	Amitriptyline 25mg tablets (Phoenix Healthcare Distribution Ltd)	Amitriptyline hydrochloride
Antidepressant Drugs	39145	65159020	Nortriptyline 10mg/5ml Liquid	Nortriptyline Hydrochloride
Antidepressant Drugs	12129	55465020	Sinequan 25mg capsules (Pfizer Ltd)	Doxepin hydrochloride
Antidepressant Drugs	66100	23705021	Lofepramine 70mg tablets (DE Pharmaceuticals)	Lofepramine hydrochloride
Antidepressant Drugs	70991	41373020	Amitriptyline 10mg tablets (Arrow Generics Ltd)	Amitriptyline hydrochloride
Antidepressant Drugs	21819	57111020	Prepadine 75mg tablets (Teva UK Ltd)	Dosulepin hydrochloride
Antidepressant Drugs	64330	70951020	Amitriptyline 50mg tablets (Almus Pharmaceuticals Ltd)	Amitriptyline hydrochloride
Antidepressant Drugs	42734	68383020	Dosulepin 75mg tablets (Almus Pharmaceuticals Ltd)	Dosulepin hydrochloride
Antidepressant Drugs	29875	60464020	Dosulepin 25mg capsules (Mylan)	Dosulepin hydrochloride
Antidepressant Drugs	67990	3715020	Prothiaden 25mg capsules (Sigma Pharmaceuticals Plc)	Dosulepin hydrochloride
Antidepressant Drugs	34046	59084020	Lofepramine 70mg tablets (A A H Pharmaceuticals Ltd)	Lofepramine hydrochloride
Antidepressant Drugs	50722	19725020	Dosulepin 25mg/5ml oral solution	Dosulepin hydrochloride
Antidepressant Drugs	31824	53818020	Dosulepin 25mg capsules (IVAX Pharmaceuticals UK Ltd)	Dosulepin hydrochloride
Antidepressant Drugs	29339	62911020	Trazodone 50mg capsules (Mylan)	Trazodone hydrochloride
Antidepressant Drugs	19168	54728020	Dosulepin 25mg/5ml mixture	Dosulepin Hydrochloride
Antidepressant Drugs	62620	60329020	Clomipramine 10mg capsules (Mylan)	Clomipramine hydrochloride
Antidepressant Drugs	4690	75329020	Amitriptyline 50mg/5ml oral solution sugar free	Amitriptyline hydrochloride
Antidepressant Drugs	41563	57825020	Clomipramine 25mg capsules (IVAX Pharmaceuticals UK Ltd)	Clomipramine hydrochloride
Antidepressant Drugs	20571	62045020	Fluphenazine with nortriptyline 500microgramswith10mg Tablet	Fluphenazine Hydrochloride/Nortriptyline Hydrochloride
Antidepressant Drugs	27733	63625020	Iprindole hc 30mg	Iprindole
Antidepressant Drugs	3183	65153020	Nortriptyline 10mg tablets	Nortriptyline hydrochloride
Antidepressant Drugs	68228	35908020	Nortriptyline 10mg/5ml oral suspension	Nortriptyline hydrochloride
Antidepressant Drugs	45737	55642020	Dosulepin 25mg/5ml Oral solution (Rosemont Pharmaceuticals Ltd)	Dosulepin Hydrochloride
Antidepressant Drugs	34058	54620020	Dosulepin 75mg tablets (Teva UK Ltd)	Dosulepin hydrochloride
Antidepressant Drugs	8878	55450020	Tryptizol 10mg/5ml sugar free Oral solution (Merck Sharp and Dohme Ltd)	Amitriptyline Hydrochloride
Antidepressant Drugs	3670	61464020	Clomipramine 25mg capsules	Clomipramine hydrochloride
Antidepressant Drugs	34003	61096020	Trazodone 50mg capsules (A A H Pharmaceuticals Ltd)	Trazodone hydrochloride
Antidepressant Drugs	1888	58951020	Amitriptyline 50mg tablets	Amitriptyline hydrochloride
Antidepressant Drugs	1453	52047020	Triptafen m 2mg+10mg Tablet (Goldshield Pharmaceuticals Ltd)	Amitriptyline hydrochloride/Perphenazine
Antidepressant Drugs	14398	71169020	Asendis 50mg Tablet (Wyeth Pharmaceuticals)	Amoxapine
Antidepressant Drugs	64647	16424021	Amitriptyline 25mg tablets (DE Pharmaceuticals)	Amitriptyline hydrochloride
Antidepressant Drugs	4411	71189020	Amoxapine 150mg tablets	Amoxapine
Antidepressant Drugs	24141	48507020	Amitriptyline 10mg tablets (Actavis UK Ltd)	Amitriptyline hydrochloride
Antidepressant Drugs	24134	48517020	Amitriptyline 25mg tablets (Kent Pharmaceuticals Ltd)	Amitriptyline hydrochloride
Antidepressant Drugs	70521	52899021	Trazodone 50mg/5ml oral solution sugar free (AMCo)	Trazodone hydrochloride
Antidepressant Drugs	24147	48480020	Amitriptyline 25mg tablets (Teva UK Ltd)	Amitriptyline hydrochloride
Antidepressant Drugs	3554	62851020	Doxepin 25mg capsules	Doxepin hydrochloride
Antidepressant Drugs	53161	19451020	Clomipramine 50mg/5ml oral solution	Clomipramine hydrochloride
Antidepressant Drugs	5073	62852020	Doxepin 50mg capsules	Doxepin hydrochloride
Antidepressant Drugs	34503	48523020	Amitriptyline 25mg tablets (IVAX Pharmaceuticals UK Ltd)	Amitriptyline hydrochloride
Antidepressant Drugs	4020	67153020	Trazodone 150mg tablets	Trazodone hydrochloride
Antidepressant Drugs	2093	55432020	Gamanil 70mg tablets (Merck Serono Ltd)	Lofepramine hydrochloride
Antidepressant Drugs	3652	71187020	Amoxapine 100mg tablets	Amoxapine
Antidepressant Drugs	34580	61097020	Trazodone 100mg capsules (A A H Pharmaceuticals Ltd)	Trazodone hydrochloride
Antidepressant Drugs	24152	48479020	Amitriptyline 10mg tablets (Teva UK Ltd)	Amitriptyline hydrochloride
Antidepressant Drugs	67742	60522020	Lofepramine 70mg tablets (Mylan)	Lofepramine hydrochloride
Antidepressant Drugs	3194	61463020	Clomipramine 10mg capsules	Clomipramine hydrochloride
Antidepressant Drugs	20026	55363020	Domical 25mg Tablet (Berk Pharmaceuticals Ltd)	Amitriptyline hydrochloride
Antidepressant Drugs	27476	63624020	Iprindole hc 15mg	Iprindole
Antidepressant Drugs	7981	62277020	Desipramine 25mg tablets	Desipramine
Antidepressant Drugs	182	55445020	Tryptizol 10mg/ml Injection (Merck Sharp & Dohme Ltd)	Amitriptyline Hydrochloride
Antidepressant Drugs	84	62833020	Dosulepin 25mg capsules	Dosulepin hydrochloride
Antidepressant Drugs	34245	50947020	Clomipramine 25mg capsules (A A H Pharmaceuticals Ltd)	Clomipramine hydrochloride
Antidepressant Drugs	27008	55364020	Domical 50mg Tablet (Berk Pharmaceuticals Ltd)	Amitriptyline hydrochloride
Antidepressant Drugs	65879	52215021	Amitriptyline 10mg tablets (Sigma Pharmaceuticals Plc)	Amitriptyline hydrochloride
Antidepressant Drugs	4218	64035020	Lofepramine 70mg/5ml oral suspension sugar free	Lofepramine hydrochloride
Antidepressant Drugs	25444	84171020	Lomont 70mg/5ml oral suspension (Rosemont Pharmaceuticals Ltd)	Lofepramine hydrochloride
Antidepressant Drugs	8726	55440020	Tryptizol 10mg Tablet (Merck Sharp & Dohme Ltd)	Amitriptyline hydrochloride
Antidepressant Drugs	8174	54779020	Molipaxin 50mg/5ml oral liquid (Sanofi)	Trazodone hydrochloride
Antidepressant Drugs	60929	9999020	Protriptyline 5mg tablets	Protriptyline hydrochloride
Antidepressant Drugs	3083	64729020	Mianserin 10mg tablets	Mianserin hydrochloride
Antidepressant Drugs	21357	71170020	Asendis 100mg Tablet (Wyeth Pharmaceuticals)	Amoxapine
Antidepressant Drugs	1169	55456020	Prothiaden 25mg capsules (Teofarma)	Dosulepin hydrochloride
Antidepressant Drugs	58450	78927020	Feprapax 70mg tablets (Ashbourne Pharmaceuticals Ltd)	Lofepramine hydrochloride
Antidepressant Drugs	73363	19789020	Doxepin 50mg/5ml oral solution	Doxepin hydrochloride
Antidepressant Drugs	7979	55380020	Pertofran 25mg Tablet (Novartis Pharmaceuticals UK Ltd)	Desipramine
Antidepressant Drugs	14519	55469020	Sinequan 75mg capsules (Pfizer Ltd)	Doxepin hydrochloride
Antidepressant Drugs	7468	48430020	Bolvidon 10mg Tablet (Organon Laboratories Ltd)	Mianserin hydrochloride
Antidepressant Drugs	12125	55466020	Sinequan 50mg capsules (Pfizer Ltd)	Doxepin hydrochloride
Antidepressant Drugs	6255	64731020	Mianserin 30mg tablets	Mianserin hydrochloride
Antidepressant Drugs	72291	79684021	Trazodone 100mg/5ml oral solution sugar free	Trazodone hydrochloride
Antidepressant Drugs	48065	92481020	Amitriptyline oral solution	Amitriptyline Hydrochloride
Antidepressant Drugs	4003	54110020	Molipaxin 150mg tablets (Zentiva)	Trazodone hydrochloride
Antidepressant Drugs	6312	75330020	Amitriptyline 25mg/5ml oral solution sugar free	Amitriptyline hydrochloride
Antidepressant Drugs	34197	48492020	Amitriptyline 25mg Tablet (Berk Pharmaceuticals Ltd)	Amitriptyline hydrochloride
Antidepressant Drugs	71042	41374020	Amitriptyline 25mg tablets (Arrow Generics Ltd)	Amitriptyline hydrochloride
Antidepressant Drugs	7894	55396020	Anafranil SR 75mg tablets (Novartis Pharmaceuticals UK Ltd)	Clomipramine hydrochloride
Antidepressant Drugs	66201	3754020	Nortriptyline 25mg tablets (Sigma Pharmaceuticals Plc)	Nortriptyline hydrochloride
Antidepressant Drugs	34421	62274020	Trazodone 50mg capsules (Zentiva)	Trazodone hydrochloride
Antidepressant Drugs	59161	47269020	Amitriptyline 10mg tablets (Waymade Healthcare Plc)	Amitriptyline hydrochloride
Antidepressant Drugs	11187	66328020	Protriptyline 10mg tablet	Protriptyline Hydrochloride
Antidepressant Drugs	34223	54621020	Dosulepin 25mg capsules (Teva UK Ltd)	Dosulepin hydrochloride
Antidepressant Drugs	64141	18973020	Amitriptyline 5mg/5ml oral solution	Amitriptyline hydrochloride
Antidepressant Drugs	7515	55386020	Anafranil 10mg capsules (Novartis Pharmaceuticals UK Ltd)	Clomipramine hydrochloride
Antidepressant Drugs	21081	68724020	Amitriptyline 12.5mg / Chlordiazepoxide 5mg capsules	Amitriptyline Hydrochloride/Chlordiazepoxide
Antidepressant Drugs	60410	77894020	Amitriptyline 25mg/5ml oral solution sugar free (Wockhardt UK Ltd)	Amitriptyline hydrochloride
Antidepressant Drugs	46818	505021	Amitriptyline 10mg/5ml oral suspension	Amitriptyline hydrochloride
Antidepressant Drugs	30983	62913020	Trazodone 150mg tablets (Mylan)	Trazodone hydrochloride
Antidepressant Drugs	48216	77778020	Nortriptyline 25mg tablets (A A H Pharmaceuticals Ltd)	Nortriptyline hydrochloride
Antidepressant Drugs	71023	29402020	Dosulepin 25mg/5ml oral solution sugar free (Special Order)	Dosulepin hydrochloride
Antidepressant Drugs	11963	54655020	Limbitrol 10 Capsule (Roche Products Ltd)	Amitriptyline Hydrochloride/Chlordiazepoxide
Antidepressant Drugs	70593	19723020	Dosulepin 25mg/5ml oral suspension	Dosulepin hydrochloride
Antidepressant Drugs	43024	97461020	Dosulepin 100mg/5ml oral solution	Dosulepin hydrochloride
Antidepressant Drugs	65804	54671020	Clomipramine 50mg capsules (Teva UK Ltd)	Clomipramine hydrochloride
Antidepressant Drugs	69317	75075021	Nortriptyline 50mg tablets	Nortriptyline hydrochloride
Antidepressant Drugs	4194	54109020	Molipaxin 100mg capsules (Zentiva)	Trazodone hydrochloride
Antidepressant Drugs	34474	48528020	Amitriptyline 25mg Tablet (Regent Laboratories Ltd)	Amitriptyline hydrochloride
Antidepressant Drugs	67127	16426021	Amitriptyline 25mg/5ml oral solution sugar free (DE Pharmaceuticals)	Amitriptyline hydrochloride
Antidepressant Drugs	21157	84817020	Thaden 75mg tablets (Opus Pharmaceuticals Ltd)	Dosulepin hydrochloride
Antidepressant Drugs	66572	3677020	Amitriptyline 25mg tablets (Sigma Pharmaceuticals Plc)	Amitriptyline hydrochloride
Antidepressant Drugs	12227	68785020	Butriptyline 25mg tablets	Butriptyline Hydrochloride
Antidepressant Drugs	65237	77775020	Nortriptyline 10mg tablets (A A H Pharmaceuticals Ltd)	Nortriptyline hydrochloride
Antidepressant Drugs	42078	70948020	Amitriptyline 25mg tablets (Almus Pharmaceuticals Ltd)	Amitriptyline hydrochloride
Antidepressant Drugs	59820	77899020	Amitriptyline 50mg/5ml oral solution sugar free (Wockhardt UK Ltd)	Amitriptyline hydrochloride
Antidepressant Drugs	72626	35906020	Nortriptyline 10mg/5ml oral solution	Nortriptyline hydrochloride
Antidepressant Drugs	33164	66765020	Dosulepin 25mg capsules (Sandoz Ltd)	Dosulepin hydrochloride
Antidepressant Drugs	19181	62912020	Trazodone 100mg capsules (Mylan)	Trazodone hydrochloride
Antidepressant Drugs	73636	77035020	Trazodone 150mg tablets (Actavis UK Ltd)	Trazodone hydrochloride
Antidepressant Drugs	3903	65154020	Nortriptyline 25mg tablets	Nortriptyline hydrochloride
Antidepressant Drugs	8719	55392020	Anafranil 25mg/5ml syrup (Novartis Pharmaceuticals UK Ltd)	Clomipramine hydrochloride
Antidepressant Drugs	61657	34750020	Trazodone 75mg/5ml oral solution	Trazodone hydrochloride
Antidepressant Drugs	7816	57965020	Concordin 5 Tablet (Merck Sharp & Dohme Ltd)	Protriptyline Hydrochloride
Antidepressant Drugs	34634	48509020	Amitriptyline 50mg tablets (Actavis UK Ltd)	Amitriptyline hydrochloride
Antidepressant Drugs	51758	3717020	Prothiaden 25mg capsules (Stephar (U.K.) Ltd)	Dosulepin hydrochloride
Antidepressant Drugs	74	62834020	Dosulepin 75mg tablets	Dosulepin hydrochloride
Antidepressant Drugs	10948	54727020	Dosulepin 75mg/5ml oral solution sugar free	Dosulepin Hydrochloride
Antidepressant Drugs	83	58949020	Amitriptyline 10mg tablets	Amitriptyline hydrochloride
Antidepressant Drugs	2320	55457020	Prothiaden 75mg tablets (Teofarma)	Dosulepin hydrochloride
Antidepressant Drugs	41709	62362020	Trazodone 100mg capsules (Teva UK Ltd)	Trazodone hydrochloride
Antidepressant Drugs	3777	75331020	Amitriptyline 10mg/5ml sugar free oral solution	Amitriptyline Hydrochloride
Antidepressant Drugs	32457	68786020	Butriptyline 50mg tablets	Butriptyline Hydrochloride
Antidepressant Drugs	23426	49588020	Dosulepin 25mg capsules (A A H Pharmaceuticals Ltd)	Dosulepin hydrochloride
Antidepressant Drugs	8332	55442020	Tryptizol 50mg Tablet (Merck Sharp & Dohme Ltd)	Amitriptyline hydrochloride
Antidepressant Drugs	34643	68380020	Dosulepin 25mg capsules (Almus Pharmaceuticals Ltd)	Dosulepin hydrochloride
Antidepressant Drugs	12368	50774020	Norval 10mg Tablet (Bencard)	Mianserin hydrochloride
Antidepressant Drugs	46970	48524020	Amitriptyline 50mg tablets (IVAX Pharmaceuticals UK Ltd)	Amitriptyline hydrochloride
Antidepressant Drugs	7693	55388020	Anafranil 50mg capsules (Novartis Pharmaceuticals UK Ltd)	Clomipramine hydrochloride
Antidepressant Drugs	34401	48484020	Amitriptyline 10mg tablets (Wockhardt UK Ltd)	Amitriptyline hydrochloride
Antidepressant Drugs	8661	61473020	Clomipramine 75mg modified-release tablets	Clomipramine hydrochloride
Antidepressant Drugs	69355	95215020	Trazodone Oral solution	Trazodone Hydrochloride
Antidepressant Drugs	3925	61465020	Clomipramine 50mg capsules	Clomipramine hydrochloride
Antidepressant Drugs	47363	50103020	Mianserin 20mg Tablet (Berk Pharmaceuticals Ltd)	Mianserin hydrochloride
Antidepressant Drugs	24680	59132020	Elavil 10mg Tablet (DDSA Pharmaceuticals Ltd)	Amitriptyline hydrochloride
Antidepressant Drugs	8640	55356020	Allegron 25mg tablets (King Pharmaceuticals Ltd)	Nortriptyline hydrochloride
Antidepressant Drugs	22070	55688020	Amitriptyline 10mg/5ml Oral solution (Rosemont Pharmaceuticals Ltd)	Amitriptyline Hydrochloride
Antidepressant Drugs	8720	61469020	Clomipramine 25mg/5ml oral solution	Clomipramine hydrochloride
Antidepressant Drugs	64000	52055021	Amitriptyline 10mg/5ml oral solution sugar free	Amitriptyline hydrochloride
Antidepressant Drugs	32121	49589020	Dosulepin 75mg tablets (A A H Pharmaceuticals Ltd)	Dosulepin hydrochloride
Antidepressant Drugs	57972	3671020	Amitriptyline 10mg tablets (Alliance Healthcare (Distribution) Ltd)	Amitriptyline hydrochloride
Antidepressant Drugs	34274	48498020	Amitriptyline 50mg tablets (A A H Pharmaceuticals Ltd)	Amitriptyline hydrochloride
Antidepressant Drugs	34182	48518020	Amitriptyline 50mg tablets (Kent Pharmaceuticals Ltd)	Amitriptyline hydrochloride
Antidepressant Drugs	65762	47275020	Clomipramine 25mg capsules (Waymade Healthcare Plc)	Clomipramine hydrochloride
Antidepressant Drugs	65439	68492020	Amitriptyline 25mg tablets (Sandoz Ltd)	Amitriptyline hydrochloride
Antidepressant Drugs	34866	50946020	Clomipramine 10mg capsules (A A H Pharmaceuticals Ltd)	Clomipramine hydrochloride
Antidepressant Drugs	61842	34746020	Trazodone 50mg/5ml oral solution	Trazodone hydrochloride
Antidepressant Drugs	41597	57826020	Clomipramine 50mg capsules (IVAX Pharmaceuticals UK Ltd)	Clomipramine hydrochloride
Antidepressant Drugs	34950	57022020	Lofepramine 70mg tablets (Accord Healthcare Ltd)	Lofepramine hydrochloride
Antidepressant Drugs	34731	48516020	Amitriptyline 10mg tablets (Kent Pharmaceuticals Ltd)	Amitriptyline hydrochloride
Antidepressant Drugs	3355	67151020	Trazodone 50mg capsules	Trazodone hydrochloride
Antidepressant Drugs	12192	50776020	Norval 30mg Tablet (Bencard)	Mianserin hydrochloride
Antidepressant Drugs	19186	56943020	Dosulepin 75mg tablets (Actavis UK Ltd)	Dosulepin hydrochloride
Antidepressant Drugs	34224	55686020	Amitriptyline 25mg/5ml oral solution sugar free (Rosemont Pharmaceuticals Ltd)	Amitriptyline hydrochloride
Antidepressant Drugs	68665	3694020	Clomipramine 10mg capsules (Almus Pharmaceuticals Ltd)	Clomipramine hydrochloride
Antidepressant Drugs	8144	48431020	Bolvidon 20mg Tablet (Organon Laboratories Ltd)	Mianserin hydrochloride
Antidepressant Drugs	24700	63628020	Prondol 15mg Tablet (Wyeth Pharmaceuticals)	Iprindole
Antidepressant Drugs	34672	60055020	Lofepramine 70mg tablets (Sterwin Medicines)	Lofepramine hydrochloride
Antidepressant Drugs	6442	67156020	Trazodone 50mg/5ml oral solution sugar free	Trazodone hydrochloride
Antidepressant Drugs	33090	48496020	Amitriptyline 10mg tablets (A A H Pharmaceuticals Ltd)	Amitriptyline hydrochloride
Antidepressant Drugs	63276	3761020	Nortriptyline 25mg tablets (Alliance Healthcare (Distribution) Ltd)	Nortriptyline hydrochloride
Antidepressant Drugs	4118	65157020	Nortriptyline 10mg Capsule	Nortriptyline Hydrochloride
Antidepressant Drugs	15632	56699020	Dothapax 75 tablets (Ashbourne Pharmaceuticals Ltd)	Dosulepin hydrochloride
Antidepressant Drugs	24145	48508020	Amitriptyline 25mg tablets (Actavis UK Ltd)	Amitriptyline hydrochloride
Antidepressant Drugs	34129	48485020	Amitriptyline 25mg tablets (Wockhardt UK Ltd)	Amitriptyline hydrochloride
Antidepressant Drugs	12353	55348020	Aventyl 25mg Capsule (Eli Lilly and Company Ltd)	Nortriptyline Hydrochloride
Antidepressant Drugs	17183	55347020	Aventyl 10mg Capsule (Eli Lilly and Company Ltd)	Nortriptyline Hydrochloride
Antidepressant Drugs	53187	3701020	Clomipramine 50mg capsules (Kent Pharmaceuticals Ltd)	Clomipramine hydrochloride
Antidepressant Drugs	55138	34738020	Trazodone 250mg/5ml oral solution	Trazodone hydrochloride
Antidepressant Drugs	18932	55424020	Evadyne 25mg Tablet (Wyeth Pharmaceuticals)	Butriptyline Hydrochloride
Antidepressant Drugs	6894	65593020	Perphenazine 2mg with Amitriptyline 25mg tablet	Amitriptyline Hydrochloride/Perphenazine
Antidepressant Drugs	8585	48432020	Bolvidon 30mg Tablet (Organon Laboratories Ltd)	Mianserin hydrochloride
Antidepressant Drugs	57226	34744020	Trazodone 25mg/5ml oral suspension	Trazodone hydrochloride
Antidepressant Drugs	7756	66327020	Protriptyline 5mg tablet	Protriptyline Hydrochloride
Antidepressant Drugs	7678	65158020	Nortriptyline 25mg Capsule	Nortriptyline Hydrochloride
Antidepressant Drugs	55137	34736020	Trazodone 150mg/5ml oral suspension	Trazodone hydrochloride
Antidepressant Drugs	6054	62835020	Dosulepin 25mg/5ml oral solution sugar free	Dosulepin Hydrochloride
Antidepressant Drugs	18342	68725020	Amitriptyline 25mg / Chlordiazepoxide 10mg capsules	Amitriptyline Hydrochloride/Chlordiazepoxide
Antidepressant Drugs	70300	60086021	Amitriptyline 10mg/5ml oral solution sugar free (Alliance Healthcare (Distribution) Ltd)	Amitriptyline hydrochloride
Antidepressant Drugs	7677	55355020	Allegron 10mg tablets (King Pharmaceuticals Ltd)	Nortriptyline hydrochloride
Antidepressant Drugs	34641	62179020	Dosulepin 25mg capsules (Sovereign Medical Ltd)	Dosulepin hydrochloride
Antidepressant Drugs	14534	50198020	Limbitrol 5 Capsule (Roche Products Ltd)	Amitriptyline Hydrochloride/Chlordiazepoxide
Antidepressant Drugs	4874	54108020	Molipaxin 50mg capsules (Zentiva)	Trazodone hydrochloride
Antidepressant Drugs	12549	55349020	Aventyl 10mg/5ml Liquid (Eli Lilly and Company Ltd)	Nortriptyline Hydrochloride
Antidepressant Drugs	34916	48490020	Amitriptyline 10mg Tablet (Berk Pharmaceuticals Ltd)	Amitriptyline hydrochloride
Antidepressant Drugs	34745	56942020	Dosulepin 25mg capsules (Actavis UK Ltd)	Dosulepin hydrochloride
Antidepressant Drugs	11956	50775020	Norval 20mg Tablet (Bencard)	Mianserin hydrochloride
Antidepressant Drugs	70838	52970020	Dosulepin 25mg Capsule (Celltech Pharma Europe Ltd)	Dosulepin hydrochloride
Antidepressant Drugs	29857	62363020	Trazodone 150mg tablets (Teva UK Ltd)	Trazodone hydrochloride
Antidepressant Drugs	41729	48502020	Amitriptyline 25mg Tablet (Celltech Pharma Europe Ltd)	Amitriptyline hydrochloride
Antidepressant Drugs	1730	67152020	Trazodone 100mg capsules	Trazodone hydrochloride
Antidepressant Drugs	67728	3720020	Dosulepin 75mg tablets (Alliance Healthcare (Distribution) Ltd)	Dosulepin hydrochloride
Antidepressant Drugs	16323	65592020	Perphenazine 2mg with Amitriptyline 10mg tablet	Amitriptyline Hydrochloride/Perphenazine
Antidepressant Drugs	49	58950020	Amitriptyline 25mg tablets	Amitriptyline hydrochloride
Antidepressant Drugs	30376	84816020	Thaden 25mg capsules (Opus Pharmaceuticals Ltd)	Dosulepin hydrochloride
Antidepressant Drugs	43561	54669020	Clomipramine 10mg capsules (Teva UK Ltd)	Clomipramine hydrochloride
Antidepressant Drugs	45242	48533020	Amitriptyline 10mg Tablet (Sussex Pharmaceutical Ltd)	Amitriptyline hydrochloride
Antidepressant Drugs	31826	53817020	Dosulepin 75mg tablets (IVAX Pharmaceuticals UK Ltd)	Dosulepin hydrochloride
Antidepressant Drugs	59931	78020020	Trazodone 50mg/5ml oral solution sugar free (A A H Pharmaceuticals Ltd)	Trazodone hydrochloride
Antidepressant Drugs	68657	63397020	Lofepramine 70mg tablets (Kent Pharmaceuticals Ltd)	Lofepramine hydrochloride
Antidepressant Drugs	45233	48522020	Amitriptyline 10mg tablets (IVAX Pharmaceuticals UK Ltd)	Amitriptyline hydrochloride
Antidepressant Drugs	45318	50948020	Clomipramine 50mg capsules (A A H Pharmaceuticals Ltd)	Clomipramine hydrochloride
Antidepressant Drugs	54877	3679020	Amitriptyline 25mg tablets (Accord Healthcare Ltd)	Amitriptyline hydrochloride
Antidepressant Drugs	71031	77031020	Trazodone 50mg capsules (Actavis UK Ltd)	Trazodone hydrochloride
Antidepressant Drugs	12111	52298020	Vivalan 50mg Tablet (AstraZeneca UK Ltd)	Viloxazine Hydrochloride
Antidepressant Drugs	55491	70945020	Amitriptyline 10mg tablets (Almus Pharmaceuticals Ltd)	Amitriptyline hydrochloride
Antidepressant Drugs	69712	52216021	Amitriptyline 50mg tablets (Sigma Pharmaceuticals Plc)	Amitriptyline hydrochloride
Antidepressant Drugs	57926	19721020	Dosulepin 75mg/5ml oral solution	Dosulepin hydrochloride
Antidepressant Drugs	595	68729020	Amitriptyline 25mg / Perphenazine 2mg tablets	Amitriptyline hydrochloride/Perphenazine
Antidepressant Drugs	17319	71185020	Amoxapine 25mg tablets	Amoxapine
Antidepressant Drugs	10413	55464020	Sinequan 10mg capsules (Pfizer Ltd)	Doxepin hydrochloride
Antidepressant Drugs	44853	63443020	Dosulepin 25mg capsules (Kent Pharmaceuticals Ltd)	Dosulepin hydrochloride
Antidepressant Drugs	7751	55441020	Tryptizol 25mg Tablet (Merck Sharp & Dohme Ltd)	Amitriptyline hydrochloride
Antidepressant Drugs	42394	48513020	Amitriptyline 25mg Tablet (Crosspharma Ltd)	Amitriptyline hydrochloride
Antidepressant Drugs	15380	71168020	Asendis 25mg Tablet (Wyeth Pharmaceuticals)	Amoxapine
Antidepressant Drugs	56229	32936020	Lofepramine 70mg/5ml oral solution	Lofepramine hydrochloride
Antidepressant Drugs	34525	60465020	Dosulepin 75mg tablets (Mylan)	Dosulepin hydrochloride
Antidepressant Drugs	114	64034020	Lofepramine 70mg tablets	Lofepramine hydrochloride
Antidepressant Drugs	71059	76389020	Dosulepin 75mg tablets (Sovereign Medical Ltd)	Dosulepin hydrochloride
Antidepressant Drugs	34107	48486020	Amitriptyline 50mg tablets (Wockhardt UK Ltd)	Amitriptyline hydrochloride
Antidepressant Drugs	38274	95021020	Clomipramine 50mg/5ml oral suspension	Clomipramine hydrochloride
Antidepressant Drugs	43534	55646020	Lofepramine 70mg/5ml Oral suspension (Rosemont Pharmaceuticals Ltd)	Lofepramine hydrochloride
Antidepressant Drugs	60591	75291020	Lofepramine 70mg tablets (Teva UK Ltd)	Lofepramine hydrochloride
Antidepressant Drugs	7755	57970020	Concordin 10 Tablet (Merck Sharp & Dohme Ltd)	Protriptyline Hydrochloride
Antidepressant Drugs	34782	48497020	Amitriptyline 25mg tablets (A A H Pharmaceuticals Ltd)	Amitriptyline hydrochloride
Antidepressant Drugs	1940	56698020	Dothapax 25 capsules (Ashbourne Pharmaceuticals Ltd)	Dosulepin hydrochloride
Antidepressant Drugs	65152	34726020	Trazodone 100mg/5ml oral solution	Trazodone hydrochloride
Antidepressant Drugs	40777	96353020	Doxepin 25mg/5ml oral suspension	Doxepin Hydrochloride
Antidepressant Drugs	41710	62275020	Trazodone 100mg capsules (Zentiva)	Trazodone hydrochloride
Antidepressant Drugs	66578	53397021	Amitriptyline 10mg tablets (Mawdsley-Brooks & Company Ltd)	Amitriptyline hydrochloride
Antidepressant Drugs	34251	55687020	Amitriptyline 50mg/5ml oral solution sugar free (Rosemont Pharmaceuticals Ltd)	Amitriptyline hydrochloride
Antidepressant Drugs	3657	55387020	Anafranil 25mg capsules (Novartis Pharmaceuticals UK Ltd)	Clomipramine hydrochloride
Antidepressant Drugs	1208	52046020	Triptafen tablets (AMCo)	Amitriptyline hydrochloride/Perphenazine
Antidepressant Drugs	41627	59282020	Lofepramine 70mg Tablet (Teva UK Ltd)	Lofepramine hydrochloride
Antidepressant Drugs	30375	61477020	Anafranil 25mg/2ml solution for injection ampoules (Novartis Pharmaceuticals UK Ltd)	Clomipramine hydrochloride
Antidepressant Drugs	26513	61470020	Clomipramine 25mg/2ml solution for injection ampoules	Clomipramine hydrochloride
Antidepressant Drugs	71067	78529020	Lofepramine 70mg tablets (Almus Pharmaceuticals Ltd)	Lofepramine hydrochloride
Antidepressant Drugs	64785	3913020	Paroxetine 30mg tablets (Alliance Healthcare (Distribution) Ltd)	Paroxetine hydrochloride
Antidepressant Drugs	35021	92043020	Paroxetine 10mg tablets	Paroxetine hydrochloride
Antidepressant Drugs	34351	63703020	Paroxetine 20mg tablets (IVAX Pharmaceuticals UK Ltd)	Paroxetine hydrochloride
Antidepressant Drugs	55537	3921020	Seroxat 30mg tablets (Lexon (UK) Ltd)	Paroxetine hydrochloride
Antidepressant Drugs	73668	75183020	Paroxetine 20mg tablets (Almus Pharmaceuticals Ltd)	Paroxetine hydrochloride
Antidepressant Drugs	55023	45165020	Paroxetine 20mg tablets (Medreich Plc)	Paroxetine hydrochloride
Antidepressant Drugs	68325	70413021	Paroxetine 40mg tablets	Paroxetine hydrochloride
Antidepressant Drugs	40892	69754020	Paroxetine 20mg tablets (Genus Pharmaceuticals Ltd)	Paroxetine hydrochloride
Antidepressant Drugs	841	72937020	Seroxat 20mg tablets (GlaxoSmithKline UK Ltd)	Paroxetine hydrochloride
Antidepressant Drugs	32899	65578020	Paroxetine 20mg tablets (Actavis UK Ltd)	Paroxetine hydrochloride
Antidepressant Drugs	73589	3907020	Seroxat 20mg tablets (Lexon (UK) Ltd)	Paroxetine hydrochloride
Antidepressant Drugs	34419	66464020	Paroxetine 20mg tablets (A A H Pharmaceuticals Ltd)	Paroxetine hydrochloride
Antidepressant Drugs	59288	45504020	Paroxetine 10mg tablets (Actavis UK Ltd)	Paroxetine hydrochloride
Antidepressant Drugs	35112	93187020	Seroxat 10mg tablets (GlaxoSmithKline UK Ltd)	Paroxetine hydrochloride
Antidepressant Drugs	67259	33458020	Paroxetine 10mg/5ml oral solution	Paroxetine hydrochloride
Antidepressant Drugs	33978	66399020	Paroxetine 20mg tablets (Mylan)	Paroxetine hydrochloride
Antidepressant Drugs	1397	72933020	Paroxetine 30mg tablets	Paroxetine hydrochloride
Antidepressant Drugs	527	72934020	Paroxetine 10mg/5ml oral suspension sugar free	Paroxetine hydrochloride
Antidepressant Drugs	34587	67650020	Paroxetine 30mg tablets (A A H Pharmaceuticals Ltd)	Paroxetine hydrochloride
Antidepressant Drugs	3601	72939020	Seroxat 20mg/10ml liquid (GlaxoSmithKline UK Ltd)	Paroxetine hydrochloride
Antidepressant Drugs	66292	40759021	Seroxat 10mg tablets (Waymade Healthcare Plc)	Paroxetine hydrochloride
Antidepressant Drugs	50	72932020	Paroxetine 20mg tablets	Paroxetine hydrochloride
Antidepressant Drugs	40165	67575020	Paroxetine 30mg tablets (Actavis UK Ltd)	Paroxetine hydrochloride
Antidepressant Drugs	1575	72938020	Seroxat 30mg tablets (GlaxoSmithKline UK Ltd)	Paroxetine hydrochloride
Antidepressant Drugs	67097	4001020	Citalopram 20mg tablets (Accord Healthcare Ltd)	Citalopram hydrobromide
Antidepressant Drugs	2290	62070020	Fluvoxamine 100mg tablets	Fluvoxamine maleate
Antidepressant Drugs	52824	71214020	Citalopram 10mg tablets (PLIVA Pharma Ltd)	Citalopram hydrobromide
Antidepressant Drugs	67562	69555021	Fluoxetine 40mg capsules	Fluoxetine hydrochloride
Antidepressant Drugs	30258	64692020	Fluoxetine 20mg/5ml oral solution (Teva UK Ltd)	Fluoxetine hydrochloride
Antidepressant Drugs	34288	61409020	Fluoxetine 20mg capsules (Mylan)	Fluoxetine hydrochloride
Antidepressant Drugs	67888	3856020	Fluoxetine 60mg capsules (Kent Pharmaceuticals Ltd)	Fluoxetine hydrochloride
Antidepressant Drugs	3391	79505020	Dutonin 100mg tablets (Bristol-Myers Squibb Pharmaceuticals Ltd)	Nefazodone hydrochloride
Antidepressant Drugs	46926	66160020	Citalopram 40mg tablets (Zentiva)	Citalopram hydrobromide
Antidepressant Drugs	34499	65125020	Citalopram 10mg tablets (Sandoz Ltd)	Citalopram hydrobromide
Antidepressant Drugs	26056	90873020	Cipralex 10mg/ml oral drops (Lundbeck Ltd)	Escitalopram oxalate
Antidepressant Drugs	67431	69067021	Fluoxetine 10mg capsules	Fluoxetine hydrochloride
Antidepressant Drugs	34413	66149020	Citalopram 10mg tablets (Zentiva)	Citalopram hydrobromide
Antidepressant Drugs	67928	3898020	Sertraline 100mg tablets (Milpharm Ltd)	Sertraline hydrochloride
Antidepressant Drugs	34966	68045020	Citalopram 20mg tablets (Teva UK Ltd)	Citalopram hydrobromide
Antidepressant Drugs	62950	39812020	Sertraline 100mg tablets (Accord Healthcare Ltd)	Sertraline hydrochloride
Antidepressant Drugs	60839	71379020	Citalopram 40mg tablets (Almus Pharmaceuticals Ltd)	Citalopram hydrobromide
Antidepressant Drugs	69898	72021020	Sertraline 50mg tablets (Sandoz Ltd)	Sertraline hydrochloride
Antidepressant Drugs	63953	3994020	Cipramil 20mg tablets (DE Pharmaceuticals)	Citalopram hydrobromide
Antidepressant Drugs	60962	3830020	Fluoxetine 20mg capsules (Alliance Healthcare (Distribution) Ltd)	Fluoxetine hydrochloride
Antidepressant Drugs	815	77312020	Cipramil 40mg/ml drops (Lundbeck Ltd)	Citalopram hydrochloride
Antidepressant Drugs	6405	87524020	Escitalopram 5mg tablets	Escitalopram oxalate
Antidepressant Drugs	4297	79506020	Dutonin 200mg tablets (Bristol-Myers Squibb Pharmaceuticals Ltd)	Nefazodone hydrochloride
Antidepressant Drugs	34856	65464020	Fluoxetine 60mg capsules (Mylan)	Fluoxetine hydrochloride
Antidepressant Drugs	68266	78054020	Fluoxetine 20mg/5ml oral solution sugar free (Actavis UK Ltd)	Fluoxetine hydrochloride
Antidepressant Drugs	727	74051020	Sertraline 100mg tablets	Sertraline hydrochloride
Antidepressant Drugs	69542	3840020	Prozac 20mg capsules (Necessity Supplies Ltd)	Fluoxetine hydrochloride
Antidepressant Drugs	34456	61319020	Fluoxetine 20mg capsules (Teva UK Ltd)	Fluoxetine hydrochloride
Antidepressant Drugs	73414	78033020	Fluoxetine 20mg/5ml oral solution (Pinewood Healthcare)	Fluoxetine hydrochloride
Antidepressant Drugs	67758	3835020	Prozac 20mg capsules (DE Pharmaceuticals)	Fluoxetine hydrochloride
Antidepressant Drugs	54081	33816020	Sertraline 25mg/5ml oral suspension	Sertraline hydrochloride
Antidepressant Drugs	67	79462020	Citalopram 20mg tablets	Citalopram hydrobromide
Antidepressant Drugs	12123	62074020	Faverin 100mg tablets (Mylan)	Fluvoxamine maleate
Antidepressant Drugs	65771	52635021	Sertraline 200mg/5ml oral suspension (Special Order)	Sertraline
Antidepressant Drugs	2408	79422020	Cipramil 40mg tablets (Lundbeck Ltd)	Citalopram hydrobromide
Antidepressant Drugs	34586	65376020	Citalopram 10mg tablets (A A H Pharmaceuticals Ltd)	Citalopram hydrobromide
Antidepressant Drugs	60534	24094021	Fluoxetine 20mg dispersible tablets sugar free	Fluoxetine hydrochloride
Antidepressant Drugs	49519	20738020	Sertraline 100mg/5ml oral suspension	Sertraline hydrochloride
Antidepressant Drugs	43519	65262020	Citalopram 40mg Tablet (Neo Laboratories Ltd)	Citalopram hydrobromide
Antidepressant Drugs	785	87526020	Cipralex 5mg tablets (Lundbeck Ltd)	Escitalopram oxalate
Antidepressant Drugs	67769	3841020	Fluoxetine 20mg capsules (Strides Shasun (UK) Ltd)	Fluoxetine hydrochloride
Antidepressant Drugs	59193	69079020	Citalopram 10mg tablets (Ranbaxy (UK) Ltd)	Citalopram hydrobromide
Antidepressant Drugs	34294	61167020	Fluoxetine 20mg capsules (IVAX Pharmaceuticals UK Ltd)	Fluoxetine hydrochloride
Antidepressant Drugs	34603	66459020	Citalopram 40mg tablets (Mylan)	Citalopram hydrobromide
Antidepressant Drugs	32848	67890020	Citalopram 10mg tablets (Actavis UK Ltd)	Citalopram hydrobromide
Antidepressant Drugs	38890	74425020	Fluoxetine 20mg Capsule (Milpharm Ltd)	Fluoxetine hydrochloride
Antidepressant Drugs	62155	3839020	Fluoxetine 20mg capsules (Phoenix Healthcare Distribution Ltd)	Fluoxetine hydrochloride
Antidepressant Drugs	45304	68049020	Citalopram 40mg tablets (Teva UK Ltd)	Citalopram hydrobromide
Antidepressant Drugs	34202	61455020	Fluoxetine 20mg capsules (Genus Pharmaceuticals Ltd)	Fluoxetine hydrochloride
Antidepressant Drugs	20152	90871020	Escitalopram 10mg/ml oral drops sugar free	Escitalopram oxalate
Antidepressant Drugs	37256	93918020	Prozep 20mg/5ml oral solution (Chemidex Pharma Ltd)	Fluoxetine hydrochloride
Antidepressant Drugs	57936	76354020	Citalopram 40mg/ml oral drops sugar free (A A H Pharmaceuticals Ltd)	Citalopram hydrochloride
Antidepressant Drugs	418	69506020	Prozac 20mg capsules (Eli Lilly and Company Ltd)	Fluoxetine hydrochloride
Antidepressant Drugs	69685	23555021	Fluoxetine 20mg/5ml oral solution sugar free (Morningside Healthcare Ltd)	Fluoxetine hydrochloride
Antidepressant Drugs	66413	3885020	Sertraline 100mg tablets (Ranbaxy (UK) Ltd)	Sertraline hydrochloride
Antidepressant Drugs	54826	33812020	Sertraline 150mg/5ml oral suspension	Sertraline hydrochloride
Antidepressant Drugs	4770	79464020	Citalopram 40mg tablets	Citalopram hydrobromide
Antidepressant Drugs	67730	3867020	Sertraline 50mg tablets (Ranbaxy (UK) Ltd)	Sertraline hydrochloride
Antidepressant Drugs	52354	38526020	Citalopram 20mg tablets (DE Pharmaceuticals)	Citalopram hydrobromide
Antidepressant Drugs	71848	30395020	Citalopram 20mg/5ml oral suspension	Citalopram hydrobromide
Antidepressant Drugs	488	74050020	Sertraline 50mg tablets	Sertraline hydrochloride
Antidepressant Drugs	4075	69656020	Fluoxetine 60mg capsules	Fluoxetine hydrochloride
Antidepressant Drugs	513	77306020	Citalopram 40mg/ml oral drops sugar free	Citalopram hydrochloride
Antidepressant Drugs	56009	3990020	Citalopram 20mg tablets (Arrow Generics Ltd)	Citalopram hydrobromide
Antidepressant Drugs	6360	55602020	Cipralex 20mg tablets (Lundbeck Ltd)	Escitalopram oxalate
Antidepressant Drugs	34356	65381020	Citalopram 20mg tablets (A A H Pharmaceuticals Ltd)	Citalopram hydrobromide
Antidepressant Drugs	2548	69655020	Fluoxetine 20mg/5ml oral solution	Fluoxetine hydrochloride
Antidepressant Drugs	1712	79420020	Cipramil 20mg tablets (Lundbeck Ltd)	Citalopram hydrobromide
Antidepressant Drugs	34216	64717020	Fluoxetine 20mg/5ml oral solution (A A H Pharmaceuticals Ltd)	Fluoxetine hydrochloride
Antidepressant Drugs	55146	71728020	Sertraline 100mg tablets (A A H Pharmaceuticals Ltd)	Sertraline hydrochloride
Antidepressant Drugs	62335	24095021	Olena 20mg dispersible tablets (AMCo)	Fluoxetine hydrochloride
Antidepressant Drugs	52100	4007020	Citalopram 10mg tablets (Arrow Generics Ltd)	Citalopram hydrobromide
Antidepressant Drugs	55488	72091020	Sertraline 50mg tablets (Teva UK Ltd)	Sertraline hydrochloride
Antidepressant Drugs	45329	61452020	Fluoxetine 20mg capsules (Actavis UK Ltd)	Fluoxetine hydrochloride
Antidepressant Drugs	42107	61420020	Fluoxetine 20mg capsules (Niche Generics Ltd)	Fluoxetine hydrochloride
Antidepressant Drugs	69525	69534021	Fluoxetine 20mg capsules (Medreich Plc)	Fluoxetine hydrochloride
Antidepressant Drugs	34722	65257020	Citalopram 20mg Tablet (Neo Laboratories Ltd)	Citalopram hydrobromide
Antidepressant Drugs	45915	75620020	Sertraline 50mg tablets (Almus Pharmaceuticals Ltd)	Sertraline hydrochloride
Antidepressant Drugs	40726	97169020	Escitalopram 20mg/ml oral drops sugar free	Escitalopram oxalate
Antidepressant Drugs	72773	26793021	Escitalopram 20mg tablets (Teva UK Ltd)	Escitalopram oxalate
Antidepressant Drugs	73417	71219020	Citalopram 20mg tablets (PLIVA Pharma Ltd)	Citalopram hydrobromide
Antidepressant Drugs	71005	38527020	Citalopram 10mg tablets (DE Pharmaceuticals)	Citalopram hydrobromide
Antidepressant Drugs	70790	4031020	Citalopram 40mg tablets (Aurobindo Pharma Ltd)	Citalopram hydrobromide
Antidepressant Drugs	29756	88348020	Paxoran 20mg Tablet (Ranbaxy (UK) Ltd)	Citalopram hydrobromide
Antidepressant Drugs	45224	61387020	Fluoxetine 20mg capsules (Sandoz Ltd)	Fluoxetine hydrochloride
Antidepressant Drugs	61503	72038020	Sertraline 100mg tablets (Actavis UK Ltd)	Sertraline hydrochloride
Antidepressant Drugs	19470	63016020	Fluoxetine 20mg capsules (Ranbaxy (UK) Ltd)	Fluoxetine hydrochloride
Antidepressant Drugs	66560	72235020	Sertraline 100mg tablets (Mylan)	Sertraline hydrochloride
Antidepressant Drugs	41062	97171020	Cipralex 20mg/ml oral drops (Lundbeck Ltd)	Escitalopram oxalate
Antidepressant Drugs	4011	79510020	Nefazodone 200mg tablets	Nefazodone hydrochloride
Antidepressant Drugs	69571	4030020	Citalopram 40mg tablets (Accord Healthcare Ltd)	Citalopram hydrobromide
Antidepressant Drugs	62692	3894020	Sertraline 100mg tablets (Bristol Laboratories Ltd)	Sertraline hydrochloride
Antidepressant Drugs	26016	65128020	Citalopram 20mg tablets (Sandoz Ltd)	Citalopram hydrobromide
Antidepressant Drugs	252	69507020	Prozac 20mg/5ml liquid (Eli Lilly and Company Ltd)	Fluoxetine hydrochloride
Antidepressant Drugs	45223	66688020	Citalopram 40mg tablets (Niche Generics Ltd)	Citalopram hydrobromide
Antidepressant Drugs	72124	76363020	Citalopram 40mg/ml oral drops sugar free (Teva UK Ltd)	Citalopram hydrochloride
Antidepressant Drugs	34822	66152020	Citalopram 20mg tablets (Zentiva)	Citalopram hydrobromide
Antidepressant Drugs	73962	72112020	Sertraline 100mg tablets (Wockhardt UK Ltd)	Sertraline hydrochloride
Antidepressant Drugs	55033	38528020	Citalopram 40mg tablets (DE Pharmaceuticals)	Citalopram hydrobromide
Antidepressant Drugs	48045	66244020	Fluvoxamine 100mg tablets (A A H Pharmaceuticals Ltd)	Fluvoxamine maleate
Antidepressant Drugs	43518	60735020	Fluvoxamine 100mg tablets (IVAX Pharmaceuticals UK Ltd)	Fluvoxamine maleate
Antidepressant Drugs	52607	3997020	Citalopram 20mg tablets (Bristol Laboratories Ltd)	Citalopram hydrobromide
Antidepressant Drugs	44861	62693020	Fluvoxamine 100mg tablets (Actavis UK Ltd)	Fluvoxamine maleate
Antidepressant Drugs	42387	72034020	Sertraline 50mg tablets (Actavis UK Ltd)	Sertraline hydrochloride
Antidepressant Drugs	34970	66685020	Citalopram 20mg tablets (Niche Generics Ltd)	Citalopram hydrobromide
Antidepressant Drugs	34415	66454020	Citalopram 20mg tablets (Mylan)	Citalopram hydrobromide
Antidepressant Drugs	2897	62073020	Faverin 50mg tablets (Mylan)	Fluvoxamine maleate
Antidepressant Drugs	68756	72024020	Sertraline 100mg tablets (Sandoz Ltd)	Sertraline hydrochloride
Antidepressant Drugs	7328	90497020	Sertraline 50mg/5ml oral suspension	Sertraline hydrochloride
Antidepressant Drugs	34436	66451020	Citalopram 10mg tablets (Mylan)	Citalopram hydrobromide
Antidepressant Drugs	62693	3875020	Sertraline 50mg tablets (Bristol Laboratories Ltd)	Sertraline hydrochloride
Antidepressant Drugs	22	69654020	Fluoxetine 20mg capsules	Fluoxetine hydrochloride
Antidepressant Drugs	33410	61616020	Fluoxetine 20mg capsules (Zentiva)	Fluoxetine hydrochloride
Antidepressant Drugs	45316	61439020	Fluoxetine 20mg capsules (Wockhardt UK Ltd)	Fluoxetine hydrochloride
Antidepressant Drugs	3861	79421020	Cipramil 10mg tablets (Lundbeck Ltd)	Citalopram hydrobromide
Antidepressant Drugs	29786	82055020	Ranflutin 20mg capsules (Ranbaxy (UK) Ltd)	Fluoxetine hydrochloride
Antidepressant Drugs	1612	74046020	Lustral 50mg tablets (Pfizer Ltd)	Sertraline hydrochloride
Antidepressant Drugs	72373	69084020	Citalopram 20mg tablets (Ranbaxy (UK) Ltd)	Citalopram hydrobromide
Antidepressant Drugs	67496	69958021	Fluoxetine 30mg capsules	Fluoxetine hydrochloride
Antidepressant Drugs	44944	72095020	Sertraline 100mg tablets (Teva UK Ltd)	Sertraline hydrochloride
Antidepressant Drugs	63916	26791021	Escitalopram 10mg tablets (Actavis UK Ltd)	Escitalopram oxalate
Antidepressant Drugs	59358	3843020	Fluoxetine 20mg capsules (Milpharm Ltd)	Fluoxetine hydrochloride
Antidepressant Drugs	4554	79509020	Nefazodone 100mg tablets	Nefazodone hydrochloride
Antidepressant Drugs	54933	72071020	Sertraline 100mg tablets (PLIVA Pharma Ltd)	Sertraline hydrochloride
Antidepressant Drugs	58476	4002020	Citalopram 20mg tablets (Aurobindo Pharma Ltd)	Citalopram hydrobromide
Antidepressant Drugs	58723	39811020	Sertraline 50mg tablets (Accord Healthcare Ltd)	Sertraline hydrochloride
Antidepressant Drugs	59600	75616020	Sertraline 100mg tablets (Almus Pharmaceuticals Ltd)	Sertraline hydrochloride
Antidepressant Drugs	41528	68042020	Citalopram 10mg tablets (Teva UK Ltd)	Citalopram hydrobromide
Antidepressant Drugs	69725	48020021	Sertraline 50mg tablets (Crescent Pharma Ltd)	Sertraline hydrochloride
Antidepressant Drugs	59650	4014020	Citalopram 10mg tablets (Aurobindo Pharma Ltd)	Citalopram hydrobromide
Antidepressant Drugs	34849	66273020	Fluoxetine 20mg capsules (Tillomed Laboratories Ltd)	Fluoxetine hydrochloride
Antidepressant Drugs	69726	48021021	Sertraline 100mg tablets (Crescent Pharma Ltd)	Sertraline hydrochloride
Antidepressant Drugs	63481	3878020	Sertraline 50mg tablets (Milpharm Ltd)	Sertraline hydrochloride
Antidepressant Drugs	33720	71225020	Citalopram 10mg tablets (IVAX Pharmaceuticals UK Ltd)	Citalopram hydrobromide
Antidepressant Drugs	60568	47300020	Citalopram 20mg tablets (Waymade Healthcare Plc)	Citalopram hydrobromide
Antidepressant Drugs	648	86222020	Cipralex 10mg tablets (Lundbeck Ltd)	Escitalopram oxalate
Antidepressant Drugs	33779	80777020	Prozit 20mg/5ml oral solution (Pinewood Healthcare)	Fluoxetine hydrochloride
Antidepressant Drugs	46977	67898020	Citalopram 40mg tablets (Actavis UK Ltd)	Citalopram hydrobromide
Antidepressant Drugs	42660	71373020	Citalopram 10mg tablets (Almus Pharmaceuticals Ltd)	Citalopram hydrobromide
Antidepressant Drugs	57532	3831020	Prozac 20mg capsules (Waymade Healthcare Plc)	Fluoxetine hydrochloride
Antidepressant Drugs	69941	70393021	Fluoxetine 10mg capsules (A A H Pharmaceuticals Ltd)	Fluoxetine hydrochloride
Antidepressant Drugs	4907	69508020	Prozac 60mg capsules (Eli Lilly and Company Ltd)	Fluoxetine hydrochloride
Antidepressant Drugs	36746	65386020	Citalopram 40mg tablets (A A H Pharmaceuticals Ltd)	Citalopram hydrobromide
Antidepressant Drugs	58664	72232020	Sertraline 50mg tablets (Mylan)	Sertraline hydrochloride
Antidepressant Drugs	34871	67893020	Citalopram 20mg tablets (Actavis UK Ltd)	Citalopram hydrobromide
Antidepressant Drugs	603	78768020	Escitalopram 10mg tablets	Escitalopram oxalate
Antidepressant Drugs	66744	23063021	Fluoxetine 20mg capsules (Morningside Healthcare Ltd)	Fluoxetine hydrochloride
Antidepressant Drugs	54827	30393020	Citalopram 10mg/5ml oral suspension	Citalopram hydrobromide
Antidepressant Drugs	67092	47289020	Fluoxetine 20mg capsules (Waymade Healthcare Plc)	Fluoxetine hydrochloride
Antidepressant Drugs	6218	53823020	Escitalopram 20mg tablets	Escitalopram oxalate
Antidepressant Drugs	60619	3844020	Fluoxetine 20mg/5ml oral solution (Kent Pharmaceuticals Ltd)	Fluoxetine hydrochloride
Antidepressant Drugs	63441	44246021	Citalopram 10mg tablets (Rivopharm (UK) Ltd)	Citalopram hydrobromide
Antidepressant Drugs	33071	49680020	Felicium 20mg capsules (Opus Pharmaceuticals Ltd)	Fluoxetine hydrochloride
Antidepressant Drugs	71852	3842020	Fluoxetine 20mg capsules (Accord Healthcare Ltd)	Fluoxetine hydrochloride
Antidepressant Drugs	32546	88346020	Paxoran 10mg Tablet (Ranbaxy (UK) Ltd)	Citalopram hydrobromide
Antidepressant Drugs	53394	3985020	Citalopram 20mg tablets (Alliance Healthcare (Distribution) Ltd)	Citalopram hydrobromide
Antidepressant Drugs	42803	66129020	Fluoxetine 20mg/5ml oral solution (IVAX Pharmaceuticals UK Ltd)	Fluoxetine hydrochloride
Antidepressant Drugs	45247	62975020	Fluoxetine 20mg capsules (Fannin UK Ltd)	Fluoxetine hydrochloride
Antidepressant Drugs	4352	74047020	Lustral 100mg tablets (Pfizer Ltd)	Sertraline hydrochloride
Antidepressant Drugs	56355	47301020	Citalopram 10mg tablets (Waymade Healthcare Plc)	Citalopram hydrobromide
Antidepressant Drugs	73759	33814020	Sertraline 20mg/5ml oral suspension	Sertraline hydrochloride
Antidepressant Drugs	19183	61084020	Fluoxetine 20mg capsules (A A H Pharmaceuticals Ltd)	Fluoxetine hydrochloride
Antidepressant Drugs	53787	4011020	Citalopram 10mg tablets (Bristol Laboratories Ltd)	Citalopram hydrobromide
Antidepressant Drugs	48026	71376020	Citalopram 20mg tablets (Almus Pharmaceuticals Ltd)	Citalopram hydrobromide
Antidepressant Drugs	49165	4004020	Citalopram 10mg tablets (Alliance Healthcare (Distribution) Ltd)	Citalopram hydrobromide
Antidepressant Drugs	45286	66680020	Citalopram 10mg tablets (Niche Generics Ltd)	Citalopram hydrobromide
Antidepressant Drugs	52408	4003020	Citalopram 10mg tablets (Kent Pharmaceuticals Ltd)	Citalopram hydrobromide
Antidepressant Drugs	36893	93984020	Fluoxetine 20mg/5ml oral solution sugar free	Fluoxetine hydrochloride
Antidepressant Drugs	34466	65131020	Citalopram 40mg tablets (Sandoz Ltd)	Citalopram hydrobromide
Antidepressant Drugs	2880	62069020	Fluvoxamine 50mg tablets	Fluvoxamine maleate
Antidepressant Drugs	62927	72107020	Sertraline 50mg tablets (Wockhardt UK Ltd)	Sertraline hydrochloride
Antidepressant Drugs	14740	80679020	Oxactin 20mg capsules (Discovery Pharmaceuticals)	Fluoxetine hydrochloride
Antidepressant Drugs	61335	3838020	Prozac 20mg capsules (Mawdsley-Brooks & Company Ltd)	Fluoxetine hydrochloride
Antidepressant Drugs	48220	3837020	Prozac 20mg capsules (Lexon (UK) Ltd)	Fluoxetine hydrochloride
Antidepressant Drugs	56292	4037020	Citalopram 40mg/ml oral drops sugar free (Actavis UK Ltd)	Citalopram hydrochloride
Antidepressant Drugs	64423	4013020	Citalopram 10mg tablets (Accord Healthcare Ltd)	Citalopram hydrobromide
Antidepressant Drugs	42499	98001020	Fluoxetine 10mg tablets	Fluoxetine hydrochloride
Antidepressant Drugs	476	79463020	Citalopram 10mg tablets	Citalopram hydrobromide
Antidepressant Drugs	34498	65254020	Citalopram 10mg Tablet (Neo Laboratories Ltd)	Citalopram hydrobromide
Antidepressant Drugs	60888	4010020	Citalopram 10mg tablets (Sigma Pharmaceuticals Plc)	Citalopram hydrobromide
Antidepressant Drugs	60138	23601021	Fluoxetine 20mg orodispersible tablets sugar free	Fluoxetine hydrochloride
Antidepressant Drugs	32401	71725020	Sertraline 50mg tablets (A A H Pharmaceuticals Ltd)	Sertraline hydrochloride
Antidepressant Drugs	67736	71805020	Fluoxetine 20mg capsules (Dr Reddy's Laboratories (UK) Ltd)	Fluoxetine hydrochloride
Antidepressant Drugs	62819	33810020	Sertraline 12.5mg/5ml oral suspension	Sertraline hydrochloride
Antidepressant Drugs	12207	63638020	Isocarboxazid 10mg tablets	Isocarboxazid
Antidepressant Drugs	41731	59180020	Isocarboxazid 10mg Tablet (Cambridge Laboratories Ltd)	Isocarboxazid
Antidepressant Drugs	12503	50286020	Marplan 10mg Tablet (Cambridge Laboratories Ltd)	Isocarboxazid
Antidepressant Drugs	3955	67148020	Tranylcypromine with trifluoperazine Tablet	Trifluoperazine Hydrochloride/Tranylcypromine Sulphate
Antidepressant Drugs	3356	51013020	Parstelin Tablet (GlaxoSmithKline Consumer Healthcare)	Trifluoperazine Hydrochloride/Tranylcypromine Sulphate
Antidepressant Drugs	24890	69003020	Trifluoperazine with tranylcypromine 1mg + 10mg Tablet	Trifluoperazine Hydrochloride/Tranylcypromine Sulphate
Antidepressant Drugs	25945	63632020	Iproniazid 25mg	Iproniazide
Antidepressant Drugs	4321	65635020	Phenelzine 15mg tablets	Phenelzine sulfate
Antidepressant Drugs	3349	50620020	Nardil 15mg tablets (Kyowa Kirin Ltd)	Phenelzine sulfate
Antidepressant Drugs	18290	50297020	Marsilid 25mg Tablet (Roche Products Ltd)	Iproniazide
Antidepressant Drugs	3783	67145020	Tranylcypromine 10mg tablets	Tranylcypromine sulfate
Antidepressant Drugs	41654	65266020	Tranylcypromine 10mg tablets (AMCo)	Tranylcypromine sulfate
Antidepressant Drugs	10787	51010020	Parnate 10mg Tablet (Goldshield Pharmaceuticals Ltd)	Tranylcypromine sulfate
Antidepressant Drugs	9206	71994020	Manerix 150mg tablets (Meda Pharmaceuticals Ltd)	Moclobemide
Antidepressant Drugs	5832	71995020	Manerix 300mg tablets (Meda Pharmaceuticals Ltd)	Moclobemide
Antidepressant Drugs	41747	63795020	Moclobemide 150mg tablets (Teva UK Ltd)	Moclobemide
Antidepressant Drugs	5187	72032020	Moclobemide 300mg tablets	Moclobemide
Antidepressant Drugs	67305	3800020	Moclobemide 150mg tablets (Sigma Pharmaceuticals Plc)	Moclobemide
Antidepressant Drugs	2883	72031020	Moclobemide 150mg tablets	Moclobemide
Antidepressant Drugs	54686	47014020	Tryptophan 500mg capsules	Tryptophan
Antidepressant Drugs	6895	88847020	Duloxetine 60mg gastro-resistant capsules	Duloxetine hydrochloride
Antidepressant Drugs	68933	69154020	Mirtazapine 30mg tablets (PLIVA Pharma Ltd)	Mirtazapine
Antidepressant Drugs	43968	97351020	Foraven XL 75mg capsules (Forum Products Ltd)	Venlafaxine hydrochloride
Antidepressant Drugs	59923	43833020	Venlafaxine 37.5mg tablets (Bristol Laboratories Ltd)	Venlafaxine hydrochloride
Antidepressant Drugs	10083	86971020	Zispin SolTab 30mg orodispersible tablets (Merck Sharp & Dohme Ltd)	Mirtazapine
Antidepressant Drugs	43253	74702020	Mirtazapine 15mg orodispersible tablets (A A H Pharmaceuticals Ltd)	Mirtazapine
Antidepressant Drugs	40049	96451020	ViePax XL 150mg tablets (Dexcel-Pharma Ltd)	Venlafaxine hydrochloride
Antidepressant Drugs	59563	3963020	Venlafaxine 75mg modified-release capsules (Kent Pharmaceuticals Ltd)	Venlafaxine hydrochloride
Antidepressant Drugs	43334	96616020	Venlafaxine 150mg modified-release capsules (Sandoz Ltd)	Venlafaxine hydrochloride
Antidepressant Drugs	73868	76969021	Duloxetine 60mg gastro-resistant capsules (Aspire Pharma Ltd)	Duloxetine hydrochloride
Antidepressant Drugs	67563	69738021	Vensir XL 225mg capsules (Morningside Healthcare Ltd)	Venlafaxine hydrochloride
Antidepressant Drugs	48199	97656020	Ranfaxine XL 75mg capsules (Ranbaxy (UK) Ltd)	Venlafaxine hydrochloride
Antidepressant Drugs	52516	3977020	Alventa XL 150mg capsules (Consilient Health Ltd)	Venlafaxine hydrochloride
Antidepressant Drugs	70315	75120021	Vencarm XL 75mg capsules (Aspire Pharma Ltd)	Venlafaxine hydrochloride
Antidepressant Drugs	57751	98350020	Tonpular XL 150mg capsules (Wockhardt UK Ltd)	Venlafaxine hydrochloride
Antidepressant Drugs	69965	48891021	Duloxetine 60mg gastro-resistant capsules (Consilient Health Ltd)	Duloxetine hydrochloride
Antidepressant Drugs	40048	96449020	ViePax XL 75mg tablets (Dexcel-Pharma Ltd)	Venlafaxine hydrochloride
Antidepressant Drugs	70931	78209021	Venlasov XL 75mg capsules (Sovereign Medical Ltd)	Venlafaxine hydrochloride
Antidepressant Drugs	50892	9892020	Zispin SolTab 15mg orodispersible tablets (Necessity Supplies Ltd)	Mirtazapine
Antidepressant Drugs	43246	74967020	Mirtazapine 15mg orodispersible tablets (Genus Pharmaceuticals Ltd)	Mirtazapine
Antidepressant Drugs	43241	76512020	Mirtazapine 15mg orodispersible tablets (Aurobindo Pharma Ltd)	Mirtazapine
Antidepressant Drugs	40277	96355020	Vensir XL 75mg capsules (Morningside Healthcare Ltd)	Venlafaxine hydrochloride
Antidepressant Drugs	69420	76515020	Mirtazapine 30mg orodispersible tablets (Aurobindo Pharma Ltd)	Mirtazapine
Antidepressant Drugs	62734	35023020	Venlafaxine 150mg/5ml oral suspension	Venlafaxine hydrochloride
Antidepressant Drugs	70495	75219021	Vencarm XL 225mg capsules (Aspire Pharma Ltd)	Venlafaxine hydrochloride
Antidepressant Drugs	43247	74977020	Mirtazapine 45mg orodispersible tablets (Genus Pharmaceuticals Ltd)	Mirtazapine
Antidepressant Drugs	4726	85251020	Zispin 30mg tablets (Organon Laboratories Ltd)	Mirtazapine
Antidepressant Drugs	71782	60270021	Venlafaxine 150mg modified-release capsules (Mawdsley-Brooks & Company Ltd)	Venlafaxine hydrochloride
Antidepressant Drugs	69819	75214021	Vencarm XL 37.5mg capsules (Aspire Pharma Ltd)	Venlafaxine hydrochloride
Antidepressant Drugs	470	85108020	Venlafaxine 75mg modified-release capsules	Venlafaxine hydrochloride
Antidepressant Drugs	74010	3980020	Efexor XL 150mg capsules (Necessity Supplies Ltd)	Venlafaxine hydrochloride
Antidepressant Drugs	70728	61394021	Duloxetine 30mg gastro-resistant capsules (Alliance Healthcare (Distribution) Ltd)	Duloxetine hydrochloride
Antidepressant Drugs	60449	76118020	Venlafaxine 75mg tablets (A A H Pharmaceuticals Ltd)	Venlafaxine hydrochloride
Antidepressant Drugs	44937	99208020	Venlaneo XL 75mg capsules (Kent Pharmaceuticals Ltd)	Venlafaxine hydrochloride
Antidepressant Drugs	4422	67310020	Tryptophan 500mg tablets	Tryptophan
Antidepressant Drugs	40407	96841020	Venlalic XL 225mg tablets (Ethypharm UK Ltd)	Venlafaxine hydrochloride
Antidepressant Drugs	67271	3934020	Efexor 37.5mg tablets (Waymade Healthcare Plc)	Venlafaxine hydrochloride
Antidepressant Drugs	45806	99679020	Venlafaxine 37.5mg modified-release tablets	Venlafaxine hydrochloride
Antidepressant Drugs	65618	48892021	Duloxetine 30mg gastro-resistant capsules (A A H Pharmaceuticals Ltd)	Duloxetine hydrochloride
Antidepressant Drugs	3951	49503020	Fluanxol 1mg tablets (Lundbeck Ltd)	Flupentixol dihydrochloride
Antidepressant Drugs	41033	96239020	Rodomel XL 75mg capsules (Teva UK Ltd)	Venlafaxine hydrochloride
Antidepressant Drugs	40092	96357020	Vensir XL 150mg capsules (Morningside Healthcare Ltd)	Venlafaxine hydrochloride
Antidepressant Drugs	66412	53771021	Duloxetine 30mg gastro-resistant capsules (DE Pharmaceuticals)	Duloxetine hydrochloride
Antidepressant Drugs	43234	74033020	Mirtazapine 45mg orodispersible tablets (Teva UK Ltd)	Mirtazapine
Antidepressant Drugs	54644	9876020	Mirtazapine 15mg tablets (Pfizer Ltd)	Mirtazapine
Antidepressant Drugs	40764	96439020	ViePax 37.5mg tablets (Dexcel-Pharma Ltd)	Venlafaxine hydrochloride
Antidepressant Drugs	43235	74708020	Mirtazapine 45mg orodispersible tablets (A A H Pharmaceuticals Ltd)	Mirtazapine
Antidepressant Drugs	40817	96331020	Tardcaps XL 150mg capsules (IXL Pharma Ltd)	Venlafaxine hydrochloride
Antidepressant Drugs	61236	47299020	Bonilux XL 150mg capsules (Sandoz Ltd)	Venlafaxine hydrochloride
Antidepressant Drugs	9182	48377020	Efexor 75mg tablets (Wyeth Pharmaceuticals)	Venlafaxine hydrochloride
Antidepressant Drugs	39770	96465020	Tifaxin XL 75mg capsules (Genus Pharmaceuticals Ltd)	Venlafaxine hydrochloride
Antidepressant Drugs	5611	50868020	Optimax 500mg tablets (Intrapharm Laboratories Ltd)	Tryptophan
Antidepressant Drugs	6854	88881020	Mirtazapine 45mg tablets	Mirtazapine
Antidepressant Drugs	67874	54204021	Brintellix 10mg tablets (Lundbeck Ltd)	Vortioxetine hydrobromide
Antidepressant Drugs	600	62026020	Flupentixol 1mg tablets	Flupentixol dihydrochloride
Antidepressant Drugs	45664	98863020	Depefex XL 150mg capsules (Chiesi Ltd)	Venlafaxine hydrochloride
Antidepressant Drugs	68544	20925020	Mirtazapine 2mg capsules	Mirtazapine
Antidepressant Drugs	56662	76115020	Venlafaxine 37.5mg tablets (A A H Pharmaceuticals Ltd)	Venlafaxine hydrochloride
Antidepressant Drugs	9534	79511020	Nefazodone Starter pack	Nefazodone Hydrochloride
Antidepressant Drugs	63403	69054020	Mirtazapine 30mg tablets (Teva UK Ltd)	Mirtazapine
Antidepressant Drugs	55620	92819020	Flupentixol Liquid	Flupentixol Dihydrochloride
Antidepressant Drugs	40059	96834020	Venlalic XL 75mg tablets (Ethypharm UK Ltd)	Venlafaxine hydrochloride
Antidepressant Drugs	58681	19976021	Venladex XL 75mg tablets (Dexcel-Pharma Ltd)	Venlafaxine hydrochloride
Antidepressant Drugs	43250	74705020	Mirtazapine 30mg orodispersible tablets (A A H Pharmaceuticals Ltd)	Mirtazapine
Antidepressant Drugs	15163	84961020	Edronax 4mg tablets (Pfizer Ltd)	Reboxetine mesilate
Antidepressant Drugs	40515	97003020	Venaxx XL 75mg capsules (AMCo)	Venlafaxine hydrochloride
Antidepressant Drugs	43257	75309020	Mirtazapine 15mg tablets (Teva UK Ltd)	Mirtazapine
Antidepressant Drugs	43248	74684020	Mirtazapine 15mg orodispersible tablets (Focus Pharmaceuticals Ltd)	Mirtazapine
Antidepressant Drugs	71543	4058020	Mirtazapine 30mg tablets (Sigma Pharmaceuticals Plc)	Mirtazapine
Antidepressant Drugs	47966	68128020	Mirtazapine 15mg/ml oral solution sugar free (Rosemont Pharmaceuticals Ltd)	Mirtazapine
Antidepressant Drugs	68680	57434021	Mirtazapine 15mg orodispersible tablets (Mawdsley-Brooks & Company Ltd)	Mirtazapine
Antidepressant Drugs	60538	23710021	Mirtazapine 30mg tablets (DE Pharmaceuticals)	Mirtazapine
Antidepressant Drugs	742	85247020	Mirtazapine 30mg tablets	Mirtazapine
Antidepressant Drugs	43239	69827020	Mirtazapine 15mg tablets (A A H Pharmaceuticals Ltd)	Mirtazapine
Antidepressant Drugs	39359	96445020	Venlafaxine 75mg modified-release tablets	Venlafaxine hydrochloride
Antidepressant Drugs	69428	61393021	Duloxetine 60mg gastro-resistant capsules (Alliance Healthcare (Distribution) Ltd)	Duloxetine hydrochloride
Antidepressant Drugs	68096	60327021	Duloxetine 60mg gastro-resistant capsules (Zentiva)	Duloxetine hydrochloride
Antidepressant Drugs	65899	60862021	Efexor XL 225mg capsules (Pfizer Ltd)	Venlafaxine hydrochloride
Antidepressant Drugs	53321	21206020	Mirtazapine 15mg/ml oral solution sugar free (A A H Pharmaceuticals Ltd)	Mirtazapine
Antidepressant Drugs	40054	96838020	Venlafaxine 225mg modified-release tablets	Venlafaxine hydrochloride
Antidepressant Drugs	2356	84955020	Reboxetine 4mg tablets	Reboxetine mesilate
Antidepressant Drugs	71257	53422021	Venlafaxine 75mg modified-release capsules (DE Pharmaceuticals)	Venlafaxine hydrochloride
Antidepressant Drugs	63859	47297020	Venlafaxine 75mg tablets (Waymade Healthcare Plc)	Venlafaxine hydrochloride
Antidepressant Drugs	301	54686020	Venlafaxine 37.5mg tablets	Venlafaxine hydrochloride
Antidepressant Drugs	66437	53421021	Venlafaxine 75mg tablets (DE Pharmaceuticals)	Venlafaxine hydrochloride
Antidepressant Drugs	1474	85163020	Efexor XL 75mg capsules (Pfizer Ltd)	Venlafaxine hydrochloride
Antidepressant Drugs	53699	76425020	Mirtazapine 15mg tablets (Accord Healthcare Ltd)	Mirtazapine
Antidepressant Drugs	16154	87990020	Mirtazapine 15mg/ml oral solution sugar free	Mirtazapine
Antidepressant Drugs	61856	9884020	Mirtazapine 15mg orodispersible tablets (Consilient Health Ltd)	Mirtazapine
Antidepressant Drugs	50592	3818020	Fluanxol 1mg tablets (Sigma Pharmaceuticals Plc)	Flupentixol dihydrochloride
Antidepressant Drugs	63763	48890021	Duloxetine 60mg gastro-resistant capsules (A A H Pharmaceuticals Ltd)	Duloxetine hydrochloride
Antidepressant Drugs	74011	3959020	Efexor XL 75mg capsules (Dowelhurst Ltd)	Venlafaxine hydrochloride
Antidepressant Drugs	6481	87478020	Mirtazapine 45mg orodispersible tablets	Mirtazapine
Antidepressant Drugs	60370	9889020	Zispin SolTab 15mg orodispersible tablets (Mawdsley-Brooks & Company Ltd)	Mirtazapine
Antidepressant Drugs	8844	67314020	Tryptophan with ascorbic acid and pyridoxine powder	Pyridoxine Hydrochloride/Tryptophan/Ascorbic Acid
Antidepressant Drugs	58837	20695021	Venlafaxine 37.5mg modified-release capsules	Venlafaxine hydrochloride
Antidepressant Drugs	51699	35357020	Venlafaxine 37.5mg/5ml oral solution	Venlafaxine hydrochloride
Antidepressant Drugs	64223	75313020	Mirtazapine 45mg tablets (Teva UK Ltd)	Mirtazapine
Antidepressant Drugs	43242	71074020	Mirtazapine 15mg tablets (Genus Pharmaceuticals Ltd)	Mirtazapine
Antidepressant Drugs	40494	97028020	Agomelatine 25mg tablets	Agomelatine
Antidepressant Drugs	41299	96473020	Politid XL 75mg capsules (Actavis UK Ltd)	Venlafaxine hydrochloride
Antidepressant Drugs	63370	10981020	Duloxetine 30mg gastro-resistant capsules (Mawdsley-Brooks & Company Ltd)	Duloxetine hydrochloride
Antidepressant Drugs	65483	54203021	Vortioxetine 10mg tablets	Vortioxetine hydrobromide
Antidepressant Drugs	12221	50957020	Pacitron 500mg Tablet (Rorer Pharmaceuticals Ltd)	Tryptophan
Antidepressant Drugs	68876	60269021	Venlafaxine 75mg modified-release capsules (Mawdsley-Brooks & Company Ltd)	Venlafaxine hydrochloride
Antidepressant Drugs	64139	77228020	Mirtazapine 45mg orodispersible tablets (Mylan)	Mirtazapine
Antidepressant Drugs	59035	20696021	Venlablue XL 37.5mg capsules (Creo Pharma Ltd)	Venlafaxine hydrochloride
Antidepressant Drugs	66405	53768021	Duloxetine 60mg gastro-resistant capsules (DE Pharmaceuticals)	Duloxetine hydrochloride
Antidepressant Drugs	47945	68484020	Mirtazapine 30mg tablets (A A H Pharmaceuticals Ltd)	Mirtazapine
Antidepressant Drugs	46668	70353020	Mirtazapine 15mg tablets (Arrow Generics Ltd)	Mirtazapine
Antidepressant Drugs	56457	76076020	Venlafaxine 75mg tablets (Teva UK Ltd)	Venlafaxine hydrochloride
Antidepressant Drugs	39360	96447020	Venlafaxine 150mg modified-release tablets	Venlafaxine hydrochloride
Antidepressant Drugs	66890	54205021	Vortioxetine 20mg tablets	Vortioxetine hydrobromide
Antidepressant Drugs	67288	3947020	Efexor 75mg tablets (Dowelhurst Ltd)	Venlafaxine hydrochloride
Antidepressant Drugs	65892	53770021	Duloxetine 60mg gastro-resistant capsules (Mawdsley-Brooks & Company Ltd)	Duloxetine hydrochloride
Antidepressant Drugs	60895	76073020	Venlafaxine 37.5mg tablets (Teva UK Ltd)	Venlafaxine hydrochloride
Antidepressant Drugs	54342	38595020	Mirtazapine 15mg tablets (Medreich Plc)	Mirtazapine
Antidepressant Drugs	69991	54206021	Brintellix 20mg tablets (Lundbeck Ltd)	Vortioxetine hydrobromide
Antidepressant Drugs	40160	68213020	Mirtazapine 30mg tablets (Accord Healthcare Ltd)	Mirtazapine
Antidepressant Drugs	45959	98861020	Depefex XL 75mg capsules (Chiesi Ltd)	Venlafaxine hydrochloride
Antidepressant Drugs	60549	3975020	Venlafaxine 150mg modified-release capsules (Kent Pharmaceuticals Ltd)	Venlafaxine hydrochloride
Antidepressant Drugs	623	48376020	Efexor 37.5mg tablets (Wyeth Pharmaceuticals)	Venlafaxine hydrochloride
Antidepressant Drugs	53326	35359020	Venlafaxine 75mg/5ml oral solution	Venlafaxine hydrochloride
Antidepressant Drugs	40917	96441020	ViePax 75mg tablets (Dexcel-Pharma Ltd)	Venlafaxine hydrochloride
Antidepressant Drugs	68050	3944020	Venlafaxine 37.5mg tablets (Alliance Healthcare (Distribution) Ltd)	Venlafaxine hydrochloride
Antidepressant Drugs	65738	3939020	Efexor 37.5mg tablets (Sigma Pharmaceuticals Plc)	Venlafaxine hydrochloride
Antidepressant Drugs	65555	9886020	Mirtazapine 15mg orodispersible tablets (Sigma Pharmaceuticals Plc)	Mirtazapine
Antidepressant Drugs	52074	3966020	Alventa XL 75mg capsules (Consilient Health Ltd)	Venlafaxine hydrochloride
Antidepressant Drugs	56209	4060020	Mirtazapine 30mg tablets (Phoenix Healthcare Distribution Ltd)	Mirtazapine
Antidepressant Drugs	70353	53420021	Venlafaxine 37.5mg tablets (DE Pharmaceuticals)	Venlafaxine hydrochloride
Antidepressant Drugs	1222	54687020	Venlafaxine 75mg tablets	Venlafaxine hydrochloride
Antidepressant Drugs	5710	85164020	Efexor XL 150mg capsules (Pfizer Ltd)	Venlafaxine hydrochloride
Antidepressant Drugs	59753	47834020	Sunveniz XL 150mg tablets (Sun Pharmaceuticals UK Ltd)	Venlafaxine hydrochloride
Antidepressant Drugs	6421	87476020	Mirtazapine 15mg orodispersible tablets	Mirtazapine
Antidepressant Drugs	59954	9912020	Mirtazapine 45mg tablets (Almus Pharmaceuticals Ltd)	Mirtazapine
Antidepressant Drugs	66752	9879020	Mirtazapine 15mg tablets (Aurobindo Pharma Ltd)	Mirtazapine
Antidepressant Drugs	73540	79520021	Depalta 60mg gastro-resistant capsules (Disposable Medical Equipment Ltd)	Duloxetine hydrochloride
Antidepressant Drugs	63268	35361020	Venlafaxine 75mg/5ml oral suspension	Venlafaxine hydrochloride
Antidepressant Drugs	40517	96536020	Vexarin XL 150mg capsules (Mylan)	Venlafaxine hydrochloride
Antidepressant Drugs	69005	4061020	Mirtazapine 30mg tablets (Almus Pharmaceuticals Ltd)	Mirtazapine
Antidepressant Drugs	6846	87480020	Zispin SolTab 15mg orodispersible tablets (Merck Sharp & Dohme Ltd)	Mirtazapine
Antidepressant Drugs	64442	52348021	Duloxetine 60mg gastro-resistant capsules (Teva UK Ltd)	Duloxetine hydrochloride
Antidepressant Drugs	51383	10967020	Duloxetine 60mg gastro-resistant capsules (Sigma Pharmaceuticals Plc)	Duloxetine hydrochloride
Antidepressant Drugs	6795	88879020	Mirtazapine 15mg tablets	Mirtazapine
Antidepressant Drugs	70806	53423021	Venlafaxine 150mg modified-release capsules (DE Pharmaceuticals)	Venlafaxine hydrochloride
Antidepressant Drugs	59953	9878020	Mirtazapine 15mg tablets (Almus Pharmaceuticals Ltd)	Mirtazapine
Antidepressant Drugs	48698	41252020	Mirtazapine 15mg orodispersible tablets sugar free	Mirtazapine
Antidepressant Drugs	71806	27000021	Amphero XL 75mg capsules (Mylan)	Venlafaxine hydrochloride
Antidepressant Drugs	43673	96475020	Politid XL 150mg capsules (Actavis UK Ltd)	Venlafaxine hydrochloride
Antidepressant Drugs	49820	41254020	Mirtazapine 45mg orodispersible tablets sugar free	Mirtazapine
Antidepressant Drugs	40514	97005020	Venaxx XL 150mg capsules (AMCo)	Venlafaxine hydrochloride
Antidepressant Drugs	41314	96241020	Rodomel XL 150mg capsules (Teva UK Ltd)	Venlafaxine hydrochloride
Antidepressant Drugs	7122	88845020	Duloxetine 30mg gastro-resistant capsules	Duloxetine hydrochloride
Antidepressant Drugs	40295	97030020	Valdoxan 25mg tablets (Servier Laboratories Ltd)	Agomelatine
Antidepressant Drugs	2275	62025020	Flupentixol 500microgram tablets	Flupentixol dihydrochloride
Antidepressant Drugs	54747	47015020	Optimax 500mg capsules (Intrapharm Laboratories Ltd)	Tryptophan
Antidepressant Drugs	49511	3965020	Venlablue XL 75mg capsules (Creo Pharma Ltd)	Venlafaxine hydrochloride
Antidepressant Drugs	6488	86969020	Mirtazapine 30mg orodispersible tablets	Mirtazapine
Antidepressant Drugs	51280	3970020	Efexor XL 150mg capsules (Waymade Healthcare Plc)	Venlafaxine hydrochloride
Antidepressant Drugs	51361	3942020	Venlafaxine 37.5mg tablets (Ranbaxy (UK) Ltd)	Venlafaxine hydrochloride
Antidepressant Drugs	53543	9905020	Zispin SolTab 30mg orodispersible tablets (Necessity Supplies Ltd)	Mirtazapine
Antidepressant Drugs	65482	54207021	Vortioxetine 5mg tablets	Vortioxetine hydrobromide
Antidepressant Drugs	33337	69832020	Mirtazapine 45mg tablets (A A H Pharmaceuticals Ltd)	Mirtazapine
Antidepressant Drugs	73298	79522021	Depalta 30mg gastro-resistant capsules (Disposable Medical Equipment Ltd)	Duloxetine hydrochloride
Antidepressant Drugs	55482	77222020	Mirtazapine 15mg orodispersible tablets (Mylan)	Mirtazapine
Antidepressant Drugs	74190	60328021	Duciltia 60mg gastro-resistant capsules (Aristo Pharma Ltd)	Duloxetine hydrochloride
Antidepressant Drugs	39809	96467020	Tifaxin XL 150mg capsules (Genus Pharmaceuticals Ltd)	Venlafaxine hydrochloride
Antidepressant Drugs	14849	88851020	Cymbalta 60mg gastro-resistant capsules (Eli Lilly and Company Ltd)	Duloxetine hydrochloride
Antidepressant Drugs	52716	98348020	Tonpular XL 75mg capsules (Wockhardt UK Ltd)	Venlafaxine hydrochloride
Antidepressant Drugs	70405	52349021	Duloxetine 30mg gastro-resistant capsules (Teva UK Ltd)	Duloxetine hydrochloride
Antidepressant Drugs	59593	3813020	Fluanxol 500microgram tablets (Lexon (UK) Ltd)	Flupentixol dihydrochloride
Antidepressant Drugs	65666	60861021	Venlafaxine 225mg modified-release capsules	Venlafaxine hydrochloride
Antidepressant Drugs	67272	4050020	Zispin 30mg tablets (Waymade Healthcare Plc)	Mirtazapine
Antidepressant Drugs	40062	96836020	Venlalic XL 150mg tablets (Ethypharm UK Ltd)	Venlafaxine hydrochloride
Antidepressant Drugs	40815	96329020	Tardcaps XL 75mg capsules (IXL Pharma Ltd)	Venlafaxine hydrochloride
Antidepressant Drugs	58625	76428020	Mirtazapine 45mg tablets (Accord Healthcare Ltd)	Mirtazapine
Antidepressant Drugs	53648	74665020	Mirtazapine 30mg orodispersible tablets (Accord Healthcare Ltd)	Mirtazapine
Antidepressant Drugs	42600	96534020	Vexarin XL 75mg capsules (Mylan)	Venlafaxine hydrochloride
Antidepressant Drugs	44936	99210020	Venlaneo XL 150mg capsules (Kent Pharmaceuticals Ltd)	Venlafaxine hydrochloride
Antidepressant Drugs	50081	3976020	Venlablue XL 150mg capsules (Creo Pharma Ltd)	Venlafaxine hydrochloride
Antidepressant Drugs	20504	54978020	Optimax wv Tablet (E. Merck)	Tryptophan
Antidepressant Drugs	13151	88849020	Cymbalta 30mg gastro-resistant capsules (Eli Lilly and Company Ltd)	Duloxetine hydrochloride
Antidepressant Drugs	66580	9893020	Mirtazapine 15mg orodispersible tablets (Bluefish Pharmaceuticals AB)	Mirtazapine
Antidepressant Drugs	72211	53769021	Duloxetine 60mg gastro-resistant capsules (Dr Reddy's Laboratories (UK) Ltd)	Duloxetine hydrochloride
Antidepressant Drugs	64101	74662020	Mirtazapine 15mg orodispersible tablets (Accord Healthcare Ltd)	Mirtazapine
Antidepressant Drugs	65888	48889021	Duloxetine 60mg gastro-resistant capsules (Actavis UK Ltd)	Duloxetine hydrochloride
Antidepressant Drugs	73667	76173020	Venlafaxine 37.5mg tablets (Actavis UK Ltd)	Venlafaxine hydrochloride
Antidepressant Drugs	61547	24001021	Mirtazapine 15mg/ml oral solution sugar free (DE Pharmaceuticals)	Mirtazapine
Antidepressant Drugs	69992	54208021	Brintellix 5mg tablets (Lundbeck Ltd)	Vortioxetine hydrobromide
Antidepressant Drugs	70420	75121021	Vencarm XL 150mg capsules (Aspire Pharma Ltd)	Venlafaxine hydrochloride
Antidepressant Drugs	43237	74026020	Mirtazapine 15mg orodispersible tablets (Teva UK Ltd)	Mirtazapine
Antidepressant Drugs	71932	78210021	Venlasov XL 150mg capsules (Sovereign Medical Ltd)	Venlafaxine hydrochloride
Antidepressant Drugs	59694	9903020	Mirtazapine 30mg orodispersible tablets (Phoenix Healthcare Distribution Ltd)	Mirtazapine
Antidepressant Drugs	55501	76126020	Venlafaxine 150mg Modified-release capsule (Hillcross Pharmaceuticals Ltd)	Venlafaxine hydrochloride
Antidepressant Drugs	43236	74668020	Mirtazapine 45mg orodispersible tablets (Accord Healthcare Ltd)	Mirtazapine
Antidepressant Drugs	45818	99681020	Venlalic XL 37.5mg tablets (Ethypharm UK Ltd)	Venlafaxine hydrochloride
Antidepressant Drugs	55424	95179020	Venlafaxine	Venlafaxine Hydrochloride
Antidepressant Drugs	69752	60960021	Duloxetine 60mg gastro-resistant capsules (Creo Pharma Ltd)	Duloxetine hydrochloride
Antidepressant Drugs	43256	74689020	Mirtazapine 45mg orodispersible tablets (Focus Pharmaceuticals Ltd)	Mirtazapine
Antidepressant Drugs	3953	49502020	Fluanxol 500microgram tablets (Lundbeck Ltd)	Flupentixol dihydrochloride
Antidepressant Drugs	62688	10980020	Duloxetine 30mg gastro-resistant capsules (Sigma Pharmaceuticals Plc)	Duloxetine hydrochloride
Antidepressant Drugs	68052	9904020	Mirtazapine 30mg orodispersible tablets (Almus Pharmaceuticals Ltd)	Mirtazapine
Antidepressant Drugs	54012	41253020	Mirtazapine 15mg orodispersible tablets sugar free (Sandoz Ltd)	Mirtazapine
Antidepressant Drugs	65809	48893021	Duloxetine 30mg gastro-resistant capsules (Actavis UK Ltd)	Duloxetine hydrochloride
Antidepressant Drugs	50934	35355020	Venlafaxine 150mg/5ml oral solution	Venlafaxine hydrochloride
Antidepressant Drugs	73658	76176020	Venlafaxine 75mg tablets (Actavis UK Ltd)	Venlafaxine hydrochloride
Antidepressant Drugs	43203	96614020	Venlafaxine 75mg modified-release capsules (Sandoz Ltd)	Venlafaxine hydrochloride
Antidepressant Drugs	60843	47835020	Sunveniz XL 75mg tablets (Sun Pharmaceuticals UK Ltd)	Venlafaxine hydrochloride
Antidepressant Drugs	66183	9874020	Mirtazapine 15mg tablets (Alliance Healthcare (Distribution) Ltd)	Mirtazapine
Antidepressant Drugs	58291	9888020	Mirtazapine 15mg orodispersible tablets (Pfizer Ltd)	Mirtazapine
Antidepressant Drugs	2654	85109020	Venlafaxine 150mg modified-release capsules	Venlafaxine hydrochloride
Antidepressant Drugs	54792	4053020	Mirtazapine 30mg tablets (Alliance Healthcare (Distribution) Ltd)	Mirtazapine
Antidepressant Drugs	63216	10966020	Cymbalta 60mg gastro-resistant capsules (Mawdsley-Brooks & Company Ltd)	Duloxetine hydrochloride
Antidepressant Drugs	58726	19975021	Venladex XL 150mg tablets (Dexcel-Pharma Ltd)	Venlafaxine hydrochloride
Antidepressant Drugs	13237	89954020	Venlafaxine 37.5mg/5ml oral suspension	Venlafaxine hydrochloride
Antidepressant Drugs	15268	87482020	Zispin SolTab 45mg orodispersible tablets (Merck Sharp & Dohme Ltd)	Mirtazapine
Antidepressant Drugs	6274	48378020	Efexor 50mg tablets (Wyeth Pharmaceuticals)	Venlafaxine hydrochloride
Antidepressant Drugs	2617	54688020	Venlafaxine 50mg tablets	Venlafaxine hydrochloride
Antidepressant Drugs	48185	78577020	Mirtazapine 30mg orodispersible tablets (Almus Pharmaceuticals Ltd)	Mirtazapine
ACE/ARB	56850	84385020	Ecopace 12.5mg tablets (AMCo)	Captopril
ACE/ARB	34544	56638020	Captopril 12.5mg Tablet (IVAX Pharmaceuticals UK Ltd)	Captopril
ACE/ARB	26995	84491020	Kaplon 25mg tablets (Teva UK Ltd)	Captopril
ACE/ARB	3310	48565020	Capoten 12.5mg tablets (Bristol-Myers Squibb Pharmaceuticals Ltd)	Captopril
ACE/ARB	21943	84490020	Kaplon 12.5mg tablets (Teva UK Ltd)	Captopril
ACE/ARB	36742	93652020	Captopril 2mg/5ml oral suspension	Captopril
ACE/ARB	54544	19241020	Captopril 25mg/5ml oral suspension	Captopril
ACE/ARB	60823	21648021	Noyada 5mg/5ml oral solution (Martindale Pharmaceuticals Ltd)	Captopril
ACE/ARB	1121	60377020	Captopril 12.5mg tablets	Captopril
ACE/ARB	34937	56640020	Captopril 50mg Tablet (IVAX Pharmaceuticals UK Ltd)	Captopril
ACE/ARB	3839	48567020	Capoten 50mg tablets (Bristol-Myers Squibb Pharmaceuticals Ltd)	Captopril
ACE/ARB	37655	59733020	Captopril 25mg tablets (Teva UK Ltd)	Captopril
ACE/ARB	41633	56801020	Captopril 12.5mg tablets (Actavis UK Ltd)	Captopril
ACE/ARB	32514	84386020	Ecopace 25mg tablets (AMCo)	Captopril
ACE/ARB	30039	84463020	Tensopril 25mg tablets (Teva UK Ltd)	Captopril
ACE/ARB	43507	56634020	Captopril 25mg Tablet (Generics (UK) Ltd)	Captopril
ACE/ARB	17624	88718020	Captopril 5mg/5ml oral suspension	Captopril
ACE/ARB	52293	20854020	Captopril 2mg capsules	Captopril
ACE/ARB	34936	56686020	Captopril 25mg Tablet (Lagap)	Captopril
ACE/ARB	58195	19216020	Captopril 12.5mg/5ml oral solution	Captopril
ACE/ARB	60349	21646021	Noyada 25mg/5ml oral solution (Martindale Pharmaceuticals Ltd)	Captopril
ACE/ARB	43649	56644020	Captopril 25mg tablets (A A H Pharmaceuticals Ltd)	Captopril
ACE/ARB	46951	56643020	Captopril 12.5mg tablets (A A H Pharmaceuticals Ltd)	Captopril
ACE/ARB	64739	19240020	Captopril 25mg/5ml oral solution (Special Order)	Captopril
ACE/ARB	24482	85703020	Captomex 50mg tablets (Actavis UK Ltd)	Captopril
ACE/ARB	69599	19279020	Captopril 500micrograms/5ml oral suspension	Captopril
ACE/ARB	69192	91310020	Captopril oral solution	Captopril
ACE/ARB	56509	1375020	Capoten 12.5mg tablets (Dowelhurst Ltd)	Captopril
ACE/ARB	41743	59737020	Captopril 50mg tablets (Teva UK Ltd)	Captopril
ACE/ARB	46957	59293020	Captopril 12.5mg tablets (Tillomed Laboratories Ltd)	Captopril
ACE/ARB	43432	92446020	Captopril 6.25mg tablets	Captopril
ACE/ARB	34719	56635020	Captopril 50mg Tablet (Generics (UK) Ltd)	Captopril
ACE/ARB	35302	91890020	Captopril 12.5mg/5ml oral suspension	Captopril
ACE/ARB	52499	19239020	Captopril 25mg/5ml oral solution	Captopril
ACE/ARB	20849	84462020	Tensopril 12.5mg tablets (Teva UK Ltd)	Captopril
ACE/ARB	66597	19210020	Captopril 10mg/5ml oral suspension	Captopril
ACE/ARB	59699	21647021	Captopril 5mg/5ml oral solution sugar free	Captopril
ACE/ARB	33646	56633020	Captopril 12.5mg Tablet (Generics (UK) Ltd)	Captopril
ACE/ARB	28486	89909020	Captopril 6.25mg/5ml oral suspension	Captopril
ACE/ARB	41617	56802020	Captopril 25mg tablets (Actavis UK Ltd)	Captopril
ACE/ARB	39512	96425020	Captopril 25mg/5ml oral suspension	Captopril
ACE/ARB	1143	60378020	Captopril 25mg tablets	Captopril
ACE/ARB	70994	66757020	Captopril 12.5mg tablets (Sandoz Ltd)	Captopril
ACE/ARB	33336	69419020	Captopril 5mg/5ml Oral suspension (Eldon Laboratories)	Captopril
ACE/ARB	25998	85701020	Captomex 12.5mg tablets (Actavis UK Ltd)	Captopril
ACE/ARB	32048	84492020	Kaplon 50mg tablets (Teva UK Ltd)	Captopril
ACE/ARB	17633	87231020	Captopril 3mg/5ml oral solution	Captopril
ACE/ARB	34562	56639020	Captopril 25mg Tablet (IVAX Pharmaceuticals UK Ltd)	Captopril
ACE/ARB	18269	52608020	Acepril 12.5mg tablets (Bristol-Myers Squibb Pharmaceuticals Ltd)	Captopril
ACE/ARB	28820	85702020	Captomex 25mg tablets (Actavis UK Ltd)	Captopril
ACE/ARB	23478	84464020	Tensopril 50mg tablets (Teva UK Ltd)	Captopril
ACE/ARB	18325	52610020	Acepril 50mg tablets (Bristol-Myers Squibb Pharmaceuticals Ltd)	Captopril
ACE/ARB	44527	98847020	Captopril 5mg/ml oral solution sugar free	Captopril
ACE/ARB	69600	19229020	Captopril 1mg/5ml oral suspension	Captopril
ACE/ARB	1144	48566020	Capoten 25mg tablets (Bristol-Myers Squibb Pharmaceuticals Ltd)	Captopril
ACE/ARB	45228	91312020	Captopril capsules	Captopril
ACE/ARB	3069	52609020	Acepril 25mg tablets (Bristol-Myers Squibb Pharmaceuticals Ltd)	Captopril
ACE/ARB	46851	417021	Captopril 5mg/5ml oral solution	Captopril
ACE/ARB	15958	82305020	Captopril 2mg tablets	Captopril
ACE/ARB	59915	21645021	Captopril 25mg/5ml oral solution sugar free	Captopril
ACE/ARB	1807	60379020	Captopril 50mg tablets	Captopril
ACE/ARB	15605	49385020	Cilazapril 250micrograms tablets	Cilazapril
ACE/ARB	23642	50587020	Vascace 0.25mg Tablet (Roche Products Ltd)	Cilazapril
ACE/ARB	16196	55291020	Vascace 5mg tablets (Roche Products Ltd)	Cilazapril monohydrate
ACE/ARB	12574	49387020	Cilazapril 1mg tablets	Cilazapril monohydrate
ACE/ARB	12412	54164020	Cilazapril 2.5mg tablets	Cilazapril monohydrate
ACE/ARB	21053	50588020	Vascace 500microgram tablets (Roche Products Ltd)	Cilazapril monohydrate
ACE/ARB	12411	49386020	Cilazapril 500microgram tablets	Cilazapril monohydrate
ACE/ARB	16212	50589020	Vascace 1mg tablets (Roche Products Ltd)	Cilazapril monohydrate
ACE/ARB	16197	55290020	Vascace 2.5mg tablets (Roche Products Ltd)	Cilazapril monohydrate
ACE/ARB	13026	54165020	Cilazapril 5mg tablets	Cilazapril monohydrate
ACE/ARB	42908	61247020	Enalapril 5mg tablets (IVAX Pharmaceuticals UK Ltd)	Enalapril maleate
ACE/ARB	34768	61253020	Enalapril 20mg tablets (IVAX Pharmaceuticals UK Ltd)	Enalapril maleate
ACE/ARB	20188	60798020	Enalapril 2.5mg wafer	Enalapril Maleate
ACE/ARB	34453	61301020	Enalapril 20mg tablets (Mylan)	Enalapril maleate
ACE/ARB	16708	60797020	Enalapril titration pack	Enalapril Maleate
ACE/ARB	8106	55119020	Innovace 2.5mg tablets (Merck Sharp & Dohme Ltd)	Enalapril maleate
ACE/ARB	41417	60324020	Enalapril 2.5mg tablets (A A H Pharmaceuticals Ltd)	Enalapril maleate
ACE/ARB	43563	61391020	Enalapril 2.5mg tablets (Zentiva)	Enalapril maleate
ACE/ARB	61133	1425020	Enalapril 10mg tablets (Phoenix Healthcare Distribution Ltd)	Enalapril maleate
ACE/ARB	23252	73042020	Pralenal 10 tablets (Opus Pharmaceuticals Ltd)	Enalapril maleate
ACE/ARB	27871	86081020	Innovace melt 10mg Wafer (Merck Sharp & Dohme Ltd)	Enalapril Maleate
ACE/ARB	8105	58451020	Innovace 20mg tablets (Merck Sharp & Dohme Ltd)	Enalapril maleate
ACE/ARB	45217	63368020	Enalapril 5mg tablets (Kent Pharmaceuticals Ltd)	Enalapril maleate
ACE/ARB	34400	55722020	Enalapril 5mg Tablet (Dowelhurst Ltd)	Enalapril maleate
ACE/ARB	62860	21324021	Enalapril 5mg tablets (DE Pharmaceuticals)	Enalapril maleate
ACE/ARB	22439	83449020	Ednyt 20mg Tablet (Dominion Pharma)	Enalapril maleate
ACE/ARB	34798	61362020	Enalapril 20mg tablets (Sandoz Ltd)	Enalapril maleate
ACE/ARB	52010	1418020	Enalapril 10mg tablets (Alliance Healthcare (Distribution) Ltd)	Enalapril maleate
ACE/ARB	53915	61780020	Enalapril 5mg tablets (Dexcel-Pharma Ltd)	Enalapril maleate
ACE/ARB	34953	61397020	Enalapril 20mg tablets (Zentiva)	Enalapril maleate
ACE/ARB	31587	86077020	Innovace melt 20mg Wafer (Merck Sharp & Dohme Ltd)	Enalapril Maleate
ACE/ARB	32241	60326020	Enalapril 10mg tablets (A A H Pharmaceuticals Ltd)	Enalapril maleate
ACE/ARB	46974	61297020	Enalapril 5mg tablets (Mylan)	Enalapril maleate
ACE/ARB	60143	38499020	Enalapril 5mg tablets (Medreich Plc)	Enalapril maleate
ACE/ARB	41694	61246020	Enalapril 2.5mg tablets (IVAX Pharmaceuticals UK Ltd)	Enalapril maleate
ACE/ARB	22708	77941020	Enalapril 5mg wafer	Enalapril Maleate
ACE/ARB	37087	94156020	Enalapril 5mg/5ml oral suspension	Enalapril maleate
ACE/ARB	196	60791020	Enalapril 5mg tablets	Enalapril maleate
ACE/ARB	34712	63374020	Enalapril 20mg tablets (Kent Pharmaceuticals Ltd)	Enalapril maleate
ACE/ARB	35794	60325020	Enalapril 5mg tablets (A A H Pharmaceuticals Ltd)	Enalapril maleate
ACE/ARB	50863	19819020	Enalapril 5mg/5ml oral solution (Drug Tariff Special Order)	Enalapril maleate
ACE/ARB	64877	61779020	Enalapril 2.5mg tablets (Dexcel-Pharma Ltd)	Enalapril maleate
ACE/ARB	11197	86080020	Innovace melt 5mg Wafer (Merck Sharp & Dohme Ltd)	Enalapril Maleate
ACE/ARB	68496	63371020	Enalapril 10mg tablets (Kent Pharmaceuticals Ltd)	Enalapril maleate
ACE/ARB	29530	86079020	Innovace melt 2.5mg Wafer (Merck Sharp & Dohme Ltd)	Enalapril Maleate
ACE/ARB	43411	61356020	Enalapril 5mg tablets (Sandoz Ltd)	Enalapril maleate
ACE/ARB	42894	61262020	Enalapril 10mg tablets (Teva UK Ltd)	Enalapril maleate
ACE/ARB	24041	77943020	Enalapril 20mg wafer	Enalapril Maleate
ACE/ARB	1904	60796020	Enalapril 20mg tablets	Enalapril maleate
ACE/ARB	8830	55121020	Innovace 10mg tablets (Merck Sharp & Dohme Ltd)	Enalapril maleate
ACE/ARB	33057	75030020	Ednyt 5mg Tablet (Dominion Pharma)	Enalapril maleate
ACE/ARB	448	60790020	Enalapril 2.5mg tablets	Enalapril maleate
ACE/ARB	28127	61260020	Enalapril 2.5mg tablets (Teva UK Ltd)	Enalapril maleate
ACE/ARB	31716	61347020	Enalapril 20mg tablets (Actavis UK Ltd)	Enalapril maleate
ACE/ARB	37080	94154020	Enalapril 5mg/5ml oral solution	Enalapril maleate
ACE/ARB	66895	19803020	Enalapril 10mg/5ml oral suspension	Enalapril maleate
ACE/ARB	42902	61266020	Enalapril 20mg tablets (Teva UK Ltd)	Enalapril maleate
ACE/ARB	52882	40203020	Enalapril 5mg/5ml oral suspension sugar free	Enalapril maleate
ACE/ARB	8800	55120020	Innovace 5mg tablets (Merck Sharp & Dohme Ltd)	Enalapril maleate
ACE/ARB	63322	71478020	Enalapril 10mg tablets (Almus Pharmaceuticals Ltd)	Enalapril maleate
ACE/ARB	44657	75029020	Ednyt 2.5mg Tablet (Dominion Pharma)	Enalapril maleate
ACE/ARB	57378	30788020	Enalapril 2mg/5ml oral suspension	Enalapril maleate
ACE/ARB	1299	60792020	Enalapril 10mg tablets	Enalapril maleate
ACE/ARB	64062	30780020	Enalapril 1mg/5ml oral suspension	Enalapril maleate
ACE/ARB	15085	58452020	Innovace Titration pack (Merck Sharp & Dohme Ltd)	Enalapril Maleate
ACE/ARB	19208	61344020	Enalapril 10mg tablets (Actavis UK Ltd)	Enalapril maleate
ACE/ARB	57882	19854020	Enalapril 2.5mg/5ml oral suspension	Enalapril maleate
ACE/ARB	34952	61298020	Enalapril 10mg tablets (Mylan)	Enalapril maleate
ACE/ARB	36753	75031020	Ednyt 10mg Tablet (Dominion Pharma)	Enalapril maleate
ACE/ARB	53719	1427020	Enalapril 20mg tablets (Alliance Healthcare (Distribution) Ltd)	Enalapril maleate
ACE/ARB	33078	60335020	Enalapril 20mg tablets (A A H Pharmaceuticals Ltd)	Enalapril maleate
ACE/ARB	50780	30786020	Enalapril 2mg/5ml oral solution	Enalapril maleate
ACE/ARB	42723	73041020	Pralenal 5 tablets (Opus Pharmaceuticals Ltd)	Enalapril maleate
ACE/ARB	42901	61261020	Enalapril 5mg tablets (Teva UK Ltd)	Enalapril maleate
ACE/ARB	50334	19817020	Enalapril 4mg/5ml oral suspension	Enalapril maleate
ACE/ARB	55903	61781020	Enalapril 10mg tablets (Dexcel-Pharma Ltd)	Enalapril maleate
ACE/ARB	41746	61357020	Enalapril 10mg tablets (Sandoz Ltd)	Enalapril maleate
ACE/ARB	59996	1435020	Enalapril 20mg tablets (Milpharm Ltd)	Enalapril maleate
ACE/ARB	58751	19799020	Enalapril 1.25mg/5ml oral suspension	Enalapril maleate
ACE/ARB	13755	77942020	Enalapril 10mg wafer	Enalapril Maleate
ACE/ARB	13589	74175020	Staril 20mg tablets (Bristol-Myers Squibb Pharmaceuticals Ltd)	Fosinopril sodium
ACE/ARB	633	74178020	Fosinopril 10mg tablets	Fosinopril sodium
ACE/ARB	67307	1602020	Staril 20mg tablets (Dowelhurst Ltd)	Fosinopril sodium
ACE/ARB	4571	74174020	Staril 10mg tablets (Bristol-Myers Squibb Pharmaceuticals Ltd)	Fosinopril sodium
ACE/ARB	5861	74179020	Fosinopril 20mg tablets	Fosinopril sodium
ACE/ARB	6408	81266020	Tanatril 5mg tablets (Mitsubishi Tanabe Pharma Europe Ltd)	Imidapril hydrochloride
ACE/ARB	12815	81267020	Tanatril 10mg tablets (Mitsubishi Tanabe Pharma Europe Ltd)	Imidapril hydrochloride
ACE/ARB	16924	81181020	Imidapril 5mg tablets	Imidapril hydrochloride
ACE/ARB	18219	81183020	Imidapril 20mg tablets	Imidapril hydrochloride
ACE/ARB	32560	81268020	Tanatril 20mg tablets (Mitsubishi Tanabe Pharma Europe Ltd)	Imidapril hydrochloride
ACE/ARB	12858	81182020	Imidapril 10mg tablets	Imidapril hydrochloride
ACE/ARB	33977	65098020	Lisinopril 10mg tablets (Mylan)	Lisinopril
ACE/ARB	45337	65231020	Lisinopril 5mg tablets (Actavis UK Ltd)	Lisinopril
ACE/ARB	56505	1458020	Zestril 5mg tablets (Lexon (UK) Ltd)	Lisinopril
ACE/ARB	58294	1461020	Lisinopril 5mg tablets (Accord Healthcare Ltd)	Lisinopril
ACE/ARB	46975	65137020	Lisinopril 5mg tablets (Sandoz Ltd)	Lisinopril
ACE/ARB	30921	64809020	Lisinopril 2.5mg tablets (Teva UK Ltd)	Lisinopril
ACE/ARB	56510	1481020	Zestril 20mg tablets (Sigma Pharmaceuticals Plc)	Lisinopril
ACE/ARB	68094	1456020	Lisinopril 5mg tablets (Sigma Pharmaceuticals Plc)	Lisinopril
ACE/ARB	69074	1479020	Lisinopril 20mg tablets (Relonchem Ltd)	Lisinopril
ACE/ARB	43413	65206020	Lisinopril 20mg tablets (A A H Pharmaceuticals Ltd)	Lisinopril
ACE/ARB	8268	68567020	Zestril 20mg tablets (AstraZeneca UK Ltd)	Lisinopril
ACE/ARB	3720	68562020	Zestril 2.5mg tablets (AstraZeneca UK Ltd)	Lisinopril
ACE/ARB	41573	65180020	Lisopress 10mg tablets (Teva UK Ltd)	Lisinopril
ACE/ARB	69269	14473021	Lisinopril 20mg tablets (Waymade Healthcare Plc)	Lisinopril
ACE/ARB	43416	65202020	Lisinopril 10mg tablets (A A H Pharmaceuticals Ltd)	Lisinopril
ACE/ARB	12313	68559020	Carace 20mg tablets (Bristol-Myers Squibb Pharmaceuticals Ltd)	Lisinopril
ACE/ARB	59111	1473020	Lisinopril 20mg tablets (Alliance Healthcare (Distribution) Ltd)	Lisinopril
ACE/ARB	55896	65227020	Lisinopril 2.5mg tablets (Actavis UK Ltd)	Lisinopril
ACE/ARB	45816	71542020	Lisinopril 5mg tablets (Almus Pharmaceuticals Ltd)	Lisinopril
ACE/ARB	65985	23676021	Lisinopril 2.5mg tablets (DE Pharmaceuticals)	Lisinopril
ACE/ARB	65416	29672021	Lisinopril 5mg tablets (Lupin (Europe) Ltd)	Lisinopril
ACE/ARB	41522	65183020	Lisopress 20mg tablets (Teva UK Ltd)	Lisinopril
ACE/ARB	43566	65134020	Lisinopril 2.5mg tablets (Sandoz Ltd)	Lisinopril
ACE/ARB	43418	65199020	Lisinopril 5mg tablets (A A H Pharmaceuticals Ltd)	Lisinopril
ACE/ARB	14387	68555020	Carace 5mg tablets (Bristol-Myers Squibb Pharmaceuticals Ltd)	Lisinopril
ACE/ARB	19198	64822020	Lisinopril 20mg tablets (Teva UK Ltd)	Lisinopril
ACE/ARB	20975	90115020	Lisinopril 7.5mg/5ml oral suspension	Lisinopril
ACE/ARB	65	68572020	Lisinopril 10mg tablets	Lisinopril
ACE/ARB	58461	1437020	Lisinopril 2.5mg tablets (Kent Pharmaceuticals Ltd)	Lisinopril
ACE/ARB	11987	88326020	Lisinopril 5mg/5ml oral solution	Lisinopril
ACE/ARB	54288	69238020	Lisinopril 10mg tablets (Arrow Generics Ltd)	Lisinopril
ACE/ARB	6807	68563020	Zestril 5mg tablets (AstraZeneca UK Ltd)	Lisinopril
ACE/ARB	60010	1462020	Lisinopril 10mg tablets (Kent Pharmaceuticals Ltd)	Lisinopril
ACE/ARB	45300	65236020	Lisinopril 10mg tablets (Actavis UK Ltd)	Lisinopril
ACE/ARB	58258	20373020	Lisinopril 2.5mg/5ml oral suspension	Lisinopril
ACE/ARB	65102	1469020	Lisinopril 10mg tablets (Sigma Pharmaceuticals Plc)	Lisinopril
ACE/ARB	67075	53285021	Lisinopril 2.5mg tablets (Mawdsley-Brooks & Company Ltd)	Lisinopril
ACE/ARB	67194	1445020	Lisinopril 2.5mg tablets (Bristol Laboratories Ltd)	Lisinopril
ACE/ARB	6806	68564020	Zestril 10mg tablets (AstraZeneca UK Ltd)	Lisinopril
ACE/ARB	55639	1472020	Lisinopril 10mg tablets (Accord Healthcare Ltd)	Lisinopril
ACE/ARB	51433	66292020	Lisinopril 20mg tablets (Tillomed Laboratories Ltd)	Lisinopril
ACE/ARB	47159	71545020	Lisinopril 10mg tablets (Almus Pharmaceuticals Ltd)	Lisinopril
ACE/ARB	65536	1436020	Lisinopril 2.5mg tablets (Alliance Healthcare (Distribution) Ltd)	Lisinopril
ACE/ARB	56279	20371020	Lisinopril 2.5mg/5ml oral solution	Lisinopril
ACE/ARB	34799	65220020	Lisinopril 20mg tablets (Zentiva)	Lisinopril
ACE/ARB	59109	66285020	Lisinopril 5mg tablets (Tillomed Laboratories Ltd)	Lisinopril
ACE/ARB	41538	65173020	Lisopress 2.5mg tablets (Teva UK Ltd)	Lisinopril
ACE/ARB	63559	1474020	Lisinopril 20mg tablets (Kent Pharmaceuticals Ltd)	Lisinopril
ACE/ARB	57048	65217020	Lisinopril 10mg tablets (Zentiva)	Lisinopril
ACE/ARB	41532	65176020	Lisopress 5mg tablets (Teva UK Ltd)	Lisinopril
ACE/ARB	58863	1471020	Lisinopril 10mg tablets (Phoenix Healthcare Distribution Ltd)	Lisinopril
ACE/ARB	58871	14472021	Lisinopril 10mg tablets (Waymade Healthcare Plc)	Lisinopril
ACE/ARB	62564	20367020	Lisinopril 10mg/5ml oral solution	Lisinopril
ACE/ARB	78	68571020	Lisinopril 5mg tablets	Lisinopril
ACE/ARB	54037	1467020	Lisinopril 10mg tablets (Relonchem Ltd)	Lisinopril
ACE/ARB	16701	68556020	Carace 10mg tablets (Bristol-Myers Squibb Pharmaceuticals Ltd)	Lisinopril
ACE/ARB	60232	65214020	Lisinopril 5mg tablets (Zentiva)	Lisinopril
ACE/ARB	54512	91738020	Lisinopril Oral solution	Lisinopril
ACE/ARB	45324	65239020	Lisinopril 20mg tablets (Actavis UK Ltd)	Lisinopril
ACE/ARB	53551	1484020	Lisinopril 20mg tablets (Phoenix Healthcare Distribution Ltd)	Lisinopril
ACE/ARB	34471	65081020	Lisinopril 5mg tablets (Mylan)	Lisinopril
ACE/ARB	58451	71538020	Lisinopril 2.5mg tablets (Almus Pharmaceuticals Ltd)	Lisinopril
ACE/ARB	63824	20369020	Lisinopril 10mg/5ml oral suspension	Lisinopril
ACE/ARB	63030	23678021	Lisinopril 10mg tablets (DE Pharmaceuticals)	Lisinopril
ACE/ARB	66772	14470021	Lisinopril 2.5mg tablets (Waymade Healthcare Plc)	Lisinopril
ACE/ARB	34696	65102020	Lisinopril 20mg tablets (Mylan)	Lisinopril
ACE/ARB	10882	68554020	Carace 2.5mg tablets (Bristol-Myers Squibb Pharmaceuticals Ltd)	Lisinopril
ACE/ARB	55456	1448020	Lisinopril 5mg tablets (Alliance Healthcare (Distribution) Ltd)	Lisinopril
ACE/ARB	55002	1486020	Lisinopril 20mg tablets (Accord Healthcare Ltd)	Lisinopril
ACE/ARB	66558	23677021	Lisinopril 5mg tablets (DE Pharmaceuticals)	Lisinopril
ACE/ARB	37778	94657020	Lisinopril 5mg/5ml oral suspension	Lisinopril
ACE/ARB	61262	1483020	Lisinopril 20mg tablets (Bristol Laboratories Ltd)	Lisinopril
ACE/ARB	60309	1454020	Lisinopril 5mg tablets (Relonchem Ltd)	Lisinopril
ACE/ARB	54928	1470020	Lisinopril 10mg tablets (Bristol Laboratories Ltd)	Lisinopril
ACE/ARB	19223	64818020	Lisinopril 10mg tablets (Teva UK Ltd)	Lisinopril
ACE/ARB	64902	53969021	Lisinopril 5mg/5ml oral solution sugar free	Lisinopril
ACE/ARB	277	68570020	Lisinopril 2.5mg tablets	Lisinopril
ACE/ARB	58682	66939020	Lisinopril 2.5mg tablets (Mylan)	Lisinopril
ACE/ARB	70667	53286021	Lisinopril 5mg tablets (Mawdsley-Brooks & Company Ltd)	Lisinopril
ACE/ARB	53820	69229020	Lisinopril 5mg tablets (Arrow Generics Ltd)	Lisinopril
ACE/ARB	69	68575020	Lisinopril 20mg tablets	Lisinopril
ACE/ARB	46979	65143020	Lisinopril 20mg tablets (Sandoz Ltd)	Lisinopril
ACE/ARB	67795	71548020	Lisinopril 20mg tablets (Almus Pharmaceuticals Ltd)	Lisinopril
ACE/ARB	65983	29671021	Lisinopril 2.5mg tablets (Lupin (Europe) Ltd)	Lisinopril
ACE/ARB	66622	23679021	Lisinopril 20mg tablets (DE Pharmaceuticals)	Lisinopril
ACE/ARB	32597	65140020	Lisinopril 10mg tablets (Sandoz Ltd)	Lisinopril
ACE/ARB	43412	65196020	Lisinopril 2.5mg tablets (A A H Pharmaceuticals Ltd)	Lisinopril
ACE/ARB	68247	1457020	Lisinopril 5mg tablets (Bristol Laboratories Ltd)	Lisinopril
ACE/ARB	55588	1482020	Lisinopril 20mg tablets (Sigma Pharmaceuticals Plc)	Lisinopril
ACE/ARB	57588	1446020	Zestril 2.5mg tablets (Mawdsley-Brooks & Company Ltd)	Lisinopril
ACE/ARB	19204	64814020	Lisinopril 5mg tablets (Teva UK Ltd)	Lisinopril
ACE/ARB	54283	20380020	Lisinopril 5mg/5ml oral suspension (Special Order)	Lisinopril
ACE/ARB	53271	1463020	Lisinopril 10mg tablets (Alliance Healthcare (Distribution) Ltd)	Lisinopril
ACE/ARB	52088	1459020	Lisinopril 5mg tablets (Phoenix Healthcare Distribution Ltd)	Lisinopril
ACE/ARB	60097	65209020	Lisinopril 2.5mg tablets (Zentiva)	Lisinopril
ACE/ARB	15121	80674020	Moexipril 7.5mg tablets	Moexipril hydrochloride
ACE/ARB	17120	80675020	Moexipril 15mg tablets	Moexipril hydrochloride
ACE/ARB	28725	80672020	Perdix 15mg tablets (UCB Pharma Ltd)	Moexipril hydrochloride
ACE/ARB	28724	80671020	Perdix 7.5mg tablets (UCB Pharma Ltd)	Moexipril hydrochloride
ACE/ARB	51807	38770020	Coversyl Arginine 5mg tablets (DE Pharmaceuticals)	Perindopril arginine
ACE/ARB	37930	94699020	Perindopril arginine 5mg tablets	Perindopril arginine
ACE/ARB	37971	94701020	Perindopril arginine 10mg tablets	Perindopril arginine
ACE/ARB	38034	94703020	Coversyl Arginine 2.5mg tablets (Servier Laboratories Ltd)	Perindopril arginine
ACE/ARB	50347	34964020	Coversyl Arginine 5mg tablets (Waymade Healthcare Plc)	Perindopril arginine
ACE/ARB	37964	94697020	Perindopril arginine 2.5mg tablets	Perindopril arginine
ACE/ARB	38026	94707020	Coversyl Arginine 10mg tablets (Servier Laboratories Ltd)	Perindopril arginine
ACE/ARB	37965	94705020	Coversyl Arginine 5mg tablets (Servier Laboratories Ltd)	Perindopril arginine
ACE/ARB	48214	76375020	Perindopril erbumine 4mg tablets (Actavis UK Ltd)	Perindopril erbumine
ACE/ARB	59972	1543020	Perindopril erbumine 2mg tablets (Alliance Healthcare (Distribution) Ltd)	Perindopril erbumine
ACE/ARB	11983	90557020	Perindopril erbumine 4mg/5ml oral suspension	Perindopril erbumine
ACE/ARB	5800	72569020	Coversyl 4mg tablets (Servier Laboratories Ltd)	Perindopril erbumine
ACE/ARB	61270	45151020	Perindopril erbumine 4mg tablets (Accord Healthcare Ltd)	Perindopril erbumine
ACE/ARB	14960	83699020	Coversyl 8mg tablets (Servier Laboratories Ltd)	Perindopril erbumine
ACE/ARB	65273	76557020	Perindopril erbumine 4mg tablets (Mylan)	Perindopril erbumine
ACE/ARB	54986	35397020	Perindopril erbumine 8mg/5ml oral suspension	Perindopril erbumine
ACE/ARB	59770	15619021	Perindopril erbumine 4mg tablets (Aurobindo Pharma Ltd)	Perindopril erbumine
ACE/ARB	43012	91957020	Perindopril erbumine oral solution	Perindopril Erbumine
ACE/ARB	67269	1540020	Coversyl 2mg tablets (Waymade Healthcare Plc)	Perindopril erbumine
ACE/ARB	48049	76554020	Perindopril erbumine 2mg tablets (Mylan)	Perindopril erbumine
ACE/ARB	58874	1550020	Perindopril erbumine 2mg tablets (Somex Pharma)	Perindopril erbumine
ACE/ARB	53058	40612020	Perindopril erbumine 8mg tablets (Sandoz Ltd)	Perindopril erbumine
ACE/ARB	58843	1542020	Perindopril erbumine 2mg tablets (Kent Pharmaceuticals Ltd)	Perindopril erbumine
ACE/ARB	56162	1556020	Perindopril erbumine 4mg tablets (Consilient Health Ltd)	Perindopril erbumine
ACE/ARB	71004	45210020	Perindopril erbumine 8mg tablets (Accord Healthcare Ltd)	Perindopril erbumine
ACE/ARB	45938	75040020	Perindopril erbumine 8mg tablets (Teva UK Ltd)	Perindopril erbumine
ACE/ARB	56473	1546020	Perindopril erbumine 2mg tablets (Sigma Pharmaceuticals Plc)	Perindopril erbumine
ACE/ARB	56472	1554020	Perindopril erbumine 4mg tablets (Kent Pharmaceuticals Ltd)	Perindopril erbumine
ACE/ARB	60065	1557020	Perindopril erbumine 4mg tablets (Sigma Pharmaceuticals Plc)	Perindopril erbumine
ACE/ARB	97	72573020	Perindopril erbumine 4mg tablets	Perindopril erbumine
ACE/ARB	38510	74776020	Perindopril erbumine 4mg tablets (Apotex UK Ltd)	Perindopril erbumine
ACE/ARB	57801	1558020	Perindopril erbumine 4mg tablets (Glenmark Pharmaceuticals Europe Ltd)	Perindopril erbumine
ACE/ARB	5612	72568020	Coversyl 2mg tablets (Servier Laboratories Ltd)	Perindopril erbumine
ACE/ARB	56516	75649020	Perindopril erbumine 2mg tablets (Sandoz Ltd)	Perindopril erbumine
ACE/ARB	6078	79311020	Perindopril erbumine 8mg tablets	Perindopril erbumine
ACE/ARB	49491	1545020	Perindopril erbumine 2mg tablets (Consilient Health Ltd)	Perindopril erbumine
ACE/ARB	57701	76377020	Perindopril erbumine 8mg tablets (Actavis UK Ltd)	Perindopril erbumine
ACE/ARB	68021	1555020	Perindopril erbumine 4mg tablets (Alliance Healthcare (Distribution) Ltd)	Perindopril erbumine
ACE/ARB	61693	15724021	Perindopril erbumine 8mg tablets (Aurobindo Pharma Ltd)	Perindopril erbumine
ACE/ARB	33095	73493020	Perindopril erbumine 4mg tablets (A A H Pharmaceuticals Ltd)	Perindopril erbumine
ACE/ARB	35731	73496020	Perindopril erbumine 8mg tablets (A A H Pharmaceuticals Ltd)	Perindopril erbumine
ACE/ARB	54733	9855020	Perindopril erbumine 8mg tablets (Consilient Health Ltd)	Perindopril erbumine
ACE/ARB	59790	39906020	Perindopril erbumine 8mg tablets (Accord Healthcare Ltd)	Perindopril erbumine
ACE/ARB	69016	53703021	Perindopril erbumine 8mg tablets (DE Pharmaceuticals)	Perindopril erbumine
ACE/ARB	54899	75033020	Perindopril erbumine 2mg tablets (Teva UK Ltd)	Perindopril erbumine
ACE/ARB	50402	74621020	Perindopril 2mg Tablet (Servier Laboratories Ltd)	Perindopril erbumine
ACE/ARB	48180	75652020	Perindopril erbumine 4mg tablets (Sandoz Ltd)	Perindopril erbumine
ACE/ARB	593	72572020	Perindopril erbumine 2mg tablets	Perindopril erbumine
ACE/ARB	54942	76559020	Perindopril erbumine 8mg tablets (Mylan)	Perindopril erbumine
ACE/ARB	64602	47141020	Perindopril erbumine 2mg tablets (Waymade Healthcare Plc)	Perindopril erbumine
ACE/ARB	43813	76373020	Perindopril erbumine 2mg tablets (Actavis UK Ltd)	Perindopril erbumine
ACE/ARB	67789	45150020	Perindopril erbumine 2mg tablets (Accord Healthcare Ltd)	Perindopril erbumine
ACE/ARB	70916	9854020	Perindopril erbumine 8mg tablets (Glenmark Pharmaceuticals Europe Ltd)	Perindopril erbumine
ACE/ARB	68381	57259021	Perindopril erbumine 4mg tablets (Mawdsley-Brooks & Company Ltd)	Perindopril erbumine
ACE/ARB	56508	1552020	Coversyl 4mg tablets (Dowelhurst Ltd)	Perindopril erbumine
ACE/ARB	56506	1541020	Coversyl 2mg tablets (Dowelhurst Ltd)	Perindopril erbumine
ACE/ARB	66060	53294021	Perindopril erbumine 2mg tablets (DE Pharmaceuticals)	Perindopril erbumine
ACE/ARB	45319	73490020	Perindopril erbumine 2mg tablets (A A H Pharmaceuticals Ltd)	Perindopril erbumine
ACE/ARB	61117	20667021	Perindopril erbumine 4mg/5ml oral solution	Perindopril erbumine
ACE/ARB	70917	1547020	Perindopril erbumine 2mg tablets (Glenmark Pharmaceuticals Europe Ltd)	Perindopril erbumine
ACE/ARB	38285	75036020	Perindopril erbumine 4mg tablets (Teva UK Ltd)	Perindopril erbumine
ACE/ARB	68759	15618021	Perindopril erbumine 2mg tablets (Aurobindo Pharma Ltd)	Perindopril erbumine
ACE/ARB	57333	47942020	Perindopril tosilate 5mg tablets	Perindopril tosilate
ACE/ARB	56079	47933020	Perindopril tosilate 10mg tablets	Perindopril tosilate
ACE/ARB	57944	47936020	Perindopril tosilate 2.5mg tablets	Perindopril tosilate
ACE/ARB	15096	75604020	Accupro 40mg tablets (Pfizer Ltd)	Quinapril hydrochloride
ACE/ARB	14478	69845020	Accupro 20mg tablets (Pfizer Ltd)	Quinapril hydrochloride
ACE/ARB	6765	69848020	Quinapril 5mg tablets	Quinapril hydrochloride
ACE/ARB	7314	69843020	Accupro 5mg tablets (Pfizer Ltd)	Quinapril hydrochloride
ACE/ARB	61292	68165020	Quinapril 40mg tablets (Mylan)	Quinapril hydrochloride
ACE/ARB	14477	69844020	Accupro 10mg tablets (Pfizer Ltd)	Quinapril hydrochloride
ACE/ARB	3929	69849020	Quinapril 10mg tablets	Quinapril hydrochloride
ACE/ARB	46365	89048020	Quinil 20mg tablets (Tillomed Laboratories Ltd)	Quinapril hydrochloride
ACE/ARB	42285	89050020	Quinil 40mg tablets (Tillomed Laboratories Ltd)	Quinapril hydrochloride
ACE/ARB	38854	95370020	Quinapril 20mg/5ml oral solution	Quinapril Hydrochloride
ACE/ARB	5159	69850020	Quinapril 20mg tablets	Quinapril hydrochloride
ACE/ARB	40355	89044020	Quinil 5mg tablets (Tillomed Laboratories Ltd)	Quinapril hydrochloride
ACE/ARB	9731	75607020	Quinapril 40mg tablets	Quinapril hydrochloride
ACE/ARB	38899	89046020	Quinil 10mg tablets (Tillomed Laboratories Ltd)	Quinapril hydrochloride
ACE/ARB	28586	88107020	Lopace 5mg capsules (Discovery Pharmaceuticals)	Ramipril
ACE/ARB	52407	1585020	Ramipril 10mg capsules (Kent Pharmaceuticals Ltd)	Ramipril
ACE/ARB	709	72675020	Ramipril 2.5mg capsules	Ramipril
ACE/ARB	57658	67312020	Ramipril 1.25mg tablets (A A H Pharmaceuticals Ltd)	Ramipril
ACE/ARB	68372	73473020	Ramipril 5mg tablets (Actavis UK Ltd)	Ramipril
ACE/ARB	47998	68974020	Ramipril 2.5mg capsules (Actavis UK Ltd)	Ramipril
ACE/ARB	52399	1564020	Ramipril 1.25mg capsules (Kent Pharmaceuticals Ltd)	Ramipril
ACE/ARB	65936	53298021	Ramipril 5mg capsules (DE Pharmaceuticals)	Ramipril
ACE/ARB	38308	95107020	Ramipril 2.5/5mg/10mg tablet	Ramipril
ACE/ARB	34382	67206020	Ramipril 5mg capsules (Zentiva)	Ramipril
ACE/ARB	654	80174020	Ramipril 2.5/5mg/10mg capsule	Ramipril
ACE/ARB	45264	68971020	Ramipril 1.25mg capsules (Actavis UK Ltd)	Ramipril
ACE/ARB	34652	67455020	Ramipril 5mg Capsule (Sovereign Medical Ltd)	Ramipril
ACE/ARB	29627	88105020	Lopace 2.5mg capsules (Discovery Pharmaceuticals)	Ramipril
ACE/ARB	5275	72670020	Tritace 2.5mg capsules (Sanofi)	Ramipril
ACE/ARB	49164	1588020	Ramipril 10mg capsules (Actavis UK Ltd)	Ramipril
ACE/ARB	61694	67907020	Ramipril 5mg tablets (Zentiva)	Ramipril
ACE/ARB	11937	90539020	Ramipril 2.5mg/5ml oral suspension	Ramipril
ACE/ARB	56855	1590020	Ramipril 10mg capsules (Sigma Pharmaceuticals Plc)	Ramipril
ACE/ARB	61499	73468020	Ramipril 2.5mg tablets (Actavis UK Ltd)	Ramipril
ACE/ARB	9915	87063020	Tritace 10mg tablets (Sanofi)	Ramipril
ACE/ARB	34390	67186020	Ramipril 5mg capsules (Genus Pharmaceuticals Ltd)	Ramipril
ACE/ARB	34412	67140020	Ramipril 5mg capsules (Teva UK Ltd)	Ramipril
ACE/ARB	56129	1578020	Ramipril 5mg capsules (Kent Pharmaceuticals Ltd)	Ramipril
ACE/ARB	34657	67209020	Ramipril 10mg capsules (Zentiva)	Ramipril
ACE/ARB	42081	87446020	Tritace 1.25mg Tablet (Sterwin Medicines)	Ramipril
ACE/ARB	57073	47143020	Ramipril 1.25mg capsules (Waymade Healthcare Plc)	Ramipril
ACE/ARB	70709	10702020	Ramipril 10mg tablets (Actavis UK Ltd)	Ramipril
ACE/ARB	54620	1575020	Ramipril 2.5mg capsules (Sigma Pharmaceuticals Plc)	Ramipril
ACE/ARB	67741	73266020	Ramipril 1.25mg capsules (Almus Pharmaceuticals Ltd)	Ramipril
ACE/ARB	56148	10683020	Ramipril 1.25mg tablets (Kent Pharmaceuticals Ltd)	Ramipril
ACE/ARB	52197	1582020	Ramipril 5mg capsules (Sigma Pharmaceuticals Plc)	Ramipril
ACE/ARB	6364	87059020	Tritace 2.5mg tablets (Sanofi)	Ramipril
ACE/ARB	9646	72669020	Tritace 1.25mg capsules (Aventis Pharma)	Ramipril
ACE/ARB	55299	67297020	Ramipril 1.25mg capsules (A A H Pharmaceuticals Ltd)	Ramipril
ACE/ARB	82	70737020	Ramipril 10mg capsules	Ramipril
ACE/ARB	59603	1577020	Ramipril 2.5mg capsules (Phoenix Healthcare Distribution Ltd)	Ramipril
ACE/ARB	147	72674020	Ramipril 1.25mg capsules	Ramipril
ACE/ARB	66669	53299021	Ramipril 10mg capsules (DE Pharmaceuticals)	Ramipril
ACE/ARB	34732	67512020	Ramipril 2.5mg Capsule (Dexcel-Pharma Ltd)	Ramipril
ACE/ARB	34540	67305020	Ramipril 5mg capsules (A A H Pharmaceuticals Ltd)	Ramipril
ACE/ARB	68480	57263021	Ramipril 10mg capsules (Mawdsley-Brooks & Company Ltd)	Ramipril
ACE/ARB	50509	20723020	Ramipril 10mg/5ml oral solution	Ramipril
ACE/ARB	9693	55352020	Tritace 10mg capsules (Sanofi)	Ramipril
ACE/ARB	57235	74497020	Ramipril 1.25mg tablets (Sandoz Ltd)	Ramipril
ACE/ARB	70072	57260021	Ramipril 1.25mg capsules (Mawdsley-Brooks & Company Ltd)	Ramipril
ACE/ARB	80	72676020	Ramipril 5mg capsules	Ramipril
ACE/ARB	34431	67203020	Ramipril 2.5mg capsules (Zentiva)	Ramipril
ACE/ARB	55798	47145020	Ramipril 5mg capsules (Waymade Healthcare Plc)	Ramipril
ACE/ARB	45554	99318020	Ramipril 5mg/5ml oral solution	Ramipril
ACE/ARB	34429	69439020	Ramipril 5mg capsules (Mylan)	Ramipril
ACE/ARB	33811	69974020	Ramipril 2.5mg capsules (Ranbaxy (UK) Ltd)	Ramipril
ACE/ARB	64055	47865020	Ramipril 2.5mg/5ml oral solution sugar free (Waymade Healthcare Plc)	Ramipril
ACE/ARB	32857	67125020	Ramipril 1.25mg capsules (Teva UK Ltd)	Ramipril
ACE/ARB	66162	67147020	Ramipril 10mg tablets (Teva UK Ltd)	Ramipril
ACE/ARB	51701	1583020	Ramipril 5mg capsules (Bristol Laboratories Ltd)	Ramipril
ACE/ARB	54298	70068020	Ramipril 2.5mg capsules (Arrow Generics Ltd)	Ramipril
ACE/ARB	56763	1592020	Ramipril 10mg capsules (Phoenix Healthcare Distribution Ltd)	Ramipril
ACE/ARB	54941	1579020	Ramipril 5mg capsules (Alliance Healthcare (Distribution) Ltd)	Ramipril
ACE/ARB	34357	67189020	Ramipril 10mg capsules (Genus Pharmaceuticals Ltd)	Ramipril
ACE/ARB	45340	68982020	Ramipril 10mg Capsule (Actavis UK Ltd)	Ramipril
ACE/ARB	5735	72671020	Tritace 5mg capsules (Sanofi)	Ramipril
ACE/ARB	34893	68264020	Ramipril 10mg Capsule (IVAX Pharmaceuticals UK Ltd)	Ramipril
ACE/ARB	65443	67465020	Ramipril 1.25mg Tablet (Sovereign Medical Ltd)	Ramipril
ACE/ARB	51714	1572020	Ramipril 2.5mg capsules (Alliance Healthcare (Distribution) Ltd)	Ramipril
ACE/ARB	63442	67132020	Ramipril 2.5mg tablets (Teva UK Ltd)	Ramipril
ACE/ARB	71068	39004020	Ramipril 2.5mg tablets (APC Pharmaceuticals & Chemicals (Europe) Ltd)	Ramipril
ACE/ARB	40384	67322020	Ramipril 10mg tablets (A A H Pharmaceuticals Ltd)	Ramipril
ACE/ARB	53621	1576020	Ramipril 2.5mg capsules (Bristol Laboratories Ltd)	Ramipril
ACE/ARB	62039	67901020	Ramipril 1.25mg tablets (Zentiva)	Ramipril
ACE/ARB	56704	1565020	Ramipril 1.25mg capsules (Alliance Healthcare (Distribution) Ltd)	Ramipril
ACE/ARB	6288	87053020	Ramipril 5mg tablets	Ramipril
ACE/ARB	61339	73446020	Ramipril 10mg capsules (Almus Pharmaceuticals Ltd)	Ramipril
ACE/ARB	62918	39779020	Ramipril 2.5mg/5ml oral solution	Ramipril
ACE/ARB	34567	69436020	Ramipril 2.5mg capsules (Mylan)	Ramipril
ACE/ARB	34528	67301020	Ramipril 2.5mg capsules (A A H Pharmaceuticals Ltd)	Ramipril
ACE/ARB	34589	67515020	Ramipril 5mg Capsule (Dexcel-Pharma Ltd)	Ramipril
ACE/ARB	53612	10700020	Ramipril 10mg tablets (Alliance Healthcare (Distribution) Ltd)	Ramipril
ACE/ARB	47021	475021	Ramipril 2.5mg/5ml oral solution sugar free	Ramipril
ACE/ARB	71040	39748020	Ramipril 5mg tablets (Pfizer Ltd)	Ramipril
ACE/ARB	62036	47656020	Ramipril 5mg tablets (Waymade Healthcare Plc)	Ramipril
ACE/ARB	57864	10698020	Ramipril 5mg tablets (Sigma Pharmaceuticals Plc)	Ramipril
ACE/ARB	756	87055020	Ramipril 10mg tablets	Ramipril
ACE/ARB	34943	67309020	Ramipril 10mg capsules (A A H Pharmaceuticals Ltd)	Ramipril
ACE/ARB	61067	73443020	Ramipril 5mg capsules (Almus Pharmaceuticals Ltd)	Ramipril
ACE/ARB	56038	39749020	Ramipril 10mg tablets (Pfizer Ltd)	Ramipril
ACE/ARB	34432	67183020	Ramipril 2.5mg capsules (Genus Pharmaceuticals Ltd)	Ramipril
ACE/ARB	65599	67319020	Ramipril 5mg tablets (A A H Pharmaceuticals Ltd)	Ramipril
ACE/ARB	35007	91818020	Ramipril 10mg/5ml oral suspension	Ramipril
ACE/ARB	57346	47146020	Ramipril 10mg capsules (Waymade Healthcare Plc)	Ramipril
ACE/ARB	34877	67460020	Ramipril 10mg Capsule (Sovereign Medical Ltd)	Ramipril
ACE/ARB	69288	66003021	Ramipril 10mg capsules (Brown & Burk UK Ltd)	Ramipril
ACE/ARB	34539	67175020	Ramipril 5mg capsules (Sandoz Ltd)	Ramipril
ACE/ARB	34698	67770020	Ramipril 1.25mg capsules (Zentiva)	Ramipril
ACE/ARB	34583	67518020	Ramipril 10mg Capsule (Dexcel-Pharma Ltd)	Ramipril
ACE/ARB	34490	67129020	Ramipril 2.5mg capsules (Teva UK Ltd)	Ramipril
ACE/ARB	63010	10706020	Ramipril 10mg tablets (Phoenix Healthcare Distribution Ltd)	Ramipril
ACE/ARB	34505	67170020	Ramipril 2.5mg capsules (Sandoz Ltd)	Ramipril
ACE/ARB	46890	477021	Ramipril 5mg/5ml oral suspension	Ramipril
ACE/ARB	61985	67121020	Ramipril 1.25mg tablets (Teva UK Ltd)	Ramipril
ACE/ARB	68192	66002021	Ramipril 5mg capsules (Brown & Burk UK Ltd)	Ramipril
ACE/ARB	32934	88109020	Lopace 10mg capsules (Discovery Pharmaceuticals)	Ramipril
ACE/ARB	33894	67144020	Ramipril 10mg capsules (Teva UK Ltd)	Ramipril
ACE/ARB	761	87049020	Ramipril 1.25mg tablets	Ramipril
ACE/ARB	34651	69441020	Ramipril 10mg capsules (Mylan)	Ramipril
ACE/ARB	59557	1571020	Ramipril 2.5mg capsules (Kent Pharmaceuticals Ltd)	Ramipril
ACE/ARB	56013	47144020	Ramipril 2.5mg capsules (Waymade Healthcare Plc)	Ramipril
ACE/ARB	62958	67136020	Ramipril 5mg tablets (Teva UK Ltd)	Ramipril
ACE/ARB	48008	68978020	Ramipril 5mg capsules (Actavis UK Ltd)	Ramipril
ACE/ARB	56356	1586020	Ramipril 10mg capsules (Alliance Healthcare (Distribution) Ltd)	Ramipril
ACE/ARB	59788	1591020	Ramipril 10mg capsules (Bristol Laboratories Ltd)	Ramipril
ACE/ARB	71025	39003020	Ramipril 1.25mg tablets (APC Pharmaceuticals & Chemicals (Europe) Ltd)	Ramipril
ACE/ARB	48053	73269020	Ramipril 2.5mg capsules (Almus Pharmaceuticals Ltd)	Ramipril
ACE/ARB	67719	57262021	Ramipril 5mg capsules (Mawdsley-Brooks & Company Ltd)	Ramipril
ACE/ARB	60730	1584020	Ramipril 5mg capsules (Phoenix Healthcare Distribution Ltd)	Ramipril
ACE/ARB	39355	87452020	Tritace 10mg Tablet (Sterwin Medicines)	Ramipril
ACE/ARB	65749	44888021	Ramipril 5mg capsules (Ennogen Pharma Ltd)	Ramipril
ACE/ARB	6362	87061020	Tritace 5mg tablets (Sanofi)	Ramipril
ACE/ARB	6261	87057020	Tritace 1.25mg tablets (Sanofi)	Ramipril
ACE/ARB	6314	87051020	Ramipril 2.5mg tablets	Ramipril
ACE/ARB	34710	67179020	Ramipril 10mg capsules (Sandoz Ltd)	Ramipril
ACE/ARB	66329	91820020	Ramipril oral solution	Ramipril
ACE/ARB	56169	70076020	Ramipril 10mg capsules (Arrow Generics Ltd)	Ramipril
ACE/ARB	31810	68138020	Odrik 1mg capsules (Aventis Pharma)	Trandolapril
ACE/ARB	60757	75136020	Trandolapril 500microgram capsules (Teva UK Ltd)	Trandolapril
ACE/ARB	7419	69080020	Trandolapril 500microgram capsules	Trandolapril
ACE/ARB	16710	71438020	Gopten 500microgram capsules (Abbott Laboratories Ltd)	Trandolapril
ACE/ARB	29130	87608020	Gopten 4mg capsules (Abbott Laboratories Ltd)	Trandolapril
ACE/ARB	4103	69081020	Trandolapril 1mg capsules	Trandolapril
ACE/ARB	65389	1616020	Gopten 500microgram capsules (Waymade Healthcare Plc)	Trandolapril
ACE/ARB	9948	87606020	Trandolapril 4mg capsules	Trandolapril
ACE/ARB	54345	10867020	Trandolapril 4mg capsules (Arrow Generics Ltd)	Trandolapril
ACE/ARB	5047	69082020	Trandolapril 2mg capsules	Trandolapril
ACE/ARB	8025	71439020	Gopten 1mg capsules (Abbott Laboratories Ltd)	Trandolapril
ACE/ARB	28902	68139020	Odrik 2mg capsules (Aventis Pharma)	Trandolapril
ACE/ARB	65570	75295020	Trandolapril 4mg capsules (Teva UK Ltd)	Trandolapril
ACE/ARB	8026	71440020	Gopten 2mg capsules (Abbott Laboratories Ltd)	Trandolapril
ACE/ARB	66623	75170020	Trandolapril 2mg capsules (A A H Pharmaceuticals Ltd)	Trandolapril
ACE/ARB	31307	68137020	Odrik 500microgram capsules (Aventis Pharma)	Trandolapril
ACE/ARB	56606	41454020	Azilsartan medoxomil 40mg tablets	Azilsartan medoxomil
ACE/ARB	51897	41680020	Edarbi 20mg tablets (Takeda UK Ltd)	Azilsartan medoxomil
ACE/ARB	51368	41456020	Azilsartan medoxomil 80mg tablets	Azilsartan medoxomil
ACE/ARB	531	81324020	Candesartan 4mg tablets	Candesartan cilexetil
ACE/ARB	54414	41324020	Candesartan 16mg tablets (Consilient Health Ltd)	Candesartan cilexetil
ACE/ARB	67929	66007021	Candesartan 16mg tablets (Tillomed Laboratories Ltd)	Candesartan cilexetil
ACE/ARB	57026	47162020	Candesartan 8mg tablets (Waymade Healthcare Plc)	Candesartan cilexetil
ACE/ARB	529	81323020	Candesartan 2mg tablets	Candesartan cilexetil
ACE/ARB	4685	79054020	Amias 4mg tablets (Takeda UK Ltd)	Candesartan cilexetil
ACE/ARB	31072	88790020	Amias 32mg tablets (Takeda UK Ltd)	Candesartan cilexetil
ACE/ARB	51117	1771020	Candesartan 8mg tablets (DE Pharmaceuticals)	Candesartan cilexetil
ACE/ARB	51647	1764020	Candesartan 4mg tablets (Mawdsley-Brooks & Company Ltd)	Candesartan cilexetil
ACE/ARB	5013	79055020	Amias 8mg tablets (Takeda UK Ltd)	Candesartan cilexetil
ACE/ARB	68718	41312020	Candesartan 4mg tablets (A A H Pharmaceuticals Ltd)	Candesartan cilexetil
ACE/ARB	66958	25451021	Candesartan 8mg tablets (Sandoz Ltd)	Candesartan cilexetil
ACE/ARB	5117	86113020	Amias 16mg tablets (Takeda UK Ltd)	Candesartan cilexetil
ACE/ARB	57977	41323020	Candesartan 16mg tablets (Alliance Healthcare (Distribution) Ltd)	Candesartan cilexetil
ACE/ARB	70805	73863021	Candesartan 8mg tablets (Crescent Pharma Ltd)	Candesartan cilexetil
ACE/ARB	69802	70618021	Candesartan 4mg tablets (Mylan)	Candesartan cilexetil
ACE/ARB	68647	69013021	Candesartan 8mg tablets (Genesis Pharmaceuticals Ltd)	Candesartan cilexetil
ACE/ARB	65228	1781020	Candesartan 16mg tablets (Mawdsley-Brooks & Company Ltd)	Candesartan cilexetil
ACE/ARB	64359	16671021	Candesartan 4mg tablets (DE Pharmaceuticals)	Candesartan cilexetil
ACE/ARB	57266	46326020	Candesartan 2mg tablets (Actavis UK Ltd)	Candesartan cilexetil
ACE/ARB	4155	79053020	Amias 2mg tablets (Takeda UK Ltd)	Candesartan cilexetil
ACE/ARB	4818	81325020	Candesartan 8mg tablets	Candesartan cilexetil
ACE/ARB	71080	42155020	Candesartan 4mg tablets (Zentiva)	Candesartan cilexetil
ACE/ARB	54326	41435020	Candesartan 32mg tablets (Teva UK Ltd)	Candesartan cilexetil
ACE/ARB	53680	41320020	Candesartan 16mg tablets (Teva UK Ltd)	Candesartan cilexetil
ACE/ARB	59690	41319020	Candesartan 8mg tablets (Consilient Health Ltd)	Candesartan cilexetil
ACE/ARB	65479	41308020	Candesartan 2mg tablets (A A H Pharmaceuticals Ltd)	Candesartan cilexetil
ACE/ARB	50185	41315020	Candesartan 8mg tablets (Teva UK Ltd)	Candesartan cilexetil
ACE/ARB	7043	88788020	Candesartan 32mg tablets	Candesartan cilexetil
ACE/ARB	53755	41310020	Candesartan 4mg tablets (Teva UK Ltd)	Candesartan cilexetil
ACE/ARB	59802	41901020	Candesartan 2mg tablets (Teva UK Ltd)	Candesartan cilexetil
ACE/ARB	68751	69014021	Candesartan 16mg tablets (Genesis Pharmaceuticals Ltd)	Candesartan cilexetil
ACE/ARB	62035	47163020	Candesartan 16mg tablets (Waymade Healthcare Plc)	Candesartan cilexetil
ACE/ARB	52208	41322020	Candesartan 16mg tablets (A A H Pharmaceuticals Ltd)	Candesartan cilexetil
ACE/ARB	57273	41316020	Candesartan 8mg tablets (Actavis UK Ltd)	Candesartan cilexetil
ACE/ARB	51519	41317020	Candesartan 8mg tablets (A A H Pharmaceuticals Ltd)	Candesartan cilexetil
ACE/ARB	4741	81321020	Candesartan 16mg tablets	Candesartan cilexetil
ACE/ARB	62140	25450021	Candesartan 4mg tablets (Sandoz Ltd)	Candesartan cilexetil
ACE/ARB	58646	41311020	Candesartan 4mg tablets (Actavis UK Ltd)	Candesartan cilexetil
ACE/ARB	52559	42156020	Candesartan 8mg tablets (Zentiva)	Candesartan cilexetil
ACE/ARB	66624	25452021	Candesartan 16mg tablets (Sandoz Ltd)	Candesartan cilexetil
ACE/ARB	70455	36604020	Candesartan 4mg/5ml oral suspension	Candesartan cilexetil
ACE/ARB	16371	84006020	Teveten 600mg tablets (Mylan)	Eprosartan mesilate
ACE/ARB	12836	84002020	Eprosartan 600mg tablets	Eprosartan mesilate
ACE/ARB	63337	44389020	Eprosartan 600mg tablets (A A H Pharmaceuticals Ltd)	Eprosartan mesilate
ACE/ARB	9745	84004020	Teveten 300mg tablets (Mylan)	Eprosartan mesilate
ACE/ARB	13123	84001020	Eprosartan 400mg tablets	Eprosartan mesilate
ACE/ARB	6939	84000020	Eprosartan 300mg tablets	Eprosartan mesilate
ACE/ARB	16285	84005020	Teveten 400mg tablets (Abbott Healthcare Products Ltd)	Eprosartan mesilate
ACE/ARB	70955	74725020	Irbesartan 300mg/5ml Oral suspension (Martindale Pharmaceuticals Ltd)	Irbesartan
ACE/ARB	7338	85709020	Aprovel 75mg tablets (Sanofi)	Irbesartan
ACE/ARB	63411	43824020	Irbesartan 300mg tablets (Alliance Healthcare (Distribution) Ltd)	Irbesartan
ACE/ARB	58201	44381020	Irbesartan 150mg tablets (Actavis UK Ltd)	Irbesartan
ACE/ARB	52972	1748020	Irbesartan 300mg tablets (Sigma Pharmaceuticals Plc)	Irbesartan
ACE/ARB	65065	44380020	Irbesartan 75mg tablets (A A H Pharmaceuticals Ltd)	Irbesartan
ACE/ARB	58108	44383020	Irbesartan 150mg tablets (A A H Pharmaceuticals Ltd)	Irbesartan
ACE/ARB	36939	94158020	Irbesartan 300mg/5ml oral suspension	Irbesartan
ACE/ARB	59393	47159020	Irbesartan 300mg tablets (Sandoz Ltd)	Irbesartan
ACE/ARB	1293	85706020	Irbesartan 150mg tablets	Irbesartan
ACE/ARB	71096	46324020	Irbesartan 150mg tablets (Dr Reddy's Laboratories (UK) Ltd)	Irbesartan
ACE/ARB	55017	45155020	Irbesartan 300mg tablets (Accord Healthcare Ltd)	Irbesartan
ACE/ARB	63385	45450020	Sabervel 75mg tablets (Aspire Pharma Ltd)	Irbesartan
ACE/ARB	60597	43819020	Irbesartan 150mg tablets (Teva UK Ltd)	Irbesartan
ACE/ARB	70431	31321021	Irbesartan 150mg tablets (Lupin (Europe) Ltd)	Irbesartan
ACE/ARB	61781	43823020	Irbesartan 300mg tablets (Teva UK Ltd)	Irbesartan
ACE/ARB	63717	23039021	Irbesartan 300mg tablets (DE Pharmaceuticals)	Irbesartan
ACE/ARB	62415	43822020	Irbesartan 300mg tablets (A A H Pharmaceuticals Ltd)	Irbesartan
ACE/ARB	2971	85707020	Irbesartan 300mg tablets	Irbesartan
ACE/ARB	71019	46323020	Irbesartan 75mg tablets (Dr Reddy's Laboratories (UK) Ltd)	Irbesartan
ACE/ARB	9196	85710020	Aprovel 150mg tablets (Sanofi)	Irbesartan
ACE/ARB	828	85705020	Irbesartan 75mg tablets	Irbesartan
ACE/ARB	11348	85711020	Aprovel 300mg tablets (Sanofi)	Irbesartan
ACE/ARB	41232	97245020	Cozaar 2.5mg/ml oral suspension (Merck Sharp & Dohme Ltd)	Losartan potassium
ACE/ARB	67902	40623020	Losartan 100mg tablets (Sandoz Ltd)	Losartan potassium
ACE/ARB	58274	1646020	Losartan 25mg tablets (Accord Healthcare Ltd)	Losartan potassium
ACE/ARB	58649	43813020	Losartan 25mg tablets (Bristol Laboratories Ltd)	Losartan potassium
ACE/ARB	54843	77349020	Losartan 50mg tablets (Dexcel-Pharma Ltd)	Losartan potassium
ACE/ARB	51601	77734020	Losartan 50mg tablets (Actavis UK Ltd)	Losartan potassium
ACE/ARB	61495	14777021	Losartan 25mg tablets (Aptil Pharma Ltd)	Losartan potassium
ACE/ARB	54057	77299020	Losartan 50mg tablets (Teva UK Ltd)	Losartan potassium
ACE/ARB	52658	36312020	Losartan 100mg/5ml oral suspension	Losartan potassium
ACE/ARB	65094	40516020	Losartan 50mg tablets (Sandoz Ltd)	Losartan potassium
ACE/ARB	52659	35425020	Losartan 50mg/5ml oral solution	Losartan potassium
ACE/ARB	68603	41900020	Losartan 50mg tablets (Wockhardt UK Ltd)	Losartan potassium
ACE/ARB	54404	77737020	Losartan 100mg tablets (Actavis UK Ltd)	Losartan potassium
ACE/ARB	69667	36310020	Losartan 100mg/5ml oral solution	Losartan potassium
ACE/ARB	59271	40515020	Losartan 25mg tablets (Sandoz Ltd)	Losartan potassium
ACE/ARB	40711	97243020	Losartan 2.5mg/ml oral suspension sugar free	Losartan potassium
ACE/ARB	55296	1660020	Losartan 50mg tablets (Mylan)	Losartan potassium
ACE/ARB	61288	10519020	Losartan 100mg tablets (Accord Healthcare Ltd)	Losartan potassium
ACE/ARB	59903	35427020	Losartan 50mg/5ml oral suspension	Losartan potassium
ACE/ARB	55718	1644020	Losartan 25mg tablets (Phoenix Healthcare Distribution Ltd)	Losartan potassium
ACE/ARB	54049	1669020	Losartan 50mg tablets (Accord Healthcare Ltd)	Losartan potassium
ACE/ARB	1780	76332020	Losartan 50mg tablets	Losartan potassium
ACE/ARB	14965	80730020	Cozaar 100mg tablets (Merck Sharp & Dohme Ltd)	Losartan potassium
ACE/ARB	56104	1658020	Losartan 50mg tablets (A A H Pharmaceuticals Ltd)	Losartan potassium
ACE/ARB	69858	1642020	Losartan 25mg tablets (Alliance Healthcare (Distribution) Ltd)	Losartan potassium
ACE/ARB	54735	1661020	Losartan 50mg tablets (Alliance Healthcare (Distribution) Ltd)	Losartan potassium
ACE/ARB	62388	24026021	Losartan 12.5mg tablets (DE Pharmaceuticals)	Losartan potassium
ACE/ARB	54740	77731020	Losartan 25mg tablets (Actavis UK Ltd)	Losartan potassium
ACE/ARB	58967	35999020	Losartan 12.5mg tablets (Alliance Healthcare (Distribution) Ltd)	Losartan potassium
ACE/ARB	50971	1640020	Losartan 25mg tablets (A A H Pharmaceuticals Ltd)	Losartan potassium
ACE/ARB	60506	77323020	Losartan 100mg tablets (Dexcel-Pharma Ltd)	Losartan potassium
ACE/ARB	55446	43882020	Losartan 100mg tablets (Bristol Laboratories Ltd)	Losartan potassium
ACE/ARB	68340	68779021	Losartan 12.5mg tablets (Consilient Health Ltd)	Losartan potassium
ACE/ARB	63222	1645020	Losartan 25mg tablets (Pfizer Ltd)	Losartan potassium
ACE/ARB	59340	77317020	Losartan 12.5mg tablets (Dexcel-Pharma Ltd)	Losartan potassium
ACE/ARB	64888	53033021	Losartan 12.5mg tablets (Sigma Pharmaceuticals Plc)	Losartan potassium
ACE/ARB	39944	96963020	Losartan 12.5mg tablets	Losartan potassium
ACE/ARB	66551	43814020	Losartan 50mg tablets (Bristol Laboratories Ltd)	Losartan potassium
ACE/ARB	624	79160020	Losartan 100mg tablets	Losartan potassium
ACE/ARB	4226	76329020	Cozaar 25mg tablets (Merck Sharp & Dohme Ltd)	Losartan potassium
ACE/ARB	48398	77320020	Losartan 25mg tablets (Dexcel-Pharma Ltd)	Losartan potassium
ACE/ARB	59086	41899020	Losartan 25mg tablets (Wockhardt UK Ltd)	Losartan potassium
ACE/ARB	51186	1643020	Losartan 25mg tablets (Arrow Generics Ltd)	Losartan potassium
ACE/ARB	66114	60052021	Losartan 12.5mg tablets (Mawdsley-Brooks & Company Ltd)	Losartan potassium
ACE/ARB	57028	10512020	Losartan 100mg tablets (Mylan)	Losartan potassium
ACE/ARB	520	76333020	Losartan 25mg tablets	Losartan potassium
ACE/ARB	59750	14778021	Losartan 50mg tablets (Aptil Pharma Ltd)	Losartan potassium
ACE/ARB	70765	68395021	Losartan 100mg tablets (Almus Pharmaceuticals Ltd)	Losartan potassium
ACE/ARB	52886	35998020	Losartan 12.5mg tablets (A A H Pharmaceuticals Ltd)	Losartan potassium
ACE/ARB	49492	1641020	Losartan 25mg tablets (Mylan)	Losartan potassium
ACE/ARB	63918	77296020	Losartan 25mg tablets (Teva UK Ltd)	Losartan potassium
ACE/ARB	61053	10513020	Losartan 100mg tablets (Alliance Healthcare (Distribution) Ltd)	Losartan potassium
ACE/ARB	47006	77302020	Losartan 100mg tablets (Teva UK Ltd)	Losartan potassium
ACE/ARB	61754	35460020	Losartan 25mg/5ml oral suspension	Losartan potassium
ACE/ARB	59351	1666020	Losartan 50mg tablets (Pfizer Ltd)	Losartan potassium
ACE/ARB	40571	96965020	Cozaar 12.5mg tablets (Merck Sharp & Dohme Ltd)	Losartan potassium
ACE/ARB	70325	68366021	Losartan 50mg tablets (Almus Pharmaceuticals Ltd)	Losartan potassium
ACE/ARB	5723	76328020	Cozaar 50mg tablets (Merck Sharp & Dohme Ltd)	Losartan potassium
ACE/ARB	49588	10510020	Losartan 100mg tablets (A A H Pharmaceuticals Ltd)	Losartan potassium
ACE/ARB	56970	10517020	Losartan 100mg tablets (Pfizer Ltd)	Losartan potassium
ACE/ARB	52427	10518020	Cozaar 100mg tablets (Necessity Supplies Ltd)	Losartan potassium
ACE/ARB	6285	78212020	Olmesartan medoxomil 20mg tablets	Olmesartan medoxomil
ACE/ARB	6217	78179020	Olmesartan medoxomil 10mg tablets	Olmesartan medoxomil
ACE/ARB	6351	78176020	Olmesartan medoxomil 40mg tablets	Olmesartan medoxomil
ACE/ARB	14983	78194020	Olmetec 10mg tablets (Daiichi Sankyo UK Ltd)	Olmesartan medoxomil
ACE/ARB	20117	57407020	Olmetec 40mg tablets (Daiichi Sankyo UK Ltd)	Olmesartan medoxomil
ACE/ARB	39786	96351020	Olmesartan medoxomil 10mg/5ml oral suspension	Olmesartan medoxomil
ACE/ARB	18910	78191020	Olmetec 20mg tablets (Daiichi Sankyo UK Ltd)	Olmesartan medoxomil
ACE/ARB	17686	81476020	Micardis 20mg tablets (Boehringer Ingelheim Ltd)	Telmisartan
ACE/ARB	5988	74672020	Telmisartan 40mg tablets	Telmisartan
ACE/ARB	12874	74673020	Telmisartan 80mg tablets	Telmisartan
ACE/ARB	65274	21336021	Telmisartan 40mg tablets (Actavis UK Ltd)	Telmisartan
ACE/ARB	17545	81475020	Micardis 80mg tablets (Boehringer Ingelheim Ltd)	Telmisartan
ACE/ARB	6243	74674020	Telmisartan 20mg tablets	Telmisartan
ACE/ARB	13821	81474020	Micardis 40mg tablets (Boehringer Ingelheim Ltd)	Telmisartan
ACE/ARB	70251	21294021	Telmisartan 20mg tablets (Teva UK Ltd)	Telmisartan
ACE/ARB	61177	33020	Telmisartan 20mg tablets (Sigma Pharmaceuticals Plc)	Telmisartan
ACE/ARB	14943	88542020	Valsartan 40mg tablets	Valsartan
ACE/ARB	67663	1716020	Valsartan 160mg capsules (Dexcel-Pharma Ltd)	Valsartan
ACE/ARB	68948	1717020	Valsartan 160mg capsules (Actavis UK Ltd)	Valsartan
ACE/ARB	6518	83507020	Diovan 160mg capsules (Novartis Pharmaceuticals UK Ltd)	Valsartan
ACE/ARB	3222	83502020	Valsartan 80mg capsules	Valsartan
ACE/ARB	11251	83505020	Diovan 40mg capsules (Novartis Pharmaceuticals UK Ltd)	Valsartan
ACE/ARB	38395	91976020	Valsartan 80mg tablets	Valsartan
ACE/ARB	70628	99477020	Diovan 3mg/1ml oral solution (Novartis Pharmaceuticals UK Ltd)	Valsartan
ACE/ARB	39199	94445020	Diovan 320mg tablets (Novartis Pharmaceuticals UK Ltd)	Valsartan
ACE/ARB	71028	39797020	Valsartan 80mg capsules (Arrow Generics Ltd)	Valsartan
ACE/ARB	58669	1689020	Valsartan 40mg capsules (Teva UK Ltd)	Valsartan
ACE/ARB	24359	88544020	Diovan 40mg tablets (Novartis Pharmaceuticals UK Ltd)	Valsartan
ACE/ARB	58910	1699020	Valsartan 80mg capsules (Sigma Pharmaceuticals Plc)	Valsartan
ACE/ARB	54726	78678020	Valsartan 40mg capsules (Teva UK Ltd)	Valsartan
ACE/ARB	44778	91979020	Valsartan 160mg tablets	Valsartan
ACE/ARB	59448	38828020	Valsartan 80mg capsules (A A H Pharmaceuticals Ltd)	Valsartan
ACE/ARB	575	83501020	Valsartan 40mg capsules	Valsartan
ACE/ARB	53833	38960020	Valsartan 160mg capsules (Mylan)	Valsartan
ACE/ARB	37573	94443020	Valsartan 320mg tablets	Valsartan
ACE/ARB	59029	99475020	Valsartan 3mg/1ml oral solution	Valsartan
ACE/ARB	55187	39798020	Valsartan 160mg capsules (Arrow Generics Ltd)	Valsartan
ACE/ARB	61442	1715020	Valsartan 160mg capsules (Teva UK Ltd)	Valsartan
ACE/ARB	60076	47156020	Valsartan 160mg capsules (Waymade Healthcare Plc)	Valsartan
ACE/ARB	11252	83506020	Diovan 80mg capsules (Novartis Pharmaceuticals UK Ltd)	Valsartan
ACE/ARB	55821	78684020	Valsartan 160mg capsules (Teva UK Ltd)	Valsartan
ACE/ARB	45600	98993020	Diovan 160mg Tablet (Novartis Pharmaceuticals UK Ltd)	Valsartan
ACE/ARB	4645	83503020	Valsartan 160mg capsules	Valsartan
ACE/ARB	74066	10704020	Ramipril 10mg tablets (Tillomed Laboratories Ltd)	Ramipril
ACE/ARB	74155	79738021	Lisinopril 5mg tablets (Aurobindo Pharma Ltd)	Lisinopril
ACE/ARB	73659	63320020	Captopril 50mg tablets (Kent Pharmaceuticals Ltd)	Captopril
ACE/ARB	73716	80551021	Lisinopril 2.5mg tablets (Crescent Pharma Ltd)	Lisinopril
ACE/ARB	73672	79739021	Lisinopril 10mg tablets (Aurobindo Pharma Ltd)	Lisinopril
ACE/ARB	73617	30772020	Enalapril 1.5mg/5ml oral suspension	Enalapril maleate
ACE/ARB	73459	39753020	Ramipril 2.5mg/5ml oral solution sugar free (A A H Pharmaceuticals Ltd)	Ramipril
ACE/ARB	73389	21323021	Enalapril 2.5mg tablets (DE Pharmaceuticals)	Enalapril maleate
ACE/ARB	72842	78199021	Ramipril 10mg capsules (Wockhardt UK Ltd)	Ramipril
ACE/ARB	73484	87450020	Tritace 5mg Tablet (Sterwin Medicines)	Ramipril
ACE/ARB	72941	33594020	Perindopril erbumine 1mg/5ml oral suspension	Perindopril erbumine
ACE/ARB	72295	75186020	Perindopril 2mg Tablet (Neo Laboratories Ltd)	Perindopril erbumine
ACE/ARB	72341	78197021	Ramipril 2.5mg capsules (Wockhardt UK Ltd)	Ramipril
ACE/ARB	72336	14471021	Lisinopril 5mg tablets (Waymade Healthcare Plc)	Lisinopril
ACE/ARB	72038	1442020	Lisinopril 2.5mg tablets (Relonchem Ltd)	Lisinopril
ACE/ARB	72017	19797020	Enalapril 1.25mg/5ml oral solution	Enalapril maleate
ACE/ARB	71737	71472020	Enalapril 2.5mg tablets (Almus Pharmaceuticals Ltd)	Enalapril maleate
ACE/ARB	71668	71481020	Enalapril 20mg tablets (Almus Pharmaceuticals Ltd)	Enalapril maleate
ACE/ARB	71562	65062020	Lisinopril 10mg Tablet (Niche Generics Ltd)	Lisinopril
ACE/ARB	71491	44887021	Ramipril 2.5mg capsules (Ennogen Pharma Ltd)	Ramipril
ACE/ARB	71277	19300020	Captopril 7.5mg/5ml oral suspension	Captopril
ACE/ARB	74055	36593020	Valsartan 40mg/5ml oral solution	Valsartan
ACE/ARB	71215	44378020	Irbesartan 75mg tablets (Actavis UK Ltd)	Irbesartan
ACE/ARB	72000	43820020	Irbesartan 150mg tablets (Alliance Healthcare (Distribution) Ltd)	Irbesartan
ACE/ARB	71910	1668020	Losartan 50mg tablets (Necessity Supplies Ltd)	Losartan potassium
ACE/ARB	72215	41314020	Candesartan 4mg tablets (Consilient Health Ltd)	Candesartan cilexetil
ACE/ARB	72924	21333021	Candesartan 4mg tablets (Phoenix Healthcare Distribution Ltd)	Candesartan cilexetil
ACE/ARB	73528	79473021	Candesartan 4mg tablets (Milpharm Ltd)	Candesartan cilexetil
ACE/ARB	73811	17399021	Candesartan 2mg tablets (Ranbaxy (UK) Ltd)	Candesartan cilexetil
ACE/ARB	73813	47161020	Candesartan 4mg tablets (Waymade Healthcare Plc)	Candesartan cilexetil
ACE/ARB	74057	36595020	Valsartan 40mg/5ml oral suspension	Valsartan
ACE/ARB	74013	1708020	Diovan 160mg capsules (DE Pharmaceuticals)	Valsartan
Alcohol Dependence	2598	81317020	Acamprosate 333mg gastro-resistant tablets	Acamprosate calcium
Alcohol Dependence	6759	86993020	Campral EC 333mg tablets (Merck Serono Ltd)	Acamprosate calcium
Alcohol Dependence	5628	81315020	Campral ec 333mg Gastro-resistant tablet (Lipha Pharmaceuticals Ltd)	Acamprosate calcium
Alcohol Dependence	56720	16260021	Nalmefene 18mg tablets	Nalmefene hydrochloride
Alcohol Dependence	57225	16261021	Selincro 18mg tablets (Lundbeck Ltd)	Nalmefene hydrochloride
Alcohol Dependence	69570	73883021	Disulfiram 500mg tablets	Disulfiram
Alcohol Dependence	871	62716020	Disulfiram 200mg tablets	Disulfiram
Alcohol Dependence	2269	57840020	Antabuse 200mg tablets (Actavis UK Ltd)	Disulfiram
Alcohol Dependence	60240	16638021	Disulfiram 500mg tablets	Disulfiram
Alcohol Dependence	60514	16639021	Esperal 500mg tablets (IDIS)	Disulfiram
Alcohol Dependence	70528	57339021	Disulfiram 200mg tablets (Alliance Healthcare (Distribution) Ltd)	Disulfiram
Alcohol Dependence	69396	27337021	Disulfiram 250mg tablets	Disulfiram
Alcohol Dependence	65691	27338021	Antabuse 250mg tablets (Imported (United States))	Disulfiram
Alcohol Dependence	2598	81317020	Acamprosate 333mg gastro-resistant tablets	Acamprosate calcium
Alcohol Dependence	6759	86993020	Campral EC 333mg tablets (Merck Serono Ltd)	Acamprosate calcium
Alcohol Dependence	5628	81315020	Campral ec 333mg Gastro-resistant tablet (Lipha Pharmaceuticals Ltd)	Acamprosate calcium
Alcohol Dependence	56720	16260021	Nalmefene 18mg tablets	Nalmefene hydrochloride
Alcohol Dependence	57225	16261021	Selincro 18mg tablets (Lundbeck Ltd)	Nalmefene hydrochloride
Alcohol Dependence	69570	73883021	Disulfiram 500mg tablets	Disulfiram
Alcohol Dependence	871	62716020	Disulfiram 200mg tablets	Disulfiram
Alcohol Dependence	2269	57840020	Antabuse 200mg tablets (Actavis UK Ltd)	Disulfiram
Alcohol Dependence	60240	16638021	Disulfiram 500mg tablets	Disulfiram
Alcohol Dependence	60514	16639021	Esperal 500mg tablets (IDIS)	Disulfiram
Alcohol Dependence	70528	57339021	Disulfiram 200mg tablets (Alliance Healthcare (Distribution) Ltd)	Disulfiram
Alcohol Dependence	69396	27337021	Disulfiram 250mg tablets	Disulfiram
Alcohol Dependence	65691	27338021	Antabuse 250mg tablets (Imported (United States))	Disulfiram
Alpha-blockant	74037	1316020	Hytrin 5mg tablets (Waymade Healthcare Plc)	Terazosin hydrochloride
Alpha-blockant	57145	65774020	Terazosin 2mg tablets (A A H Pharmaceuticals Ltd)	Terazosin hydrochloride
Alpha-blockant	3924	68056020	Terazosin 5mg tablets	Terazosin hydrochloride
Alpha-blockant	4637	68055020	Terazosin 2mg tablets	Terazosin hydrochloride
Alpha-blockant	72644	65779020	Terazosin 5mg tablets (A A H Pharmaceuticals Ltd)	Terazosin hydrochloride
Alpha-blockant	16201	51572020	Hytrin bph 2mg Tablet (Amdipharm Plc)	Terazosin hydrochloride
Alpha-blockant	36780	93862020	Hytrin 5mg tablets (AMCo)	Terazosin hydrochloride
Alpha-blockant	8077	68062020	Hytrin 2mg Tablet (Abbott Laboratories Ltd)	Terazosin hydrochloride
Alpha-blockant	65442	63816020	Terazosin 5mg tablets (Mylan)	Terazosin hydrochloride
Alpha-blockant	4875	68058020	Terazosin 10mg tablets	Terazosin hydrochloride
Alpha-blockant	2348	51017020	Hytrin bph 10mg Tablet (Amdipharm Plc)	Terazosin hydrochloride
Alpha-blockant	71419	1332020	Hytrin 2mg tablets (Waymade Healthcare Plc)	Terazosin hydrochloride
Alpha-blockant	2347	68066020	Hytrin 10mg Tablet (Abbott Laboratories Ltd)	Terazosin hydrochloride
Alpha-blockant	3923	83746020	Terazosin BPH starter pack 7x1mg with 14x2mg with 7x5mg	Terazosine
Alpha-blockant	36649	93860020	Hytrin 2mg tablets (AMCo)	Terazosin hydrochloride
Alpha-blockant	5337	51573020	Hytrin bph 5mg Tablet (Amdipharm Plc)	Terazosin hydrochloride
Alpha-blockant	37428	93864020	Hytrin 10mg tablets (AMCo)	Terazosin hydrochloride
Alpha-blockant	3470	68054020	Terazosin 1mg tablets	Terazosine
Alpha-blockant	2346	68063020	Hytrin 5mg Tablet (Abbott Laboratories Ltd)	Terazosin hydrochloride
Alpha-blockant	26237	51807020	Alphavase 500microgram Tablet (Ashbourne Pharmaceuticals Ltd)	Prazosin hydrochloride
Alpha-blockant	60316	54584020	Prazosin 1mg Tablet (Approved Prescription Services Ltd)	Prazosin hydrochloride
Alpha-blockant	5183	49882020	Hypovase 2mg tablets (Pfizer Ltd)	Prazosin hydrochloride
Alpha-blockant	41721	54210020	Prazosin 1mg tablets (A A H Pharmaceuticals Ltd)	Prazosin hydrochloride
Alpha-blockant	1455	66153020	Prazosin 500microgram tablets	Prazosin hydrochloride
Alpha-blockant	41652	54209020	Prazosin 500microgram tablets (A A H Pharmaceuticals Ltd)	Prazosin hydrochloride
Alpha-blockant	726	66155020	Prazosin 2mg tablets	Prazosin hydrochloride
Alpha-blockant	3715	66158020	Prazosin 5mg tablets	Prazosin hydrochloride
Alpha-blockant	25047	68287020	Hypovase benign prostatic hyperplasia 500microgram Tablet (Pfizer Ltd)	Prazosin hydrochloride
Alpha-blockant	591	66154020	Prazosin 1mg tablets	Prazosin hydrochloride
Alpha-blockant	8198	49886020	Hypovase 5mg Tablet (Pfizer Ltd)	Prazosin hydrochloride
Alpha-blockant	26238	51808020	Alphavase 1 tablets (Ashbourne Pharmaceuticals Ltd)	Prazosin hydrochloride
Alpha-blockant	55826	54216020	Prazosin 5mg tablets (A A H Pharmaceuticals Ltd)	Prazosin hydrochloride
Alpha-blockant	43547	54222020	Prazosin 500microgram tablets (IVAX Pharmaceuticals UK Ltd)	Prazosin hydrochloride
Alpha-blockant	4111	49880020	Hypovase 500microgram tablets (Pfizer Ltd)	Prazosin hydrochloride
Alpha-blockant	1292	49881020	Hypovase 1mg tablets (Pfizer Ltd)	Prazosin hydrochloride
Alpha-blockant	8863	68288020	Hypovase benign prostatic hyperplasia 1mg Tablet (Pfizer Ltd)	Prazosin hydrochloride
Alpha-blockant	23459	68291020	Hypovase benign prostatic hyperplasia 2mg Tablet (Pfizer Ltd)	Prazosin hydrochloride
Alpha-blockant	26693	68286020	Hypovase benign prostatic hyperplasia bd BD Starter pack (Pfizer Ltd)	Prazosin Hydrochloride
Alpha-blockant	41651	54583020	Prazosin 500microgram Tablet (Approved Prescription Services Ltd)	Prazosin hydrochloride
Alpha-blockant	46922	54223020	Prazosin 1mg tablets (IVAX Pharmaceuticals UK Ltd)	Prazosin hydrochloride
Alpha-blockant	13610	51809020	Alphavase 2 tablets (Ashbourne Pharmaceuticals Ltd)	Prazosin hydrochloride
Alpha-blockant	19823	51736020	Alphavase 5 tablets (Ashbourne Pharmaceuticals Ltd)	Prazosin hydrochloride
Alpha-blockant	53033	8020	Doxzogen XL 4mg tablets (Mylan)	Doxazosin mesilate
Alpha-blockant	1294	69310020	Doxazosin 4mg tablets	Doxazosin mesilate
Alpha-blockant	4694	72784020	Terazosin 2mg tablets and Terazosin 1mg tablets
Alpha-blockant	68161	53280021	Doxazosin 4mg tablets (Mawdsley-Brooks & Company Ltd)	Doxazosin mesilate
Alpha-blockant	71405	9020	Cardura XL 4mg tablets (DE Pharmaceuticals)	Doxazosin mesilate
Alpha-blockant	119	69308020	Doxazosin 1mg tablets	Doxazosin mesilate
Alpha-blockant	61066	1353020	Doxazosin 2mg tablets (Bristol Laboratories Ltd)	Doxazosin mesilate
Alpha-blockant	23010	65697020	Rogitine 10mg/1ml solution for injection ampoules (Alliance Pharmaceuticals Ltd)	Phentolamine mesilate
Alpha-blockant	73116	66547020	Doxazosin 2mg tablets (Sovereign Medical Ltd)	Doxazosin mesilate
Alpha-blockant	61283	1358020	Doxazosin 4mg tablets (Alliance Healthcare (Distribution) Ltd)	Doxazosin mesilate
Alpha-blockant	71955	25614021	Tamsulosin 400microgram modified-release tablets (A A H Pharmaceuticals Ltd)	Tamsulosin hydrochloride
Alpha-blockant	47807	77113020	Doxazosin xl 4mg Tablet (Hillcross Pharmaceuticals Ltd)	Doxazosin mesilate
Alpha-blockant	8086	69315020	Cardura 4mg Tablet (Pfizer Ltd)	Doxazosin mesilate
Alpha-blockant	53322	1362020	Doxazosin 4mg tablets (Bristol Laboratories Ltd)	Doxazosin mesilate
Alpha-blockant	5496	84706020	Doxazosin 8mg modified-release tablets	Doxazosin mesilate
Alpha-blockant	46206	99332020	Pamsvax XL 400microgram capsules (Almus Pharmaceuticals Ltd)	Tamsulosin hydrochloride
Alpha-blockant	63158	71466020	Doxazosin 2mg tablets (Almus Pharmaceuticals Ltd)	Doxazosin mesilate
Alpha-blockant	493	69309020	Doxazosin 2mg tablets	Doxazosin mesilate
Alpha-blockant	35603	93725020	Doxazosin 4mg/5ml oral suspension	Doxazosin mesilate
Alpha-blockant	38461	93900020	Cardozin XL 4mg tablets (Arrow Generics Ltd)	Doxazosin mesilate
Alpha-blockant	46066	99273020	Cardozin XL 4mg tablets (Almus Pharmaceuticals Ltd)	Doxazosin mesilate
Alpha-blockant	58276	38497020	Doxazosin 2mg tablets (Medreich Plc)	Doxazosin mesilate
Alpha-blockant	46526	99138020	Raporsin XL 4mg tablets (Actavis UK Ltd)	Doxazosin mesilate
Alpha-blockant	36282	91931020	Morvesin XL 400microgram capsules (Sandoz Ltd)	Tamsulosin hydrochloride
Alpha-blockant	51685	65764020	Doxazosin 4mg tablets (Actavis UK Ltd)	Doxazosin mesilate
Alpha-blockant	45342	64318020	Doxazosin 4mg tablets (Sandoz Ltd)	Doxazosin mesilate
Alpha-blockant	65853	53278021	Doxazosin 1mg tablets (Mawdsley-Brooks & Company Ltd)	Doxazosin mesilate
Alpha-blockant	61123	20657021	Doxazosin 4mg/5ml oral solution	Doxazosin mesilate
Alpha-blockant	40256	96646020	Baratol 25mg tablets (Amdipharm Plc)	Indoramin hydrochloride
Alpha-blockant	25487	80419020	Cascor 2mg tablets (Ranbaxy (UK) Ltd)	Doxazosin mesilate
Alpha-blockant	34553	64041020	Doxazosin 4mg tablets (Mylan)	Doxazosin mesilate
Alpha-blockant	4802	69314020	Cardura 2mg tablets (Pfizer Ltd)	Doxazosin mesilate
Alpha-blockant	65159	20149021	Doxazosin 4mg tablets (Waymade Healthcare Plc)	Doxazosin mesilate
Alpha-blockant	19193	64070020	Doxazosin 2mg tablets (Teva UK Ltd)	Doxazosin mesilate
Alpha-blockant	59209	65452020	Doxazosin 1mg tablets (Kent Pharmaceuticals Ltd)	Doxazosin mesilate
Alpha-blockant	5815	63556020	Indoramin 25mg tablets	Indoramin hydrochloride
Alpha-blockant	53964	7182020	Tamsulosin 400microgram modified-release capsules (A A H Pharmaceuticals Ltd)	Tamsulosin hydrochloride
Alpha-blockant	50467	1346020	Doxazosin 2mg tablets (Alliance Healthcare (Distribution) Ltd)	Doxazosin mesilate
Alpha-blockant	45584	72200020	Phenoxybenzamine 100mg/2ml solution for infusion ampoules	Phenoxybenzamine hydrochloride
Alpha-blockant	460	81589020	Flomax MR 400microgram capsules (Astellas Pharma Ltd)	Tamsulosin hydrochloride
Alpha-blockant	35466	93509020	Alphacard MR 400microgram capsules (Ratiopharm UK Ltd)	Tamsulosin hydrochloride
Alpha-blockant	582	84705020	Doxazosin 4mg modified-release tablets	Doxazosin mesilate
Alpha-blockant	33788	70455020	Metirosine 250mg Capsule	Metirosine
Alpha-blockant	16198	48296020	Baratol 50mg Tablet (Shire Pharmaceuticals Ltd)	Indoramin Hydrochloride
Alpha-blockant	48150	65746020	Doxazosin 1mg tablets (Actavis UK Ltd)	Doxazosin mesilate
Alpha-blockant	28441	90605020	Pamsvax XL 400microgram capsules (Actavis UK Ltd)	Tamsulosin hydrochloride
Alpha-blockant	41543	64244020	Doxazosin 1mg tablets (IVAX Pharmaceuticals UK Ltd)	Doxazosin mesilate
Alpha-blockant	56145	65760020	Doxazosin 2mg tablets (Actavis UK Ltd)	Doxazosin mesilate
Alpha-blockant	7759	65687020	Phenoxybenzamine 10mg capsules	Phenoxybenzamine hydrochloride
Alpha-blockant	14932	90569020	Tabphyn MR 400microgram capsules (Kyowa Kirin Ltd)	Tamsulosin hydrochloride
Alpha-blockant	62019	71463020	Doxazosin 1mg tablets (Almus Pharmaceuticals Ltd)	Doxazosin mesilate
Alpha-blockant	59862	64188020	Doxazosin 4mg tablets (Dexcel-Pharma Ltd)	Doxazosin mesilate
Alpha-blockant	62553	7181020	Tamsulosin 400microgram modified-release capsules (Alliance Healthcare (Distribution) Ltd)	Tamsulosin hydrochloride
Alpha-blockant	34080	90571020	Stronazon 400microgram MR capsules (Actavis UK Ltd)	Tamsulosin hydrochloride
Alpha-blockant	68584	7180020	Tabphyn MR 400microgram capsules (Genus Pharmaceuticals Ltd)	Tamsulosin hydrochloride
Alpha-blockant	6008	84651020	Omnic 400microgram Modified-release capsule (Paines & Byrne Ltd)	Tamsulosin hydrochloride
Alpha-blockant	60319	1344020	Doxazosin 1mg tablets (Bristol Laboratories Ltd)	Doxazosin mesilate
Alpha-blockant	43695	93902020	Colixil XL 4mg tablets (Sandoz Ltd)	Doxazosin mesilate
Alpha-blockant	45328	64311020	Doxazosin 1mg tablets (Sandoz Ltd)	Doxazosin mesilate
Alpha-blockant	37243	93699020	Cardozin xl 4mg Tablet (Teva UK Ltd)	Doxazosin mesilate
Alpha-blockant	65124	26643021	Tamsulosin 400micrograms/5ml oral solution	Tamsulosin hydrochloride
Alpha-blockant	9019	63557020	Indoramin 50mg Tablet	Indoramin Hydrochloride
Alpha-blockant	7056	89356020	Tamsulosin 400microgram modified-release tablets	Tamsulosin hydrochloride
Alpha-blockant	2816	69659020	Indoramin 20mg tablets	Indoramin hydrochloride
Alpha-blockant	73637	66165020	Doxazosin 1mg tablets (Sterwin Medicines)	Doxazosin mesilate
Alpha-blockant	73300	7188020	Tamsulosin 400microgram modified-release capsules (Sigma Pharmaceuticals Plc)	Tamsulosin hydrochloride
Alpha-blockant	64233	20147021	Doxazosin 1mg tablets (Waymade Healthcare Plc)	Doxazosin mesilate
Alpha-blockant	27403	91285020	Omnic MR 400microgram capsules (Astellas Pharma Ltd)	Tamsulosin hydrochloride
Alpha-blockant	12545	65694020	Phentolamine 10mg/1ml solution for injection ampoules	Phentolamine mesilate
Alpha-blockant	25551	80421020	Cascor 4mg tablets (Ranbaxy (UK) Ltd)	Doxazosin mesilate
Alpha-blockant	33094	64037020	Doxazosin 2mg tablets (Mylan)	Doxazosin mesilate
Alpha-blockant	755	85762020	Cardura XL 4mg tablets (Pfizer Ltd)	Doxazosin mesilate
Alpha-blockant	11394	48295020	Baratol 25mg Tablet (Shire Pharmaceuticals Ltd)	Indoramin hydrochloride
Alpha-blockant	62300	78941020	Phenoxybenzamine 10mg capsules (AMCo)	Phenoxybenzamine hydrochloride
Alpha-blockant	57448	64175020	Doxazosin 4mg tablets (A A H Pharmaceuticals Ltd)	Doxazosin mesilate
Alpha-blockant	634	81587020	Tamsulosin 400microgram modified-release capsules	Tamsulosin hydrochloride
Alpha-blockant	45265	75714020	Doxazosin sr 4mg Tablet (Generics (UK) Ltd)	Doxazosin mesilate
Alpha-blockant	35925	92805020	Contiflo XL 400microgram capsules (Ranbaxy (UK) Ltd)	Tamsulosin hydrochloride
Alpha-blockant	69319	21703021	Doxazosin 2mg tablets (DE Pharmaceuticals)	Doxazosin mesilate
Alpha-blockant	57074	1352020	Doxazosin 2mg tablets (Sigma Pharmaceuticals Plc)	Doxazosin mesilate
Alpha-blockant	34715	64168020	Doxazosin 1mg tablets (A A H Pharmaceuticals Ltd)	Doxazosin mesilate
Alpha-blockant	52159	7186020	Tamsulosin 400microgram modified-release capsules (Focus Pharmaceuticals Ltd)	Tamsulosin hydrochloride
Alpha-blockant	34342	64067020	Doxazosin 1mg tablets (Teva UK Ltd)	Doxazosin mesilate
Alpha-blockant	34601	64033020	Doxazosin 1mg tablets (Mylan)	Doxazosin mesilate
Alpha-blockant	70733	14629021	Flectone XL 400microgram tablets (Teva UK Ltd)	Tamsulosin hydrochloride
Alpha-blockant	55916	1340020	Doxazosin 1mg tablets (Alliance Healthcare (Distribution) Ltd)	Doxazosin mesilate
Alpha-blockant	20369	90119020	Doxazosin 1mg/5ml oral suspension	Doxazosin mesilate
Alpha-blockant	68022	66550020	Doxazosin 4mg tablets (Sovereign Medical Ltd)	Doxazosin mesilate
Alpha-blockant	36023	92057020	Cardozin xl 4mg Tablet (Hillcross Pharmaceuticals Ltd)	Doxazosin mesilate
Alpha-blockant	42462	90857020	Kirtacap mr 400microgram Capsule (Consilient Health Ltd)	Tamsulosin hydrochloride
Alpha-blockant	7549	58779020	Doxadura 1mg tablets (Discovery Pharmaceuticals)	Doxazosin mesilate
Alpha-blockant	69757	30760020	Doxazosin 8mg/5ml oral suspension	Doxazosin mesilate
Alpha-blockant	31109	90603020	Prosurin XL 400microgram capsules (Mylan)	Tamsulosin hydrochloride
Alpha-blockant	74000	6020	Cardura XL 4mg tablets (Waymade Healthcare Plc)	Doxazosin mesilate
Alpha-blockant	10134	89358020	Flomaxtra XL 400microgram tablets (Astellas Pharma Ltd)	Tamsulosin hydrochloride
Alpha-blockant	40678	64073020	Doxazosin 4mg tablets (Teva UK Ltd)	Doxazosin mesilate
Alpha-blockant	57784	30736020	Doxazosin 2mg/5ml oral suspension	Doxazosin mesilate
Alpha-blockant	72348	26623021	Doxazosin 1mg/5ml oral solution	Doxazosin mesilate
Alpha-blockant	19216	64260020	Doxazosin 4mg tablets (IVAX Pharmaceuticals UK Ltd)	Doxazosin mesilate
Alpha-blockant	51665	7190020	Tamurex 400microgram modified-release capsules (Somex Pharma)	Tamsulosin hydrochloride
Alpha-blockant	34625	64171020	Doxazosin 2mg tablets (A A H Pharmaceuticals Ltd)	Doxazosin mesilate
Alpha-blockant	36740	92709020	Slocinx XL 4mg tablets (Zentiva)	Doxazosin mesilate
Alpha-blockant	62351	1357020	Doxazosin 2mg tablets (Phoenix Healthcare Distribution Ltd)	Doxazosin mesilate
Alpha-blockant	63314	66544020	Doxazosin 1mg tablets (Sovereign Medical Ltd)	Doxazosin mesilate
Alpha-blockant	62158	71469020	Doxazosin 4mg tablets (Almus Pharmaceuticals Ltd)	Doxazosin mesilate
Alpha-blockant	40810	94251020	Phenoxybenzamine 10mg/5ml oral suspension	Phenoxybenzamine hydrochloride
Alpha-blockant	35272	93137020	Doxadura XL 4mg tablets (Discovery Pharmaceuticals)	Doxazosin mesilate
Alpha-blockant	54918	93155020	Phenoxybenzamine oral liquid	Phenoxybenzamine Hydrochloride
Alpha-blockant	44553	98716020	Pinexel PR 400microgram capsules (Wockhardt UK Ltd)	Tamsulosin hydrochloride
Alpha-blockant	7547	83686020	Doxadura 2mg tablets (Discovery Pharmaceuticals)	Doxazosin mesilate
Alpha-blockant	52055	35345020	Tamsulosin 400microgram oral powder sachets	Tamsulosin hydrochloride
Alpha-blockant	45583	64184020	Doxazosin 2mg tablets (Dexcel-Pharma Ltd)	Doxazosin mesilate
Alpha-blockant	60200	21704021	Doxazosin 4mg tablets (DE Pharmaceuticals)	Doxazosin mesilate
Alpha-blockant	40891	64251020	Doxazosin 2mg tablets (IVAX Pharmaceuticals UK Ltd)	Doxazosin mesilate
Alpha-blockant	8942	48961020	Dibenyline 10mg capsules (Mercury Pharma Group Ltd)	Phenoxybenzamine hydrochloride
Alpha-blockant	72346	30734020	Doxazosin 2mg/5ml oral solution	Doxazosin mesilate
Alpha-blockant	35312	90573020	Bazetham MR 400microgram capsules (Teva UK Ltd)	Tamsulosin hydrochloride
Alpha-blockant	58325	1363020	Doxazosin 4mg tablets (Phoenix Healthcare Distribution Ltd)	Doxazosin mesilate
Alpha-blockant	55906	64180020	Doxazosin 1mg tablets (Dexcel-Pharma Ltd)	Doxazosin mesilate
Alpha-blockant	24369	90585020	Petyme 400microgram MR capsules (Teva UK Ltd)	Tamsulosin hydrochloride
Alpha-blockant	54497	7189020	Galebon 400microgram modified-release capsules (Consilient Health Ltd)	Tamsulosin hydrochloride
Alpha-blockant	22454	70458020	Demser 250mg Capsule (Merck Sharp & Dohme Ltd)	Metirosine
Alpha-blockant	45040	99157020	Larbex XL 4mg tablets (Teva UK Ltd)	Doxazosin mesilate
Alpha-blockant	58517	551021	Faramsil 400microgram modified-release tablets (Sandoz Ltd)	Tamsulosin hydrochloride
Alpha-blockant	2117	69662020	Doralese Tiltab 20mg tablets (Chemidex Pharma Ltd)	Indoramin hydrochloride
Alpha-blockant	69622	68933021	Tamsulosin 400micrograms/5ml oral suspension	Tamsulosin hydrochloride
Alpha-blockant	42936	98154020	Flomax Relief MR 400microgram capsules (Sanofi)	Tamsulosin hydrochloride
Alpha-blockant	5618	85763020	Cardura XL 8mg tablets (Pfizer Ltd)	Doxazosin mesilate
Alpha-blockant	35058	90640020	Diffundox XL 400microgram capsules (Zentiva)	Tamsulosin hydrochloride
Alpha-blockant	66065	65455020	Doxazosin 2mg tablets (Kent Pharmaceuticals Ltd)	Doxazosin mesilate
Alpha-blockant	53084	21594020	Cositam XL 400microgram tablets (Consilient Health Ltd)	Tamsulosin hydrochloride
Alpha-blockant	4449	69313020	Cardura 1mg tablets (Pfizer Ltd)	Doxazosin mesilate
Alpha-blockant	54785	38498020	Doxazosin 4mg tablets (Medreich Plc)	Doxazosin mesilate
Alpha-blockant	10088	83886020	Doxadura 4mg tablets (Discovery Pharmaceuticals)	Doxazosin mesilate
Alpha-blockant	5624	75047020	Xatral 2.5mg tablets (Sanofi)	Alfuzosin hydrochloride
Alpha-blockant	2120	75051020	Alfuzosin 5mg modified-release tablets	Alfuzosin hydrochloride
Alpha-blockant	9422	80279020	Xatral sr 5mg Tablet (Sanofi-Synthelabo Ltd)	Alfuzosin hydrochloride
Alpha-blockant	56793	75889020	Alfuzosin 2.5mg tablets (Teva UK Ltd)	Alfuzosin hydrochloride
Alpha-blockant	36439	91993020	Zufal XL 10mg tablets (Teva UK Ltd)	Alfuzosin hydrochloride
Alpha-blockant	44268	98461020	Vasran XL 10mg tablets (Ranbaxy (UK) Ltd)	Alfuzosin hydrochloride
Alpha-blockant	58985	14112020	Xatral SR 5mg tablets (Sanofi-Synthelabo Ltd)	Alfuzosin hydrochloride
Alpha-blockant	71036	40571020	Alfuzosin 2.5mg tablets (Sandoz Ltd)	Alfuzosin hydrochloride
Alpha-blockant	39373	94511020	Fuzatal XL 10mg tablets (Teva UK Ltd)	Alfuzosin hydrochloride
Alpha-blockant	71090	7176020	Alfuzosin 10mg modified-release tablets (Mawdsley-Brooks & Company Ltd)	Alfuzosin hydrochloride
Alpha-blockant	2088	75050020	Alfuzosin 2.5mg tablets	Alfuzosin hydrochloride
Alpha-blockant	57549	7171020	Xatral 2.5mg tablets (Necessity Supplies Ltd)	Alfuzosin hydrochloride
Alpha-blockant	64443	7164020	Alfuzosin 2.5mg tablets (Sigma Pharmaceuticals Plc)	Alfuzosin hydrochloride
Alpha-blockant	5485	75052020	Alfuzosin 10mg modified-release tablets	Alfuzosin hydrochloride
Alpha-blockant	42820	73240020	Alfuzosin xl 10mg Tablet (Hillcross Pharmaceuticals Ltd)	Alfuzosin hydrochloride
Alpha-blockant	62539	21417021	Alfuzosin 10mg modified-release tablets (Phoenix Healthcare Distribution Ltd)	Alfuzosin hydrochloride
Alpha-blockant	47563	99309020	Besavar XL 10mg tablets (Actavis UK Ltd)	Alfuzosin hydrochloride
Alpha-blockant	5179	85580020	Xatral XL 10mg tablets (Sanofi)	Alfuzosin hydrochloride
Alpha-blockant	69082	26762021	Alfuzosin 10mg modified-release tablets (Sigma Pharmaceuticals Plc)	Alfuzosin hydrochloride
Alpha-blockant	55005	41399020	Kelanu XL 10mg tablets (Pfizer Ltd)	Alfuzosin hydrochloride
Alpha-blockant	35639	91786020	Besavar XL 10mg tablets (Zentiva)	Alfuzosin hydrochloride
Alpha-blockant	59676	21635021	Solifenacin 6mg / Tamsulosin 400microgram modified-release tablets	Tamsulosin hydrochloride/Solifenacin succinate
Alpha-blockant	59462	21636021	Vesomni 6mg/0.4mg modified-release tablets (Astellas Pharma Ltd)	Tamsulosin hydrochloride/Solifenacin succinate
Alpha-blockant	43567	98475020	Combodart 0.5mg/0.4mg capsules (GlaxoSmithKline UK Ltd)	Tamsulosin hydrochloride/Dutasteride
Alpha-blockant	43458	98473020	Tamsulosin 400microgram / Dutasteride 500microgram capsules	Tamsulosin hydrochloride/Dutasteride
Anti-anginals	13882	80846020	Imazin XL tablets (Napp Pharmaceuticals Ltd)	Aspirin/Isosorbide mononitrate
Anti-anginals	18030	80848020	Imazin XL forte tablets (Napp Pharmaceuticals Ltd)	Aspirin/Isosorbide mononitrate
Anti-anginals	21380	80852020	Aspirin 75mg / Isosorbide mononitrate 60mg modified-release tablets	Aspirin/Isosorbide mononitrate
Anti-anginals	21382	80853020	Aspirin 150mg / Isosorbide mononitrate 60mg modified-release tablets	Aspirin/Isosorbide mononitrate
Anti-anginals	55520	2114020	Glyceryl trinitrate 500microgram sublingual tablets (Phoenix Healthcare Distribution Ltd)	Glyceryl trinitrate
Anti-anginals	56011	2118020	Glyceryl trinitrate 400micrograms/dose sublingual spray	Glyceryl trinitrate
Anti-anginals	55089	2122020	Nitrolingual 400micrograms/dose pumpspray (Merck Serono Ltd)	Glyceryl trinitrate
Anti-anginals	57963	17048021	Glyceryl trinitrate 400micrograms/dose pump sublingual spray (Alliance Healthcare (Distribution) Ltd)	Glyceryl trinitrate
Anti-anginals	70781	23573021	Glyceryl trinitrate 400micrograms/dose aerosol sublingual spray (Aspire Pharma Ltd)	Glyceryl trinitrate
Anti-anginals	66733	26876021	Glyceryl trinitrate 400micrograms/dose aerosol sublingual spray (Colorama Pharmaceuticals Ltd)	Glyceryl trinitrate
Anti-anginals	53134	37809020	Glyceryl trinitrate 400micrograms/dose aerosol sublingual spray (Alliance Healthcare (Distribution) Ltd)	Glyceryl trinitrate
Anti-anginals	63621	37810020	Glyceryl trinitrate 400micrograms/dose aerosol sublingual spray (Kent Pharmaceuticals Ltd)	Glyceryl trinitrate
Anti-anginals	57688	37811020	Glyceryl trinitrate 400micrograms/dose aerosol sublingual spray (Sigma Pharmaceuticals Plc)	Glyceryl trinitrate
Anti-anginals	57935	37812020	Glyceryl trinitrate 400micrograms/dose aerosol sublingual spray (A A H Pharmaceuticals Ltd)	Glyceryl trinitrate
Anti-anginals	58148	37813020	Glyceryl trinitrate 400micrograms/dose pump sublingual spray (A A H Pharmaceuticals Ltd)	Glyceryl trinitrate
Anti-anginals	71121	37814020	Coro-Nitro 400micrograms/dose pump sublingual spray (DE Pharmaceuticals)	Glyceryl trinitrate
Anti-anginals	60935	37815020	Coro-Nitro 400micrograms/dose pump sublingual spray (Mawdsley-Brooks & Company Ltd)	Glyceryl trinitrate
Anti-anginals	50809	37816020	Nitrolingual 400micrograms/dose pump sublingual spray (DE Pharmaceuticals)	Glyceryl trinitrate
Anti-anginals	57143	37818020	Nitrolingual 400micrograms/dose pump sublingual spray (Mawdsley-Brooks & Company Ltd)	Glyceryl trinitrate
Anti-anginals	48232	37821020	Nitrolingual 400micrograms/dose pump sublingual spray (Merck Serono Ltd)	Glyceryl trinitrate
Anti-anginals	53416	37822020	Glyceryl trinitrate 400micrograms/dose pump sublingual spray (Actavis UK Ltd)	Glyceryl trinitrate
Anti-anginals	69391	42978021	Glyceryl trinitrate 400micrograms/dose aerosol sublingual spray (Pharma-z Ltd)	Glyceryl trinitrate
Anti-anginals	56446	44105020	Nitrolingual 400micrograms/dose pump sublingual spray (Waymade Healthcare Plc)	Glyceryl trinitrate
Anti-anginals	62154	47860020	Glyceryl trinitrate 400micrograms/dose pump sublingual spray (Aspire Pharma Ltd)	Glyceryl trinitrate
Anti-anginals	33991	49759020	Glyceryl trinitrate 500microgram sublingual tablets (Actavis UK Ltd)	Glyceryl trinitrate
Anti-anginals	4529	49760020	Glyceryl trinitrate 400micrograms/dose aerosol sublingual spray (Actavis UK Ltd)	Glyceryl trinitrate
Anti-anginals	42214	49761020	Glyceryl trinitrate 600microgram sublingual tablets (Actavis UK Ltd)	Glyceryl trinitrate
Anti-anginals	47805	49765020	Glyceryl trinitrate 500microgram Tablet (Celltech Pharma Europe Ltd)	Glyceryl trinitrate
Anti-anginals	68029	49769020	Glyceryl trinitrate 600microgram sublingual tablets (A A H Pharmaceuticals Ltd)	Glyceryl trinitrate
Anti-anginals	15746	49770020	Glyceryl trinitrate 500microgram sublingual tablets (A A H Pharmaceuticals Ltd)	Glyceryl trinitrate
Anti-anginals	1793	50712020	Nitrolingual 400microgram/dose Spray (Lipha Pharmaceuticals Ltd)	Glyceryl Trinitrate
Anti-anginals	1539	50713020	Nitrolingual 400microgram/dose Pump spray cfc free (Lipha Pharmaceuticals Ltd)	Glyceryl trinitrate
Anti-anginals	8367	51752020	Suscard buccal 1mg Tablet (Pharmax Ltd)	Glyceryl trinitrate
Anti-anginals	7559	51753020	Suscard buccal 2mg Tablet (Pharmax Ltd)	Glyceryl trinitrate
Anti-anginals	8651	51754020	Suscard buccal 3mg Tablet (Pharmax Ltd)	Glyceryl trinitrate
Anti-anginals	7767	51757020	Suscard buccal 5mg Tablet (Pharmax Ltd)	Glyceryl trinitrate
Anti-anginals	7761	51762020	Sustac 2.6mg modified-release tablets (Forest Laboratories UK Ltd)	Glyceryl trinitrate
Anti-anginals	8804	51763020	Sustac 6.4mg modified-release tablets (Forest Laboratories UK Ltd)	Glyceryl trinitrate
Anti-anginals	13553	51764020	Sustac 10mg modified-release tablets (Forest Laboratories UK Ltd)	Glyceryl trinitrate
Anti-anginals	2631	53308020	Transiderm-Nitro 5 transdermal patches (Novartis Pharmaceuticals UK Ltd)	Glyceryl trinitrate
Anti-anginals	2632	53311020	Transiderm-Nitro 10 transdermal patches (Novartis Pharmaceuticals UK Ltd)	Glyceryl trinitrate
Anti-anginals	40388	55343020	Glyceryl trinitrate 500microgram sublingual tablets (Teva UK Ltd)	Glyceryl trinitrate
Anti-anginals	18655	55540020	Nitrocontin continus 2.6mg Tablet (Viatris Pharmaceuticals Ltd)	Glyceryl trinitrate
Anti-anginals	17883	55541020	Nitrocontin continus 6.4mg Tablet (Viatris Pharmaceuticals Ltd)	Glyceryl trinitrate
Anti-anginals	2145	55697020	Glyceryl trinitrate 300microgram sublingual tablets	Glyceryl trinitrate
Anti-anginals	1145	55698020	Glyceryl trinitrate 500microgram sublingual tablets	Glyceryl trinitrate
Anti-anginals	7795	55699020	Glyceryl trinitrate 600microgram sublingual tablets	Glyceryl trinitrate
Anti-anginals	1260	56366020	Coro-nitro 400microgram/dose Spray (Roche Products Ltd)	Glyceryl Trinitrate
Anti-anginals	3909	56367020	Coro-nitro 400microgram/dose Pump spray cfc free (Roche Products Ltd)	Glyceryl trinitrate
Anti-anginals	3646	58528020	Minitran 5 transdermal patches (Meda Pharmaceuticals Ltd)	Glyceryl trinitrate
Anti-anginals	15581	58529020	Minitran 10 transdermal patches (Meda Pharmaceuticals Ltd)	Glyceryl trinitrate
Anti-anginals	15582	58530020	Minitran 15 transdermal patches (Meda Pharmaceuticals Ltd)	Glyceryl trinitrate
Anti-anginals	31247	61644020	Glyceryl trinitrate 400microgram/dose Spray (Sterwin Medicines)	Glyceryl trinitrate
Anti-anginals	39265	62320020	Glyceryl trinitrate 300microgram Tablet (Martindale Pharmaceuticals Ltd)	Glyceryl trinitrate
Anti-anginals	1184	62986020	Glyceryl trinitrate 400microgram/dose Spray	Glyceryl Trinitrate
Anti-anginals	1685	62987020	Glyceryl trinitrate 400micrograms/dose pump sublingual spray	Glyceryl trinitrate
Anti-anginals	4785	62988020	Glyceryl trinitrate 400micrograms/dose aerosol sublingual spray	Glyceryl trinitrate
Anti-anginals	9308	62991020	Glyceryl trinitrate 1mg modified-release buccal tablets sugar free	Glyceryl trinitrate
Anti-anginals	6110	62992020	Glyceryl trinitrate 2mg modified-release buccal tablets sugar free	Glyceryl trinitrate
Anti-anginals	7760	62993020	Glyceryl trinitrate 2.6mg modified-release tablets	Glyceryl trinitrate
Anti-anginals	3645	62997020	Glyceryl trinitrate 5mg modified-release buccal tablets sugar free	Glyceryl trinitrate
Anti-anginals	8573	62998020	Glyceryl trinitrate 6.4mg modified-release tablets	Glyceryl trinitrate
Anti-anginals	8095	62999020	Glyceryl trinitrate 10mg modified-release tablets	Glyceryl trinitrate
Anti-anginals	8330	63002020	Glyceryl trinitrate 3mg modified-release buccal tablets sugar free	Glyceryl trinitrate
Anti-anginals	2695	63007020	Glyceryl trinitrate 5mg/24hours transdermal patches	Glyceryl trinitrate
Anti-anginals	4772	63008020	Glyceryl trinitrate 10mg/24hours transdermal patches	Glyceryl trinitrate
Anti-anginals	4787	63009020	Glyceryl trinitrate 2% ointment	Glyceryl trinitrate
Anti-anginals	3091	63030020	Deponit 5 transdermal patches (Aspire Pharma Ltd)	Glyceryl trinitrate
Anti-anginals	5638	63034020	Percutol 2% w/v Ointment (Dominion Pharma)	Glyceryl trinitrate
Anti-anginals	11189	64846020	Glyceryl trinitrate 2.5mg/24hr transdermal patch	Glyceryl Trinitrate
Anti-anginals	11585	64847020	Glyceryl trinitrate 15mg/24hours transdermal patches	Glyceryl trinitrate
Anti-anginals	8601	65008020	Nitro-Dur 0.6mg/hour transdermal patches (Merck Sharp & Dohme Ltd)	Glyceryl trinitrate
Anti-anginals	9323	65148020	Nitro-dur 2.5mg/24 hr Transdermal patch (Merck Sharp & Dohme Ltd)	Glyceryl Trinitrate
Anti-anginals	9523	65149020	Nitro-Dur 0.2mg/hour transdermal patches (Merck Sharp & Dohme Ltd)	Glyceryl trinitrate
Anti-anginals	6336	65150020	Nitro-Dur 0.4mg/hour transdermal patches (Merck Sharp & Dohme Ltd)	Glyceryl trinitrate
Anti-anginals	28030	66881020	Glyceryl trinitrate 400microgram/dose Pump spray (Hillcross Pharmaceuticals Ltd)	Glyceryl trinitrate
Anti-anginals	20915	66998020	Glyceryl trinitrate 400microgram/dose Pump spray cfc free (PLIVA Pharma Ltd)	Glyceryl trinitrate
Anti-anginals	8289	68099020	Deponit 10 transdermal patches (Aspire Pharma Ltd)	Glyceryl trinitrate
Anti-anginals	2991	68833020	Glytrin 400microgram/dose Spray (Sanofi)	Glyceryl Trinitrate
Anti-anginals	4677	68834020	Glytrin 400micrograms/dose aerosol sublingual spray (Aspire Pharma Ltd)	Glyceryl trinitrate
Anti-anginals	37242	69626020	Glyceryl trinitrate 400micrograms/dose aerosol sublingual spray (Zentiva)	Glyceryl trinitrate
Anti-anginals	4626	74429020	GTN 300microgram sublingual tablets (Martindale Pharmaceuticals Ltd)	Glyceryl trinitrate
Anti-anginals	11969	76672020	Suscard Buccal 2mg tablets (Forest Laboratories UK Ltd)	Glyceryl trinitrate
Anti-anginals	5894	78034020	Percutol 2% ointment (Aspire Pharma Ltd)	Glyceryl trinitrate
Anti-anginals	17571	78922020	Trintek 5 transdermal patches (Mercury Pharma Group Ltd)	Glyceryl trinitrate
Anti-anginals	29000	79525020	Trintek 15 transdermal patches (Mercury Pharma Group Ltd)	Glyceryl trinitrate
Anti-anginals	4887	83384020	Nitromin 400micrograms/dose pump sublingual spray (Teva UK Ltd)	Glyceryl trinitrate
Anti-anginals	14734	85974020	Suscard Buccal 3mg tablets (Forest Laboratories UK Ltd)	Glyceryl trinitrate
Anti-anginals	12968	85976020	Suscard Buccal 5mg tablets (Forest Laboratories UK Ltd)	Glyceryl trinitrate
Anti-anginals	6239	86999020	Nitrolingual 400microgram/dose Pump spray cfc free (Merck Serono Ltd)	Glyceryl trinitrate
Anti-anginals	7317	90899020	Coro-Nitro 400micrograms/dose pump sublingual spray (J M Loveridge Ltd)	Glyceryl trinitrate
Anti-anginals	61998	14485021	Isosorbide dinitrate 20mg tablets (Waymade Healthcare Plc)	Isosorbide dinitrate
Anti-anginals	10607	49980020	Isordil 5mg tablets (Shire Pharmaceuticals Ltd)	Isosorbide dinitrate
Anti-anginals	1753	49981020	Isordil 10mg tablets (Shire Pharmaceuticals Ltd)	Isosorbide dinitrate
Anti-anginals	10700	49982020	Isordil 30mg tablets (Shire Pharmaceuticals Ltd)	Isosorbide dinitrate
Anti-anginals	20500	51624020	Soni-Slo SR 20mg capsules (Lipha Pharmaceuticals Ltd)	Isosorbide dinitrate
Anti-anginals	27485	51625020	Soni-Slo SR 40mg capsules (Lipha Pharmaceuticals Ltd)	Isosorbide dinitrate
Anti-anginals	8539	51628020	Sorbichew 5mg Tablet (AstraZeneca UK Ltd)	Isosorbide dinitrate
Anti-anginals	8428	51632020	Sorbid-40 SA capsules (AstraZeneca UK Ltd)	Isosorbide dinitrate
Anti-anginals	18964	51633020	Sorbid-20 SA capsules (AstraZeneca UK Ltd)	Isosorbide dinitrate
Anti-anginals	7702	51637020	Sorbitrate 10mg Tablet (AstraZeneca UK Ltd)	Isosorbide dinitrate
Anti-anginals	12017	51638020	Sorbitrate 20mg Tablet (AstraZeneca UK Ltd)	Isosorbide dinitrate
Anti-anginals	12151	52164020	Vascardin 10mg Tablet (Nicholas Laboratories Ltd)	Isosorbide dinitrate
Anti-anginals	26583	52165020	Vascardin 30mg Tablet (Nicholas Laboratories Ltd)	Isosorbide dinitrate
Anti-anginals	43524	52251020	Isosorbide dinitrate 10mg tablets (A A H Pharmaceuticals Ltd)	Isosorbide dinitrate
Anti-anginals	12063	52548020	Isordil Tembids 40mg modified-release capsules (Shire Pharmaceuticals Ltd)	Isosorbide dinitrate
Anti-anginals	34547	53264020	Isosorbide dinitrate 10mg tablets (Actavis UK Ltd)	Isosorbide dinitrate
Anti-anginals	69521	53265020	Isosorbide dinitrate 20mg tablets (Actavis UK Ltd)	Isosorbide dinitrate
Anti-anginals	13090	56518020	Isosorbide dinitrate 1.25mg/dose sublingual spray sugar free	Isosorbide dinitrate
Anti-anginals	17867	56546020	Imtack 1.25mg/actuation Spray (AstraZeneca UK Ltd)	Isosorbide dinitrate
Anti-anginals	20530	58389020	Cedocard -20 Tablet (Pharmacia Ltd)	Isosorbide dinitrate
Anti-anginals	10459	58392020	Cedocard 5 tablets (Pfizer Ltd)	Isosorbide dinitrate
Anti-anginals	15034	58395020	Cedocard -10 Tablet (Pharmacia Ltd)	Isosorbide dinitrate
Anti-anginals	10587	58398020	Cedocard Retard 20 tablets (Pfizer Ltd)	Isosorbide dinitrate
Anti-anginals	22876	59155020	Cedocard -40 Tablet (Pharmacia Ltd)	Isosorbide Dinitrate
Anti-anginals	9622	59159020	Cedocard Retard 40 tablets (Pfizer Ltd)	Isosorbide dinitrate
Anti-anginals	8790	63714020	Isosorbide dinitrate 5mg Sublingual tablet	Isosorbide Dinitrate
Anti-anginals	9335	63715020	Isosorbide dinitrate 5mg tablets	Isosorbide dinitrate
Anti-anginals	1754	63716020	Isosorbide dinitrate 10mg tablets	Isosorbide dinitrate
Anti-anginals	41993	63719020	Isosorbide dinitrate 40mg Tablet	Isosorbide Dinitrate
Anti-anginals	2933	63722020	Isosorbide dinitrate 20mg tablets	Isosorbide dinitrate
Anti-anginals	4508	63723020	Isosorbide dinitrate 30mg tablets	Isosorbide dinitrate
Anti-anginals	5004	63726020	Isosorbide dinitrate 20mg modified-release tablets	Isosorbide dinitrate
Anti-anginals	6111	63727020	Isosorbide dinitrate 40mg modified-release tablets	Isosorbide dinitrate
Anti-anginals	9497	63728020	Isosorbide dinitrate 40mg modified-release capsules	Isosorbide dinitrate
Anti-anginals	4843	63731020	Isosorbide dinitrate 20mg modified-release capsules	Isosorbide dinitrate
Anti-anginals	17256	63740020	Isoket -20 Tablet (Schwarz Pharma Ltd)	Isosorbide dinitrate
Anti-anginals	18889	63743020	Isoket Retard 20 tablets (Aspire Pharma Ltd)	Isosorbide dinitrate
Anti-anginals	9744	63744020	Isoket Retard 40 tablets (Aspire Pharma Ltd)	Isosorbide dinitrate
Anti-anginals	31475	79943020	Jeridin 10mg Tablet (Berk Pharmaceuticals Ltd)	Isosorbide dinitrate
Anti-anginals	24651	84827020	Angitak 1.25mg/dose spray (LPC Medical (UK) Ltd)	Isosorbide dinitrate
Anti-anginals	22427	85681020	Isosorbide dinitrate 30mg/dose transdermal spray	Isosorbide dinitrate
Anti-anginals	25795	85689020	Isocard 30mg/dose transdermal spray (LPC Medical (UK) Ltd)	Isosorbide dinitrate
Anti-anginals	67257	1829020	Elantan LA50 capsules (Dowelhurst Ltd)	Isosorbide mononitrate
Anti-anginals	68384	1832020	Elantan LA50 capsules (Mawdsley-Brooks & Company Ltd)	Isosorbide mononitrate
Anti-anginals	67284	1834020	Ismo Retard 40mg tablets (Dowelhurst Ltd)	Isosorbide mononitrate
Anti-anginals	53687	1836020	Isosorbide mononitrate 25mg modified-release capsules (Alliance Healthcare (Distribution) Ltd)	Isosorbide mononitrate
Anti-anginals	54824	1838020	Isosorbide mononitrate 10mg tablets (Alliance Healthcare (Distribution) Ltd)	Isosorbide mononitrate
Anti-anginals	67321	1841020	Elantan 10 tablets (Waymade Healthcare Plc)	Isosorbide mononitrate
Anti-anginals	58133	1842020	Isosorbide mononitrate 10mg tablets (Sigma Pharmaceuticals Plc)	Isosorbide mononitrate
Anti-anginals	60941	1846020	Ismo 20 tablets (Waymade Healthcare Plc)	Isosorbide mononitrate
Anti-anginals	67335	1849020	Elantan 20 tablets (Waymade Healthcare Plc)	Isosorbide mononitrate
Anti-anginals	67810	1858020	Imdur 60mg modified-release tablets (Waymade Healthcare Plc)	Isosorbide mononitrate
Anti-anginals	52245	1860020	Monosorb XL 60 tablets (Kent Pharmaceuticals Ltd)	Isosorbide mononitrate
Anti-anginals	56416	1863020	Imdur 60mg modified-release tablets (DE Pharmaceuticals)	Isosorbide mononitrate
Anti-anginals	65741	1865020	Imdur 60mg modified-release tablets (Lexon (UK) Ltd)	Isosorbide mononitrate
Anti-anginals	60336	14476021	Isosorbide mononitrate 10mg tablets (Waymade Healthcare Plc)	Isosorbide mononitrate
Anti-anginals	67934	14477021	Isosorbide mononitrate 20mg tablets (Waymade Healthcare Plc)	Isosorbide mononitrate
Anti-anginals	60055	20163021	Isosorbide mononitrate 25mg modified-release capsules (Waymade Healthcare Plc)	Isosorbide mononitrate
Anti-anginals	60826	20185020	Isosorbide mononitrate 10mg/5ml oral solution	Isosorbide mononitrate
Anti-anginals	67486	20187020	Isosorbide mononitrate 10mg/5ml oral suspension	Isosorbide mononitrate
Anti-anginals	58079	20209020	Isosorbide mononitrate 20mg/5ml oral solution	Isosorbide mononitrate
Anti-anginals	69126	20211020	Isosorbide mononitrate 20mg/5ml oral suspension	Isosorbide mononitrate
Anti-anginals	69127	20215020	Isosorbide mononitrate 30mg/5ml oral suspension	Isosorbide mononitrate
Anti-anginals	62404	21719021	Isosorbide mononitrate 10mg tablets (DE Pharmaceuticals)	Isosorbide mononitrate
Anti-anginals	66790	23685021	Isosorbide mononitrate 40mg modified-release capsules (CST Pharma Ltd)	Isosorbide mononitrate
Anti-anginals	34951	49884020	Isosorbide mononitrate 20mg Tablet (Berk Pharmaceuticals Ltd)	Isosorbide mononitrate
Anti-anginals	46910	49885020	Isosorbide mononitrate 10mg Tablet (Berk Pharmaceuticals Ltd)	Isosorbide mononitrate
Anti-anginals	34426	49893020	Isosorbide mononitrate 20mg tablets (IVAX Pharmaceuticals UK Ltd)	Isosorbide mononitrate
Anti-anginals	43421	49894020	Isosorbide mononitrate 40mg tablets (IVAX Pharmaceuticals UK Ltd)	Isosorbide mononitrate
Anti-anginals	41688	49898020	Isosorbide mononitrate 20mg tablets (A A H Pharmaceuticals Ltd)	Isosorbide mononitrate
Anti-anginals	34558	49899020	Isosorbide mononitrate 10mg tablets (A A H Pharmaceuticals Ltd)	Isosorbide mononitrate
Anti-anginals	25276	50215020	Isib 20mg Tablet (Ashbourne Pharmaceuticals Ltd)	Isosorbide mononitrate
Anti-anginals	24683	50216020	Isib 40mg Tablet (Ashbourne Pharmaceuticals Ltd)	Isosorbide mononitrate
Anti-anginals	65695	53310021	Isosorbide mononitrate 25mg modified-release capsules (DE Pharmaceuticals)	Isosorbide mononitrate
Anti-anginals	32059	53357020	Slomon XL 60 tablets (Zurich Pharmaceuticals)	Isosorbide mononitrate
Anti-anginals	41676	54035020	Isosorbide mononitrate 20mg tablets (Actavis UK Ltd)	Isosorbide mononitrate
Anti-anginals	34196	54036020	Isosorbide mononitrate 10mg tablets (Actavis UK Ltd)	Isosorbide mononitrate
Anti-anginals	8037	54812020	Monit 20mg tablets (Sanofi-Synthelabo Ltd)	Isosorbide mononitrate
Anti-anginals	33992	55374020	Isosorbide mononitrate 10mg tablets (Teva UK Ltd)	Isosorbide mononitrate
Anti-anginals	41687	55375020	Isosorbide mononitrate 20mg tablets (Teva UK Ltd)	Isosorbide mononitrate
Anti-anginals	41737	56051020	Isosorbide mononitrate 10mg tablets (IVAX Pharmaceuticals UK Ltd)	Isosorbide mononitrate
Anti-anginals	25878	56052020	Isosorbide mononitrate 60mg Modified-release tablet (IVAX Pharmaceuticals UK Ltd)	Isosorbide mononitrate
Anti-anginals	15083	56900020	Ismo Starter pack (Roche Products Ltd)	Isosorbide Mononitrate
Anti-anginals	2633	56901020	Ismo 10- Tablet (Roche Products Ltd)	Isosorbide mononitrate
Anti-anginals	7746	56902020	Ismo 20- Tablet (Roche Products Ltd)	Isosorbide mononitrate
Anti-anginals	21066	58401020	Mono-cedocard -20 Tablet (Pharmacia Ltd)	Isosorbide mononitrate
Anti-anginals	12284	58404020	Mono-cedocard -40 Tablet (Pharmacia Ltd)	Isosorbide mononitrate
Anti-anginals	7433	58551020	Monit LS 10mg tablets (Sanofi-Synthelabo Ltd)	Isosorbide mononitrate
Anti-anginals	8940	59189020	Ismo 40 tablets (Roche Products Ltd)	Isosorbide mononitrate
Anti-anginals	34318	59428020	Isosorbide mononitrate 60mg Modified-release tablet (Lagap)	Isosorbide mononitrate
Anti-anginals	33660	59812020	Isosorbide mononitrate 60mg Modified-release tablet (Actavis UK Ltd)	Isosorbide mononitrate
Anti-anginals	33661	60394020	Isosorbide mononitrate 60mg modified-release tablets (A A H Pharmaceuticals Ltd)	Isosorbide mononitrate
Anti-anginals	32841	60866020	Isosorbide mononitrate 10mg tablets (Dexcel-Pharma Ltd)	Isosorbide mononitrate
Anti-anginals	47810	60948020	Isosorbide mononitrate 40mg Tablet (Lagap)	Isosorbide mononitrate
Anti-anginals	34582	61875020	Isosorbide mononitrate 20mg tablets (Mylan)	Isosorbide mononitrate
Anti-anginals	46911	62795020	Isosorbide mononitrate 10mg tablets (Kent Pharmaceuticals Ltd)	Isosorbide mononitrate
Anti-anginals	58386	62796020	Isosorbide mononitrate 20mg tablets (Kent Pharmaceuticals Ltd)	Isosorbide mononitrate
Anti-anginals	46949	63391020	Isosorbide mononitrate 60mg Modified-release tablet (Kent Pharmaceuticals Ltd)	Isosorbide mononitrate
Anti-anginals	779	63754020	Isosorbide mononitrate 10mg tablets	Isosorbide mononitrate
Anti-anginals	91	63755020	Isosorbide mononitrate 20mg tablets	Isosorbide mononitrate
Anti-anginals	1994	63756020	Isosorbide mononitrate 40mg tablets	Isosorbide mononitrate
Anti-anginals	37028	63759020	Isosorbide mononitrate starter pack Tablet	Isosorbide Mononitrate
Anti-anginals	47950	65752020	Isosorbide mononitrate 50mg modified-release capsules (A A H Pharmaceuticals Ltd)	Isosorbide mononitrate
Anti-anginals	32442	65865020	Isosorbide mononitrate 25mg modified-release capsules (A A H Pharmaceuticals Ltd)	Isosorbide mononitrate
Anti-anginals	41421	66021020	Isosorbide mononitrate xl 40mg Tablet (Hillcross Pharmaceuticals Ltd)	Isosorbide mononitrate
Anti-anginals	14685	66498020	Monit xl 60 60mg Modified-release tablet (Sterwin Medicines)	Isosorbide mononitrate
Anti-anginals	47803	66733020	Isosorbide mononitrate 20mg tablets (Sandoz Ltd)	Isosorbide mononitrate
Anti-anginals	632	68180020	Imdur 60mg modified-release tablets (AstraZeneca UK Ltd)	Isosorbide mononitrate
Anti-anginals	8324	68454020	Isosorbide mononitrate 50mg modified-release capsules	Isosorbide mononitrate
Anti-anginals	621	68455020	Isosorbide mononitrate 60mg modified-release tablets	Isosorbide mononitrate
Anti-anginals	2619	68456020	Isosorbide mononitrate 40mg modified-release tablets	Isosorbide mononitrate
Anti-anginals	9295	68459020	Elantan la 50mg Capsule (UCB Pharma Ltd)	Isosorbide mononitrate
Anti-anginals	8902	68460020	Elantan la 25mg Capsule (UCB Pharma Ltd)	Isosorbide mononitrate
Anti-anginals	7762	69370020	Elantan 10 tablets (UCB Pharma Ltd)	Isosorbide mononitrate
Anti-anginals	70995	69648020	Isosorbide mononitrate 10mg tablets (Almus Pharmaceuticals Ltd)	Isosorbide mononitrate
Anti-anginals	12804	70333020	MCR-50 modified-release capsules (Pfizer Ltd)	Isosorbide mononitrate
Anti-anginals	23011	72441020	Isotrate 20mg Tablet (Bioglan Laboratories Ltd)	Isosorbide mononitrate
Anti-anginals	16630	73030020	Mono-cedocard -10 Tablet (Pharmacia Ltd)	Isosorbide mononitrate
Anti-anginals	9088	73081020	Ismo retard 40mg Tablet (Roche Products Ltd)	Isosorbide mononitrate
Anti-anginals	13446	73735020	Elantan 20mg Tablet (UCB Pharma Ltd)	Isosorbide mononitrate
Anti-anginals	15069	73736020	Elantan 40mg Tablet (UCB Pharma Ltd)	Isosorbide mononitrate
Anti-anginals	8793	73942020	Monit SR 40mg tablets (Sanofi-Synthelabo Ltd)	Isosorbide mononitrate
Anti-anginals	521	74306020	Isosorbide mononitrate 25mg modified-release capsules	Isosorbide mononitrate
Anti-anginals	4609	74307020	Isosorbide mononitrate 40mg modified-release capsules	Isosorbide mononitrate
Anti-anginals	776	74308020	Isosorbide mononitrate 60mg modified-release capsules	Isosorbide mononitrate
Anti-anginals	26260	75722020	Angitate 10mg Tablet (Berk Pharmaceuticals Ltd)	Isosorbide mononitrate
Anti-anginals	26221	75723020	Angitate 20mg Tablet (Berk Pharmaceuticals Ltd)	Isosorbide mononitrate
Anti-anginals	46798	76504020	Isosorbide mononitrate 60mg Modified-release tablet (Sovereign Medical Ltd)	Isosorbide mononitrate
Anti-anginals	6099	77253020	Monosorb XL 60 tablets (Teva UK Ltd)	Isosorbide mononitrate
Anti-anginals	22726	77256020	Monosorb xl 60mg Modified-release tablet (Generics (UK) Ltd)	Isosorbide mononitrate
Anti-anginals	11596	77719020	Xismox XL 60 tablets (Thornton & Ross Ltd)	Isosorbide mononitrate
Anti-anginals	33354	77791020	Cibral 40 tablets (Ranbaxy (UK) Ltd)	Isosorbide mononitrate
Anti-anginals	24671	77991020	Isib 50 xl 50mg Modified-release capsule (Ashbourne Pharmaceuticals Ltd)	Isosorbide mononitrate
Anti-anginals	14679	78055020	Cibral xl 60mg Tablet (Ranbaxy (UK) Ltd)	Isosorbide mononitrate
Anti-anginals	14896	78056020	Cibral 10 tablets (Ranbaxy (UK) Ltd)	Isosorbide mononitrate
Anti-anginals	30409	78057020	Cibral 20 tablets (Ranbaxy (UK) Ltd)	Isosorbide mononitrate
Anti-anginals	26253	78109020	Angeze 10 tablets (Opus Pharmaceuticals Ltd)	Isosorbide mononitrate
Anti-anginals	26222	78110020	Angeze 20 tablets (Opus Pharmaceuticals Ltd)	Isosorbide mononitrate
Anti-anginals	26246	78111020	Angeze 40mg Tablet (Opus Pharmaceuticals Ltd)	Isosorbide mononitrate
Anti-anginals	24557	78123020	Dynamin XL25 capsules (Teva UK Ltd)	Isosorbide mononitrate
Anti-anginals	44179	78242020	Imo LA 50mg capsules (Kent Pharmaceuticals Ltd)	Isosorbide mononitrate
Anti-anginals	16256	78415020	Modisal LA25 capsules (Sandoz Ltd)	Isosorbide mononitrate
Anti-anginals	25100	78416020	Modisal LA50 capsules (Sandoz Ltd)	Isosorbide mononitrate
Anti-anginals	36181	78957020	Dynamin XL50 capsules (Teva UK Ltd)	Isosorbide mononitrate
Anti-anginals	26279	79946020	Dynamin 10mg tablets (Teva UK Ltd)	Isosorbide mononitrate
Anti-anginals	26251	79947020	Dynamin 20mg tablets (Teva UK Ltd)	Isosorbide mononitrate
Anti-anginals	9719	80194020	Isib 60XL tablets (Alliance Pharmaceuticals Ltd)	Isosorbide mononitrate
Anti-anginals	6821	80276020	Isotard 60XL tablets (Kyowa Kirin Ltd)	Isosorbide mononitrate
Anti-anginals	9282	80693020	Nyzamac SR 40mg capsules (Ethypharm UK Ltd)	Isosorbide mononitrate
Anti-anginals	6159	80694020	Nyzamac SR 60mg capsules (Ethypharm UK Ltd)	Isosorbide mononitrate
Anti-anginals	15998	80864020	Eumon xl 40mg Tablet (Neo Laboratories Ltd)	Isosorbide mononitrate
Anti-anginals	19839	80865020	Eumon xl 60mg Tablet (Neo Laboratories Ltd)	Isosorbide mononitrate
Anti-anginals	14731	82299020	Isodur 25XL capsules (Galen Ltd)	Isosorbide mononitrate
Anti-anginals	22752	82301020	Isodur 50XL capsules (Galen Ltd)	Isosorbide mononitrate
Anti-anginals	22358	82425020	Monigen XL 60 tablets (Mylan)	Isosorbide mononitrate
Anti-anginals	9492	84084020	Modisal 60 XL tablets (Sandoz Ltd)	Isosorbide mononitrate
Anti-anginals	18787	84096020	Angeze sr 40mg Modified-release capsule (Opus Pharmaceuticals Ltd)	Isosorbide mononitrate
Anti-anginals	26271	84097020	Angeze sr 60mg Modified-release capsule (Opus Pharmaceuticals Ltd)	Isosorbide mononitrate
Anti-anginals	6343	84126020	Monomax XL 60mg tablets (Chiesi Ltd)	Isosorbide mononitrate
Anti-anginals	21764	84742020	Monodur 60mg Modified-release tablet (Waymade Healthcare Plc)	Isosorbide mononitrate
Anti-anginals	7327	84744020	Isosorbide mononitrate 25mg modified-release tablets	Isosorbide mononitrate
Anti-anginals	11616	84745020	Isosorbide mononitrate 50mg modified-release tablets	Isosorbide mononitrate
Anti-anginals	9703	84747020	Isotard 25XL tablets (Kyowa Kirin Ltd)	Isosorbide mononitrate
Anti-anginals	29777	84748020	Isotard 25 xl 25mg Modified-release capsule (ProStrakan Ltd)	Isosorbide mononitrate
Anti-anginals	26853	84825020	Monosorb xl 60mg Modified-release tablet (Ratiopharm UK Ltd)	Isosorbide mononitrate
Anti-anginals	32253	84984020	Carmil XL 60mg tablets (Mylan)	Isosorbide mononitrate
Anti-anginals	20879	85621020	Isotard 50XL tablets (Kyowa Kirin Ltd)	Isosorbide mononitrate
Anti-anginals	10147	85819020	Trangina XL 60mg tablets (Actavis UK Ltd)	Isosorbide mononitrate
Anti-anginals	26266	85838020	Monosorb XL 60 tablets (Dexcel-Pharma Ltd)	Isosorbide mononitrate
Anti-anginals	9908	86634020	Chemydur 60XL tablets (AMCo)	Isosorbide mononitrate
Anti-anginals	9660	86636020	Isotard 40XL tablets (Kyowa Kirin Ltd)	Isosorbide mononitrate
Anti-anginals	25175	86772020	Monosorb xl 60mg Modified-release tablet (IVAX Pharmaceuticals UK Ltd)	Isosorbide mononitrate
Anti-anginals	16940	87011020	Zemon 60 XL tablets (Fannin UK Ltd)	Isosorbide mononitrate
Anti-anginals	20322	87528020	Monomil XL 60mg tablets (Teva UK Ltd)	Isosorbide mononitrate
Anti-anginals	28719	88498020	Zemon 40 XL tablets (Kent Pharmaceuticals Ltd)	Isosorbide mononitrate
Anti-anginals	26043	88825020	Monosorb XL 60 tablets (Almus Pharmaceuticals Ltd)	Isosorbide mononitrate
Anti-anginals	47814	92799020	Isosorbide mononitrate Oral solution	Isosorbide Mononitrate
Anti-anginals	39035	95509020	Elantan 20 tablets (UCB Pharma Ltd)	Isosorbide mononitrate
Anti-anginals	39552	95511020	Elantan 40 tablets (UCB Pharma Ltd)	Isosorbide mononitrate
Anti-anginals	38883	95513020	Elantan LA25 capsules (Aspire Pharma Ltd)	Isosorbide mononitrate
Anti-anginals	38946	95515020	Elantan LA50 capsules (Aspire Pharma Ltd)	Isosorbide mononitrate
Anti-anginals	39052	95583020	Cibral XL 60 tablets (Ranbaxy (UK) Ltd)	Isosorbide mononitrate
Anti-anginals	39135	95871020	Ismo 10 tablets (Intrapharm Laboratories Ltd)	Isosorbide mononitrate
Anti-anginals	39130	95873020	Ismo 20 tablets (Intrapharm Laboratories Ltd)	Isosorbide mononitrate
Anti-anginals	44712	97247020	Relosorb XL 60mg tablets (Relonchem Ltd)	Isosorbide mononitrate
Anti-anginals	54757	97513020	Eumon 40 XL tablets (Tillomed Laboratories Ltd)	Isosorbide mononitrate
Anti-anginals	41060	97527020	Ismo Retard 40mg tablets (Intrapharm Laboratories Ltd)	Isosorbide mononitrate
Anti-anginals	61191	98005020	Eumon 60 XL tablets (Tillomed Laboratories Ltd)	Isosorbide mononitrate
Anti-anginals	43615	98416020	Tardisc XL 60 tablets (Discovery Pharmaceuticals)	Isosorbide mononitrate
Anti-anginals	56933	99995020	Modisal XL 40mg tablets (Ennogen Pharma Ltd)	Isosorbide mononitrate
Anti-anginals	11928	89991020	Ivabradine 5mg tablets	Ivabradine hydrochloride
Anti-anginals	18194	89993020	Ivabradine 7.5mg tablets	Ivabradine hydrochloride
Anti-anginals	11981	90005020	Procoralan 5mg tablets (Servier Laboratories Ltd)	Ivabradine hydrochloride
Anti-anginals	25379	90007020	Procoralan 7.5mg tablets (Servier Laboratories Ltd)	Ivabradine hydrochloride
Anti-anginals	59955	2070020	Nicorandil 10mg tablets (Alliance Healthcare (Distribution) Ltd)	Nicorandil
Anti-anginals	68431	35322020	Nicorandil 10mg oral powder sachets	Nicorandil
Anti-anginals	70996	42158020	Nicorandil 10mg tablets (Zentiva)	Nicorandil
Anti-anginals	567	62754020	Nicorandil 10mg tablets	Nicorandil
Anti-anginals	1687	62755020	Nicorandil 20mg tablets	Nicorandil
Anti-anginals	13795	67601020	Ikorel 10mg tablets (Zentiva)	Nicorandil
Anti-anginals	13796	67602020	Ikorel 20mg tablets (Zentiva)	Nicorandil
Anti-anginals	13530	54157020	Mycardol 30mg Tablet (Sanofi-Synthelabo Ltd)	Pentaerythrityl Tetranitrate
Anti-anginals	17179	65550020	Pentaerythrityl tetranitrate 30mg tablet	Pentaerythrityl Tetranitrate
Anti-anginals	23772	65551020	Pentaerythrityl tetranitrate 30mg capsule	Pentaerythrityl Tetranitrate
Anti-anginals	13534	65554020	Cardiacap 30mg Capsule (Consolidated Chemicals (UK) Ltd)	Pentaerythrityl Tetranitrate
Anti-anginals	39712	96401020	Ranolazine 375mg modified-release tablets	Ranolazine
Anti-anginals	39713	96403020	Ranolazine 500mg modified-release tablets	Ranolazine
Anti-anginals	39990	96405020	Ranolazine 750mg modified-release tablets	Ranolazine
Anti-anginals	41037	96407020	Ranexa 375mg modified-release tablets (A. Menarini Farmaceutica Internazionale SRL)	Ranolazine
Anti-anginals	41073	96409020	Ranexa 500mg modified-release tablets (A. Menarini Farmaceutica Internazionale SRL)	Ranolazine
Anti-anginals	41378	96411020	Ranexa 750mg modified-release tablets (A. Menarini Farmaceutica Internazionale SRL)	Ranolazine
Anti-anginals	72075	52263020	Isosorbide dinitrate 20mg Tablet (Forest Laboratories UK Ltd)	Isosorbide dinitrate
Anti-anginals	72287	79750021	Carmil XL 60mg tablets (Milpharm Ltd)	Isosorbide mononitrate
Anti-anginals	72217	53312021	Isosorbide mononitrate 60mg modified-release tablets (Mawdsley-Brooks & Company Ltd)	Isosorbide mononitrate
Anti-anginals	72983	52694021	Isosorbide dinitrate 20mg tablets (Sigma Pharmaceuticals Plc)	Isosorbide dinitrate
Anti-anginals	73024	1843020	Isosorbide mononitrate 10mg tablets (Phoenix Healthcare Distribution Ltd)	Isosorbide mononitrate
Anti-anginals	73453	53311021	Isosorbide mononitrate 60mg modified-release tablets (DE Pharmaceuticals)	Isosorbide mononitrate
Anti-anginals	73764	87107020	Phasonit LA50 capsules (Schwarz Pharma Ltd)	Isosorbide mononitrate
Anti-anginals	73986	37819020	Nitrolingual 400micrograms/dose pump sublingual spray (Necessity Supplies Ltd)	Glyceryl trinitrate
Anti-anginals	73985	1833020	Elantan LA50 capsules (Necessity Supplies Ltd)	Isosorbide mononitrate
Anti-anginals	74023	1854020	Elantan 40 tablets (Waymade Healthcare Plc)	Isosorbide mononitrate
Anti-anginals	73988	38504020	Elantan LA25 capsules (Mawdsley-Brooks & Company Ltd)	Isosorbide mononitrate
Anti-anginals	72529	80457021	Ivabradine 2.5mg tablets	Ivabradine hydrochloride
Anti-anginals	73611	36194020	Vastarel 20mg tablets (Imported (France))	Trimetazidine dihydrochloride
Anti-anginals	73628	78667020	Nicorandil 10mg tablets (Actavis UK Ltd)	Nicorandil
Anticoagulant	4446	60995020	Acenocoumarol 1mg tablets	Acenocoumarol
Anticoagulant	15376	60996020	Acenocoumarol 4mg tablets	Acenocoumarol
Anticoagulant	55577	2314020	Sinthrome 1mg tablets (Lexon (UK) Ltd)	Acenocoumarol
Anticoagulant	5305	51558020	Sinthrome 1mg tablets (Merus Labs Luxco S.a R.L.)	Acenocoumarol
Anticoagulant	15006	51559020	Sinthrome 4mg Tablet (Alliance Pharmaceuticals Ltd)	Acenocoumarol
Anticoagulant	58594	46753020	Eliquis 5mg tablets (Bristol-Myers Squibb Pharmaceuticals Ltd)	Apixaban
Anticoagulant	47566	345021	Apixaban 2.5mg tablets	Apixaban
Anticoagulant	53740	347021	Eliquis 2.5mg tablets (Bristol-Myers Squibb Pharmaceuticals Ltd)	Apixaban
Anticoagulant	54066	46752020	Apixaban 5mg tablets	Apixaban
Anticoagulant	42474	94835020	Pradaxa 75mg capsules (Boehringer Ingelheim Ltd)	Dabigatran etexilate mesilate
Anticoagulant	46678	253021	Pradaxa 150mg capsules (Boehringer Ingelheim Ltd)	Dabigatran etexilate mesilate
Anticoagulant	39444	94831020	Dabigatran etexilate 110mg capsules	Dabigatran etexilate mesilate
Anticoagulant	39755	94837020	Pradaxa 110mg capsules (Boehringer Ingelheim Ltd)	Dabigatran etexilate mesilate
Anticoagulant	46632	251021	Dabigatran etexilate 150mg capsules	Dabigatran etexilate mesilate
Anticoagulant	39503	94833020	Dabigatran etexilate 75mg capsules	Dabigatran etexilate mesilate
Anticoagulant	16530	88316020	Fragmin 12,500units/0.5ml solution for injection pre-filled syringes (Pfizer Ltd)	Dalteparin sodium
Anticoagulant	19486	88302020	Dalteparin sodium 7,500units/0.3ml solution for injection pre-filled syringes	Dalteparin sodium
Anticoagulant	36911	93934020	Fragmin 10,000units/1ml solution for injection ampoules (Pfizer Ltd)	Dalteparin sodium
Anticoagulant	9140	54874020	Dalteparin sodium 10,000units/4ml solution for injection ampoules	Dalteparin sodium
Anticoagulant	10194	88306020	Dalteparin sodium 12,500units/0.5ml solution for injection pre-filled syringes	Dalteparin sodium
Anticoagulant	56398	9750020	Fragmin 5,000units/0.2ml solution for injection pre-filled syringes (Mawdsley-Brooks & Company Ltd)	Dalteparin sodium
Anticoagulant	10072	88314020	Fragmin 10,000units/0.4ml solution for injection pre-filled syringes (Pfizer Ltd)	Dalteparin sodium
Anticoagulant	49578	2272020	Dalteparin sodium 10,000units/1ml solution for injection pre-filled syringes	Dalteparin sodium
Anticoagulant	22428	75575020	Dalteparin sodium 100,000units/4ml solution for injection vials	Dalteparin sodium
Anticoagulant	16476	88320020	Fragmin 18,000units/0.72ml solution for injection pre-filled syringes (Pfizer Ltd)	Dalteparin sodium
Anticoagulant	55096	9749020	Fragmin 5,000units/0.2ml solution for injection pre-filled syringes (Waymade Healthcare Plc)	Dalteparin sodium
Anticoagulant	52004	2263020	Fragmin 12,500units/0.5ml solution for injection pre-filled syringes (Waymade Healthcare Plc)	Dalteparin sodium
[truncated: 9,098 more rows]
